# Supplementary material for: Dynamic post-transcriptional regulation by Mrn1 links cell wall homeostasis to mitochondrial structure and function
Source: PLoS Genet. 2021 Apr 15;17(4):e1009521. doi: 10.1371/journal.pgen.1009521 (PMC8079021; doi:10.1371/journal.pgen.1009521)
Supplement: S2 Dataset — (CSV) [file pgen.1009521.s008.csv]

	guide	baseMean	log2FoldChange	lfcSE	stat	pvalue	padj	Yorf1	gene	desc
1	ICR1_03	136.359594739597	1.38893607804131	0.764778630886993	1.81612825194974	0.0693507008274878	0.94061944939907	NA	NA	NA
2	ITS2-1_08	74.9233252383752	-1.29074628600101	0.853887835616319	-1.5116110479187	0.130632839475157	0.999400262816908	NA	NA	NA
3	NME1_01	70.1164661455524	-0.738501069194738	0.876275910275848	-0.842772305542738	0.399355799594197	0.999400262816908	NA	NA	NA
4	NME1_02	802.56658811321	-0.711537292910289	0.35688451188433	-1.99374663011688	0.0461797506747715	0.870637601994823	NA	NA	NA
5	NME1_03	213.895320180433	1.29027473452411	0.506399763523142	2.5479370794871	0.010836201361873	0.542974255096959	NME1	NME1	RNA component of RNase MRP; RNase MRP cleaves pre-rRNA and has a role in cell cycle-regulated degradation of daughter cell-specific mRNAs; human ortholog is implicated in cartilage-hair hypoplasia (CHH)
6	No_gRNA 1	56.082827587814	-0.384224766414217	1.0122143289482	-0.379588349449142	0.704251010441913	0.999400262816908	NA	NA	NA
7	No_gRNA 105	79.2269597980106	-0.221365259419187	0.941534868249524	-0.235111058426061	0.81412253586341	0.999400262816908	NA	NA	NA
8	No_gRNA 109	30.5706003679201	-1.45915041921481	1.24246758066417	-1.17439717697489	0.240235975493804	0.999400262816908	NA	NA	NA
9	No_gRNA 112	69.1015176665417	0.671099989925652	0.965261547883267	0.695251967093598	0.486897410219273	0.999400262816908	NA	NA	NA
10	No_gRNA 113	119.083196212587	-0.996464182880791	0.698586120983177	-1.4264013454467	0.153752525562127	0.999400262816908	NA	NA	NA
11	No_gRNA 117	75.0124935388146	1.17235146976838	0.850622672836849	1.37822739412594	0.168133091904732	0.999400262816908	NA	NA	NA
12	No_gRNA 13	145.814062826461	-0.21437371107394	0.640966017896431	-0.334454097547148	0.738036923299832	0.999400262816908	NA	NA	NA
13	No_gRNA 134	49.6009733852256	1.64783973453692	1.06004574147543	1.55449870704953	0.120065504835629	0.999400262816908	NA	NA	NA
14	No_gRNA 140	82.7332647131888	-0.706393647838581	0.767993321243064	-0.919791394403302	0.357681781258779	0.999400262816908	NA	NA	NA
15	No_gRNA 142	146.195192911	-1.90144254959134	0.808080371053684	-2.35303642769095	0.0186208098007476	0.670566516365445	NA	NA	NA
16	No_gRNA 145	244.814905704433	-0.734046111072668	0.583770006395946	-1.25742347676355	0.208600332542203	0.999400262816908	NA	NA	NA
17	No_gRNA 146	210.40514392225	-1.0826983095414	0.60222711774147	-1.79782390670457	0.0722049176001602	0.947380003904402	NA	NA	NA
18	No_gRNA 150	85.8465325974785	0.612763772890701	0.888857691995285	0.689383439451578	0.490582002121392	0.999400262816908	NA	NA	NA
19	No_gRNA 161	60.0185181933102	-0.469890387994827	0.943223089838307	-0.498175238771327	0.618360533378603	0.999400262816908	NA	NA	NA
20	No_gRNA 162	80.9483100062811	0.972615159560262	1.07435146668937	0.905304446185929	0.365304121588602	0.999400262816908	NA	NA	NA
21	No_gRNA 163	39.5734285113994	-1.68331892037582	1.17753551045493	-1.42952709742528	0.152852792314487	0.999400262816908	NA	NA	NA
22	No_gRNA 167	26.8501151102177	0.761660846230434	1.23555400411788	0.616452897802893	0.537595650115217	0.999400262816908	NA	NA	NA
23	No_gRNA 172	342.774173720001	-0.353086933586104	0.496808000148169	-0.710711046281055	0.477263313074818	0.999400262816908	NA	NA	NA
24	No_gRNA 174	128.639663989359	0.222483359521031	0.776922120073185	0.286365072859649	0.774598522851876	0.999400262816908	NA	NA	NA
25	No_gRNA 175	165.560044318367	0.0469059527304118	0.611651371073848	0.0766873989803393	0.938872229175977	0.999400262816908	NA	NA	NA
26	No_gRNA 176	122.798399903734	1.01026437196822	0.699258072850073	1.44476611882438	0.148523590853289	0.999400262816908	NA	NA	NA
27	No_gRNA 177	284.839493845342	-0.881208607553331	0.48097716811025	-1.83212149344964	0.066933321809182	0.936749428286688	NA	NA	NA
28	No_gRNA 181	126.252493185954	0.561363604145687	0.707035530607178	0.793968025430925	0.427214045911392	0.999400262816908	NA	NA	NA
29	No_gRNA 184	154.204813141004	-0.777166299719968	0.654674907538121	-1.18710262264743	0.235187143994246	0.999400262816908	NA	NA	NA
30	No_gRNA 185	88.0722145181453	1.15128541763999	0.821428340477269	1.40156525031881	0.161045109924053	0.999400262816908	NA	NA	NA
31	No_gRNA 186	63.367666874088	-0.999940006354791	0.99179323470758	-1.00821418352346	0.313351650247563	0.999400262816908	NA	NA	NA
32	No_gRNA 19	99.7903265164736	-0.113907551195394	0.747067974670195	-0.152472807103906	0.878814036441716	0.999400262816908	NA	NA	NA
33	No_gRNA 190	71.788007556342	-0.867078944813689	0.877607495605188	-0.988003121162681	0.323151119615178	0.999400262816908	NA	NA	NA
34	No_gRNA 20	84.6998351343706	-1.36798008104266	0.781400364888501	-1.75067755597716	0.0800014675977077	0.962161681264777	NA	NA	NA
35	No_gRNA 209	156.608858323739	-0.476045732569578	0.698953531476037	-0.681083521481426	0.495818643293001	0.999400262816908	NA	NA	NA
36	No_gRNA 211	40.1412545151631	-0.706895416959725	1.12333180925362	-0.62928460775041	0.529162746475875	0.999400262816908	NA	NA	NA
37	No_gRNA 214	96.358266125465	-1.01164932755147	0.851539482513375	-1.18802398282875	0.234823961154211	0.999400262816908	NA	NA	NA
38	No_gRNA 215	113.179445583033	0.342805715100396	0.718728387567284	0.476961423856804	0.633389591442695	0.999400262816908	NA	NA	NA
39	No_gRNA 216	87.8302149866968	-0.207902943391833	1.04088095734634	-0.199737483834721	0.841685896566217	0.999400262816908	NA	NA	NA
40	No_gRNA 218	41.4562724338589	0.876580789468645	1.02989031720192	0.851139946484984	0.394691617545706	0.999400262816908	NA	NA	NA
41	No_gRNA 223	98.1423055842243	-0.361172274782352	0.883537348380733	-0.408779861365539	0.6827012201905	0.999400262816908	NA	NA	NA
42	No_gRNA 224	83.8186595452547	0.97816352561765	0.761929592078879	1.28379778891221	0.199212717453723	0.999400262816908	NA	NA	NA
43	No_gRNA 227	68.3645962399349	0.147344549323085	0.966348963645324	0.152475508192467	0.878811906191754	0.999400262816908	NA	NA	NA
44	No_gRNA 231	134.339757204401	0.369665719598515	0.624199517674846	0.592223654666583	0.553700831446176	0.999400262816908	NA	NA	NA
45	No_gRNA 238	78.131517438417	0.911989814522913	0.943506549829438	0.966596166913497	0.333745951531344	0.999400262816908	NA	NA	NA
46	No_gRNA 240	75.5362943110956	-0.806365614873226	0.794116370486722	-1.01542499920886	0.309903281358237	0.999400262816908	NA	NA	NA
47	No_gRNA 242	53.9384562367097	0.0844619087571199	0.971127596139283	0.0869730291806124	0.930692950447087	0.999400262816908	NA	NA	NA
48	No_gRNA 246	69.0421095458015	-1.0322959098229	0.946192142314199	-1.09100029862656	0.27527275118813	0.999400262816908	NA	NA	NA
49	No_gRNA 248	45.1446791247866	-1.85701704721709	1.07155150836785	-1.7330170623768	0.0830926361781347	0.965077106060191	NA	NA	NA
50	No_gRNA 26	75.8892931316887	0.478982424056093	0.80582822848964	0.594397673253327	0.552246164333388	0.999400262816908	NA	NA	NA
51	No_gRNA 263	57.5448629524223	0.63399267089821	0.913417065818811	0.69408892675974	0.487626442444744	0.999400262816908	NA	NA	NA
52	No_gRNA 264	74.5293485325442	-0.556741075907699	1.05051623886023	-0.529969033616979	0.596133401056816	0.999400262816908	NA	NA	NA
53	No_gRNA 266	41.1942877879885	-0.103751502797818	1.1148000229424	-0.0930673669381323	0.92585004229596	0.999400262816908	NA	NA	NA
54	No_gRNA 269	88.5251325819206	-1.07634511491419	0.776465001459606	-1.38621201585502	0.165682173489868	0.999400262816908	NA	NA	NA
55	No_gRNA 271	94.3572841014156	-0.475731822872699	0.856565021238083	-0.555394874968247	0.578624597320785	0.999400262816908	NA	NA	NA
56	No_gRNA 275	54.8040899227808	0.18977921987704	1.0845400923122	0.174985896069953	0.861090715902669	0.999400262816908	NA	NA	NA
57	No_gRNA 276	82.9169491052559	-0.12391478637395	1.02291099095441	-0.121139363512298	0.903580651169301	0.999400262816908	NA	NA	NA
58	No_gRNA 283	175.198321525275	0.480620838900846	0.624059534239483	0.770152225118329	0.441209599634177	0.999400262816908	NA	NA	NA
59	No_gRNA 285	45.9242286774048	-2.20699994529124	1.20326600713427	-1.8341745983064	0.0666280807954598	0.935015750965853	NA	NA	NA
60	No_gRNA 286	65.6641650833795	-1.39808299241523	1.10789559762188	-1.26192666115493	0.206975177385099	0.999400262816908	NA	NA	NA
61	No_gRNA 292	113.683254482168	0.873884214228819	0.670812242651194	1.30272550002224	0.192668493050741	0.999400262816908	NA	NA	NA
62	No_gRNA 297	152.774726672302	-0.628042180639529	0.669661835022563	-0.937849744144921	0.348321633053898	0.999400262816908	NA	NA	NA
63	No_gRNA 298	120.955698255712	-0.135327546335787	0.706899531743766	-0.191438160953316	0.84818232477798	0.999400262816908	NA	NA	NA
64	No_gRNA 303	81.8223869007454	-0.0150653699948224	0.891326466449914	-0.0169021907930397	0.986514645017359	0.999761532217726	NA	NA	NA
65	No_gRNA 305	100.462415784841	0.161656504281015	0.850409416193393	0.190092561538915	0.849236598841014	0.999400262816908	NA	NA	NA
66	No_gRNA 310	76.7594492655089	-0.120701284287994	0.838619339000203	-0.143928572446104	0.885556873039434	0.999400262816908	NA	NA	NA
67	No_gRNA 311	130.723520741088	0.0422828063261563	0.685683168224408	0.0616652242400067	0.950829434278028	0.999400262816908	NA	NA	NA
68	No_gRNA 313	105.032408269804	0.483962507312663	0.826583775324307	0.585497225762485	0.558213431455745	0.999400262816908	NA	NA	NA
69	No_gRNA 329	51.8642069886026	-1.27648702450184	1.03580209395212	-1.23236575013223	0.217812488930597	0.999400262816908	NA	NA	NA
70	No_gRNA 333	72.9434714844335	-1.18185079671743	1.01021506304326	-1.16990019249676	0.242041136429843	0.999400262816908	NA	NA	NA
71	No_gRNA 336	92.9760028546137	0.474582543582601	0.779399200832569	0.608908173212961	0.542585306446047	0.999400262816908	NA	NA	NA
72	No_gRNA 344	95.2751363065512	0.202461811330737	0.792646701828883	0.255425034714198	0.798394837000845	0.999400262816908	NA	NA	NA
73	No_gRNA 35	183.607484342041	0.144837737752523	0.63959487207066	0.226452312357693	0.820849645069859	0.999400262816908	NA	NA	NA
74	No_gRNA 353	85.7984059568604	-0.49587948461382	0.950990195555856	-0.521434907458723	0.60206383944903	0.999400262816908	NA	NA	NA
75	No_gRNA 355	116.318261888445	-1.36459196042833	0.80556707058052	-1.69395201251829	0.0902744021486249	0.98437654419502	NA	NA	NA
76	No_gRNA 359	85.3100106055722	-0.142024708309044	0.862350565060647	-0.164694863160501	0.869184160373335	0.999400262816908	NA	NA	NA
77	No_gRNA 362	196.542538341586	1.04110190988059	0.666474648048198	1.56210279405151	0.118263774789458	0.999400262816908	NA	NA	NA
78	No_gRNA 363	144.601352633046	-0.109299607280109	0.670369801165694	-0.16304375150857	0.8704839868179	0.999400262816908	NA	NA	NA
79	No_gRNA 368	135.765938506236	-0.921824031315201	0.660298843794462	-1.39607094572188	0.162693132026192	0.999400262816908	NA	NA	NA
80	No_gRNA 37	136.001375995907	0.423627445393236	0.726410756892636	0.583178926486972	0.559772855970227	0.999400262816908	NA	NA	NA
81	No_gRNA 371	56.5187988254915	0.815221585442185	1.0491944902262	0.776997585325126	0.437160194957138	0.999400262816908	NA	NA	NA
82	No_gRNA 377	82.2475940588382	-0.194743652494786	0.841943766642885	-0.231302445852524	0.817079846687731	0.999400262816908	NA	NA	NA
83	No_gRNA 380	69.710482675944	-0.623044558244402	0.879070557253529	-0.708753754864653	0.478477300233651	0.999400262816908	NA	NA	NA
84	No_gRNA 389	56.7917259595236	0.0161742385318734	1.01843153504288	0.0158815177803704	0.987328914818855	0.999761532217726	NA	NA	NA
85	No_gRNA 39	123.834871806011	-1.57060378904022	0.857772334093562	-1.83102640014606	0.0670966027125462	0.937680721939773	NA	NA	NA
86	No_gRNA 394	33.4878109436451	-0.97516464207568	1.26650014310568	-0.769968047286914	0.441318846932684	0.999400262816908	NA	NA	NA
87	No_gRNA 4	123.040757776827	-1.20948901963627	0.76847852276277	-1.5738748498631	0.115516385344722	0.999400262816908	NA	NA	NA
88	No_gRNA 402	222.856439219482	-0.544687369407585	0.589905295330567	-0.923347143548453	0.355826327314062	0.999400262816908	NA	NA	NA
89	No_gRNA 404	199.204229994125	-0.195375089591967	0.565212219393673	-0.3456667830033	0.729593150436113	0.999400262816908	NA	NA	NA
90	No_gRNA 406	191.716999704017	-0.509706064494314	0.553552689895369	-0.920790511542193	0.357159809779054	0.999400262816908	NA	NA	NA
91	No_gRNA 408	184.613156485741	0.0546008033449181	0.584143833824799	0.0934715051041597	0.925528986200083	0.999400262816908	NA	NA	NA
92	No_gRNA 414	43.8088947937752	-0.389219362361985	1.14340279267633	-0.34040441815867	0.733551991942587	0.999400262816908	NA	NA	NA
93	No_gRNA 418	86.4958942533534	0.184269212101861	0.883832287778567	0.208488889407973	0.834847257006221	0.999400262816908	NA	NA	NA
94	No_gRNA 430	138.675738764148	-0.191147401220911	0.751738577971357	-0.254273768597511	0.799284063580879	0.999400262816908	NA	NA	NA
95	No_gRNA 433	66.151782269077	-1.29889288566287	0.991614040921835	-1.30987746447739	0.190237291891091	0.999400262816908	NA	NA	NA
96	No_gRNA 434	95.3078942559215	0.209442752352126	0.821058326603264	0.255088762352116	0.798654543471401	0.999400262816908	NA	NA	NA
97	No_gRNA 439	57.0374662875662	-1.15079489857692	1.0303763847297	-1.1168684721737	0.264050566751201	0.999400262816908	NA	NA	NA
98	No_gRNA 441	72.0680002689874	-0.675699746098181	0.902967375866052	-0.748310253678994	0.454273041143011	0.999400262816908	NA	NA	NA
99	No_gRNA 442	56.3120025764533	0.58818244994597	0.893960223432598	0.657951477625579	0.510569310866672	0.999400262816908	NA	NA	NA
100	No_gRNA 444	100.828057106147	-0.571257995854438	0.793206017397145	-0.720188681534445	0.471408831753425	0.999400262816908	NA	NA	NA
101	No_gRNA 445	60.772412263101	0.738588535715221	0.880775787352095	0.838565894205226	0.401712956127138	0.999400262816908	NA	NA	NA
102	No_gRNA 447	90.7677144888429	0.397634240150378	0.898471768508235	0.442567317179687	0.658078728981137	0.999400262816908	NA	NA	NA
103	No_gRNA 466	95.1097883564795	-0.381570093175051	0.742033989098969	-0.514221853419923	0.607096890597562	0.999400262816908	NA	NA	NA
104	No_gRNA 469	56.7612501742943	-1.14849386354292	1.20537095279835	-0.952813622127373	0.34068451112058	0.999400262816908	NA	NA	NA
105	No_gRNA 475	41.8983871039825	0.45199452765283	1.21200851381949	0.37293015890493	0.709200425037729	0.999400262816908	NA	NA	NA
106	No_gRNA 476	72.0333909378729	-0.488012514523139	0.886460307882915	-0.550518179080835	0.581964011570677	0.999400262816908	NA	NA	NA
107	No_gRNA 480	38.2091646405594	-0.447627965705888	1.13575300823868	-0.394124393647935	0.693489202052178	0.999400262816908	NA	NA	NA
108	No_gRNA 481	110.236805500323	0.360054735824852	0.72089230605066	0.499457037899846	0.617457445592114	0.999400262816908	NA	NA	NA
109	No_gRNA 483	35.9509927571179	0.765631790726627	1.15669461925875	0.661913505932334	0.508026655578336	0.999400262816908	NA	NA	NA
110	No_gRNA 490	76.7551345426672	-0.124442935311426	0.847271522531153	-0.146874917900773	0.883230749807265	0.999400262816908	NA	NA	NA
111	No_gRNA 491	71.7544954226466	-0.142238611415299	0.955954608317212	-0.148792223163906	0.881717587344929	0.999400262816908	NA	NA	NA
112	No_gRNA 493	115.906284027075	0.41312284286623	0.716417163269464	0.576651236244662	0.564175080042137	0.999400262816908	NA	NA	NA
113	No_gRNA 495	74.092366877677	-0.699943744642533	0.881011139169083	-0.794477746674893	0.426917358931628	0.999400262816908	NA	NA	NA
114	No_gRNA 498	110.985805762467	0.973225194935484	0.772230382385904	1.26027830183083	0.207568984594242	0.999400262816908	NA	NA	NA
115	No_gRNA 50	87.0667349762506	0.223235524226913	0.779017034882876	0.286560516947458	0.774448849910595	0.999400262816908	NA	NA	NA
116	No_gRNA 501	85.609804432763	-1.55321752686725	1.10804204647063	-1.40176767823442	0.160984633230436	0.999400262816908	NA	NA	NA
117	No_gRNA 503	70.7613108743665	0.196074279793524	0.850347676849396	0.230581308247933	0.817640090194675	0.999400262816908	NA	NA	NA
118	No_gRNA 505	69.057865650453	-1.19504771709452	1.11283948651479	-1.07387249605708	0.282879831951304	0.999400262816908	NA	NA	NA
119	No_gRNA 507	104.591379068214	0.0367822178726361	0.910872170173657	0.0403813170245651	0.967789124953698	0.999400262816908	NA	NA	NA
120	No_gRNA 508	89.7751467656811	1.12169798684644	0.842570192413715	1.33128135429655	0.183096451067195	0.999400262816908	NA	NA	NA
121	No_gRNA 51	41.4499299178702	0.23335017474232	1.03593057395638	0.225256576655635	0.821779678378228	0.999400262816908	NA	NA	NA
122	No_gRNA 512	65.7128887413218	0.0566156673422902	0.967531039750613	0.0585156083022238	0.953337930170102	0.999400262816908	NA	NA	NA
123	No_gRNA 514	59.2706852218868	-1.00726718171461	0.945615821574222	-1.06519704803347	0.286786769198045	0.999400262816908	NA	NA	NA
124	No_gRNA 518	86.7131932589979	-1.19295043001357	0.899717821089806	-1.32591619511169	0.1848674579756	0.999400262816908	NA	NA	NA
125	No_gRNA 520	126.038066363004	-0.337083968166029	0.774869174021984	-0.435020490512462	0.663547554346208	0.999400262816908	NA	NA	NA
126	No_gRNA 524	132.492888599303	-0.416916192519614	0.714804555558024	-0.583259003146869	0.559718956486944	0.999400262816908	NA	NA	NA
127	No_gRNA 525	126.211393839498	-0.131099947907556	0.736436606246601	-0.178019325486458	0.858707798610166	0.999400262816908	NA	NA	NA
128	No_gRNA 53	100.988098544233	-0.0308902554299891	0.866784754230306	-0.0356377466022914	0.971571209990869	0.999400262816908	NA	NA	NA
129	No_gRNA 530	69.4985945674722	0.802348334569364	0.980454123282527	0.818343577242685	0.413161029744538	0.999400262816908	NA	NA	NA
130	No_gRNA 545	58.5156137618912	-0.0230530864827627	0.985215487564326	-0.0233990297287704	0.981331978959511	0.999761532217726	NA	NA	NA
131	No_gRNA 547	84.2279280471356	-0.122352362211613	0.968570219357858	-0.126322655566191	0.899476523361066	0.999400262816908	NA	NA	NA
132	No_gRNA 552	27.0331557574799	0.943487901759768	1.17571135681516	0.802482595996645	0.422273851879464	0.999400262816908	NA	NA	NA
133	No_gRNA 553	59.6946446921351	0.47465651333697	0.961496059600078	0.493664543497347	0.621543109733433	0.999400262816908	NA	NA	NA
134	No_gRNA 557	187.694287970697	-0.167363316435326	0.647059437199912	-0.258652152821656	0.795903639958333	0.999400262816908	NA	NA	NA
135	No_gRNA 559	91.3296451400744	-0.843598400458838	0.90585632062533	-0.93127174944972	0.351713011519303	0.999400262816908	NA	NA	NA
136	No_gRNA 56	90.4250506949247	0.183598224179294	0.790253981310402	0.232328123010339	0.816283170937589	0.999400262816908	NA	NA	NA
137	No_gRNA 560	63.9046632371021	-0.202223565412612	1.10578095130134	-0.18287850335514	0.854893350271697	0.999400262816908	NA	NA	NA
138	No_gRNA 568	53.5149382479533	0.285021823109338	0.982114105585398	0.290212533847529	0.771653648027232	0.999400262816908	NA	NA	NA
139	No_gRNA 573	95.0478769428967	1.02091371614128	0.914675373857792	1.11614868544608	0.26435849534134	0.999400262816908	NA	NA	NA
140	No_gRNA 574	90.3115967780019	-1.33012549938058	0.859741442436837	-1.54712269727337	0.121833661775282	0.999400262816908	NA	NA	NA
141	No_gRNA 575	203.214959889105	-0.607023632188767	0.573978863590568	-1.05757140322465	0.29025088562519	0.999400262816908	NA	NA	NA
142	No_gRNA 578	63.9160135610212	-0.111614819889359	0.970608698542236	-0.114994662686409	0.908449352538958	0.999400262816908	NA	NA	NA
143	No_gRNA 579	132.935215142974	-1.2275538686902	0.79457009985374	-1.54492834416518	0.122363596607791	0.999400262816908	NA	NA	NA
144	No_gRNA 582	46.154717978216	-0.4507155318567	0.961962520756033	-0.468537517971563	0.639400247616003	0.999400262816908	NA	NA	NA
145	No_gRNA 589	43.7678912510412	-0.881368670680551	1.18608072107587	-0.743093328320079	0.457425178598567	0.999400262816908	NA	NA	NA
146	No_gRNA 594	64.8072130153284	-1.10214081432632	0.991843373269963	-1.11120449460959	0.26648033704038	0.999400262816908	NA	NA	NA
147	No_gRNA 596	107.43001936176	0.588282927248736	0.748494526665533	0.785954881820548	0.43189392014869	0.999400262816908	NA	NA	NA
148	No_gRNA 597	66.0291029605025	-1.49957500867222	0.873567620849709	-1.71661010880143	0.0860504342284118	0.975530227151113	NA	NA	NA
149	No_gRNA 60	144.612231567645	0.560271751351505	0.727333384942489	0.770309410994254	0.441116375194226	0.999400262816908	NA	NA	NA
150	No_gRNA 600	43.9643997961603	1.06294533895563	1.17935188060957	0.901296174985727	0.367430866977678	0.999400262816908	NA	NA	NA
151	No_gRNA 604	86.0554386841541	0.323026087197678	0.916610159227621	0.35241381949102	0.724527939486415	0.999400262816908	NA	NA	NA
152	No_gRNA 605	45.4529215540402	1.61516553860289	1.02472221932276	1.57619841567441	0.11498008354837	0.999400262816908	NA	NA	NA
153	No_gRNA 607	137.678292671883	-0.264520666747355	0.740471052907286	-0.357232960976364	0.720917412362071	0.999400262816908	NA	NA	NA
154	No_gRNA 612	68.5224113133659	-0.534276685119642	1.09238455219064	-0.489092127903324	0.624776474420418	0.999400262816908	NA	NA	NA
155	No_gRNA 616	115.769110455331	-1.02916397192296	1.02277038634023	-1.00625124237865	0.314294728245931	0.999400262816908	NA	NA	NA
156	No_gRNA 618	54.5066676009056	-0.417896338002734	1.01369476790044	-0.41225066088511	0.680155708169715	0.999400262816908	NA	NA	NA
157	No_gRNA 624	41.2479998398291	-1.01197797329956	1.19518491926206	-0.846712468497661	0.39715540722644	0.999400262816908	NA	NA	NA
158	No_gRNA 633	135.991121008048	-0.777457225018505	0.787550226074783	-0.987184308096028	0.323552293028514	0.999400262816908	NA	NA	NA
159	No_gRNA 635	59.1672461141336	-2.98650977325824	1.00764964051433	-2.96383748197822	0.00303828701275608	0.271029843884892	NA	NA	NA
160	No_gRNA 636	160.898929058584	-0.380605957247808	0.692525091183773	-0.549591577392837	0.582599537081386	0.999400262816908	NA	NA	NA
161	No_gRNA 638	124.689156813321	-0.225533205275911	0.710282784302047	-0.317525935106999	0.750844563485453	0.999400262816908	NA	NA	NA
162	No_gRNA 643	77.4425966637406	0.861083475602998	1.01146760548037	0.851320863799734	0.394591138204326	0.999400262816908	NA	NA	NA
163	No_gRNA 645	93.9273164983238	-0.216664294002074	0.878577263232657	-0.246608127787048	0.80521151373235	0.999400262816908	NA	NA	NA
164	No_gRNA 646	128.690721836407	0.713799965757128	0.784202314550837	0.910224252737595	0.362704256320357	0.999400262816908	NA	NA	NA
165	No_gRNA 653	66.594923377953	0.267332715799376	0.987529411634727	0.270708611459826	0.786615153056984	0.999400262816908	NA	NA	NA
166	No_gRNA 656	26.7602793039237	0.99141820594788	1.24236617845551	0.798008045567044	0.424865821206366	0.999400262816908	NA	NA	NA
167	No_gRNA 661	173.439186008843	-0.482308338024092	0.738924867602708	-0.652716343934727	0.513939163823458	0.999400262816908	NA	NA	NA
168	No_gRNA 662	211.032592280539	-0.156491486407675	0.610242137631247	-0.256441626622379	0.797609848775951	0.999400262816908	NA	NA	NA
169	No_gRNA 673	178.521801472066	-0.765496342391977	0.689314125081664	-1.11051886873969	0.266775501860866	0.999400262816908	NA	NA	NA
170	No_gRNA 674	102.937053609402	1.61992593750428	0.713346195581477	2.27088326472929	0.0231540456081149	0.722125331434215	NA	NA	NA
171	No_gRNA 679	135.84671744408	-0.316217231262166	0.682009364765719	-0.463655262814158	0.642894754182074	0.999400262816908	NA	NA	NA
172	No_gRNA 682	129.811837498953	0.792027489006098	0.601377932865566	1.31702120367484	0.187831517246862	0.999400262816908	NA	NA	NA
173	No_gRNA 683	62.5266972828896	0.708502358944602	0.842116541743331	0.841335282973869	0.400160129823335	0.999400262816908	NA	NA	NA
174	No_gRNA 686	41.7270066647074	-1.17682506426272	1.06181140541512	-1.10831834943667	0.267724353570831	0.999400262816908	NA	NA	NA
175	No_gRNA 688	130.474507473638	-0.513298811928101	0.659661894049433	-0.778124091384359	0.436495861421247	0.999400262816908	NA	NA	NA
176	No_gRNA 698	37.714135696867	-0.876570224929624	1.19097235403236	-0.736012235684362	0.461723251522369	0.999400262816908	NA	NA	NA
177	No_gRNA 699	91.8072485991468	-1.01764849318753	0.882044820125064	-1.15373784865403	0.248607661729353	0.999400262816908	NA	NA	NA
178	No_gRNA 70	186.119368489576	-0.0132495771068479	0.574108722749493	-0.0230785155874199	0.981587643199469	0.999761532217726	NA	NA	NA
179	No_gRNA 700	48.9555326532202	0.498398191457633	1.13923076994318	0.437486595874243	0.661758494967793	0.999400262816908	NA	NA	NA
180	No_gRNA 714	116.337768825474	-0.426625659921405	0.814602477959724	-0.523722516766636	0.600471552149637	0.999400262816908	NA	NA	NA
181	No_gRNA 716	97.4163858252696	0.675947091291245	0.799550652099462	0.845408717404384	0.397882678979728	0.999400262816908	NA	NA	NA
182	No_gRNA 717	64.1742530615775	-0.94593121540663	0.974297804614989	-0.970885093783446	0.331605501824107	0.999400262816908	NA	NA	NA
183	No_gRNA 718	64.6281382508384	-0.137011117666689	0.91011871491336	-0.150542028662417	0.880336994456228	0.999400262816908	NA	NA	NA
184	No_gRNA 719	86.0983861128135	1.20159575041903	0.831049852952827	1.44587685822891	0.148211743815692	0.999400262816908	NA	NA	NA
185	No_gRNA 723	61.0124923341477	0.528539951631651	1.14880858747274	0.460076602312302	0.645461237817157	0.999400262816908	NA	NA	NA
186	No_gRNA 731	75.4205499406177	-1.24194134330334	0.874657514239174	-1.41991730830055	0.155631756357109	0.999400262816908	NA	NA	NA
187	No_gRNA 732	129.257286510091	-0.201383678864255	0.74087643167562	-0.271818174062833	0.785761830303038	0.999400262816908	NA	NA	NA
188	No_gRNA 74	132.350161033388	-0.694231567407423	0.71883311966348	-0.965775711242167	0.334156424835271	0.999400262816908	NA	NA	NA
189	No_gRNA 751	76.015941711105	-0.0127402509749591	0.976330318329054	-0.013049119479116	0.98958860451095	0.999761532217726	NA	NA	NA
190	No_gRNA 752	142.983252695652	0.184775680738248	0.735527267671097	0.251215269453306	0.801647679714726	0.999400262816908	NA	NA	NA
191	No_gRNA 756	154.12618734566	-0.353321202687237	0.627802789257467	-0.562790112967047	0.573577813607619	0.999400262816908	NA	NA	NA
192	No_gRNA 759	73.8183907905061	1.33121268089498	0.935933243911696	1.42233721214051	0.154928381036147	0.999400262816908	NA	NA	NA
193	No_gRNA 76	74.6908793121128	-0.391263443222084	0.88045345953429	-0.444388557947219	0.65676168448919	0.999400262816908	NA	NA	NA
194	No_gRNA 762	176.998013856543	0.0764679318209508	0.715429320715505	0.106883978062955	0.914881024023983	0.999400262816908	NA	NA	NA
195	No_gRNA 763	83.9889460409934	-1.94697732311239	0.952711789472567	-2.04361627999823	0.0409914696992434	0.8490845192967	NA	NA	NA
196	No_gRNA 767	47.1769764069551	-0.315992286573001	1.00875563524976	-0.313249587443211	0.754091047395635	0.999400262816908	NA	NA	NA
197	No_gRNA 774	51.3741365998162	-1.0097722867143	0.970926562928044	-1.04000892062228	0.298335756213514	0.999400262816908	NA	NA	NA
198	No_gRNA 775	135.469640668227	-0.0418930906615489	0.662279067886089	-0.0632559485765816	0.949562693418073	0.999400262816908	NA	NA	NA
199	No_gRNA 778	111.526415968466	0.446911668714914	0.732276132883302	0.610304840819023	0.541659890834457	0.999400262816908	NA	NA	NA
200	No_gRNA 783	53.329837761545	-1.05095097625731	1.01170321796989	-1.03879374661491	0.298900670292845	0.999400262816908	NA	NA	NA
201	No_gRNA 784	199.160071910043	-1.41141010612842	0.679899009663299	-2.07591140164681	0.0379021460074986	0.834559957412251	NA	NA	NA
202	No_gRNA 786	169.606227311335	1.40833064552619	0.669665100082144	2.10303724257609	0.0354625140827422	0.818978335210928	NA	NA	NA
203	No_gRNA 8	144.48360068271	-0.481201743953338	0.68636540018008	-0.701086831922306	0.483248827613767	0.999400262816908	NA	NA	NA
204	No_gRNA 80	87.9412042110545	-0.734997874717197	0.923749294072773	-0.795668131421916	0.426224954663796	0.999400262816908	NA	NA	NA
205	No_gRNA 82	71.8039867403851	-0.563880671223283	0.867760310102675	-0.649811548947847	0.515813958028789	0.999400262816908	NA	NA	NA
206	No_gRNA 85	60.3743219070337	1.1228226988981	0.963605439066103	1.16523076082499	0.243925597306207	0.999400262816908	NA	NA	NA
207	No_gRNA 89	64.6211104894052	-0.541959677826639	1.13280242390384	-0.478423833133187	0.632348573818162	0.999400262816908	NA	NA	NA
208	No_gRNA 92	50.4642825889956	-0.466855185326921	0.959393025647327	-0.486615154422163	0.626531082138333	0.999400262816908	NA	NA	NA
209	No_gRNA 93	115.00966796456	-0.85200608484668	0.780938916662236	-1.09100221114372	0.275271909640751	0.999400262816908	NA	NA	NA
210	No_gRNA 95	162.989518017759	0.26521941715613	0.686430598264776	0.386374700991734	0.699219183865477	0.999400262816908	NA	NA	NA
211	Q0010_00	258.585845030279	-0.197042565058894	0.540102315135124	-0.364824514795123	0.715242404357301	0.999400262816908	NA	NA	NA
212	Q0010_02	172.666194904143	-0.319686863487713	0.648301269419019	-0.493114665307077	0.62193156917561	0.999400262816908	NA	NA	NA
213	Q0010_03	68.2889615268894	-0.379368108483652	0.920068550856148	-0.412325916509851	0.680100555316556	0.999400262816908	NA	NA	NA
214	Q0010_04	265.252355153323	0.350937966054574	0.555755462734237	0.631461118399107	0.527739064395739	0.999400262816908	NA	NA	NA
215	Q0010_05	160.059354394371	0.331464067783939	0.684905892099138	0.483955637712576	0.628417353172578	0.999400262816908	NA	NA	NA
216	Q0010_06	174.419953264392	0.924270394165928	0.561027039490763	1.64746140400804	0.0994632431042489	0.999400262816908	NA	NA	NA
217	Q0010_07	203.975740015166	0.452632158901359	0.522953205549536	0.865530900466934	0.386747463329183	0.999400262816908	NA	NA	NA
218	Q0010_08	246.539147373244	-0.619813301138805	0.486815312982912	-1.27320009171643	0.2029470480519	0.999400262816908	NA	NA	NA
219	Q0017_00	83.0796598819667	0.327047848887795	0.823093229770109	0.397339981740756	0.691116767739092	0.999400262816908	NA	NA	NA
220	Q0017_01	156.329816345592	-0.586381225641956	0.670520306469143	-0.874516729746411	0.381836913474905	0.999400262816908	NA	NA	NA
221	Q0017_02	376.453129215413	0.00151031038308169	0.544597604144621	0.00277325932319125	0.997787262039273	0.999798556814869	NA	NA	NA
222	Q0017_04	132.176136042565	-0.255359586343177	0.672065618145338	-0.379962282623352	0.703973413253634	0.999400262816908	NA	NA	NA
223	Q0017_05	471.406150924414	0.340830999845027	0.414916660082248	0.821444479422602	0.411393136638298	0.999400262816908	NA	NA	NA
224	Q0017_06	798.510138689534	-0.0789237363386091	0.311834575182445	-0.253094886262799	0.800194890435874	0.999400262816908	NA	NA	NA
225	Q0017_07	320.29323794791	0.232450402265933	0.463764631927913	0.501224945290923	0.616212820220845	0.999400262816908	NA	NA	NA
226	Q0017_08	96.8946223109728	0.433357036073194	0.854543503217608	0.507121093825507	0.612069855294859	0.999400262816908	NA	NA	NA
227	Q0017_09	119.847355227181	0.152851913838833	0.677916666939661	0.225473013562061	0.821611316941126	0.999400262816908	NA	NA	NA
228	Q0032_00	205.735057636782	-0.248292019868664	0.567778743414855	-0.437304183625005	0.661890761690977	0.999400262816908	NA	NA	NA
229	Q0032_02	199.671249607809	0.249070703119842	0.54249843923207	0.459117824324826	0.646149557483807	0.999400262816908	NA	NA	NA
230	Q0032_04	62.322417939341	-0.463168165939978	0.887356787679548	-0.521963850810417	0.601695500026001	0.999400262816908	NA	NA	NA
231	Q0032_05	207.688672544242	-0.459342681682151	0.542118513074576	-0.847310450766624	0.39682210304203	0.999400262816908	NA	NA	NA
232	Q0045_01	625.597574830013	-0.0807712718618286	0.335520407696672	-0.240734304110795	0.809761049865741	0.999400262816908	NA	NA	NA
233	Q0075_01	114.5239169239	-0.121830682681455	0.700334842648703	-0.173960618924348	0.861896411811573	0.999400262816908	NA	NA	NA
234	Q0075_02	487.775903493052	0.595857743074581	0.44008442981093	1.35396233702377	0.175748393891744	0.999400262816908	NA	NA	NA
235	Q0075_05	472.740167043495	-0.0776103895878999	0.38593615716317	-0.201096445998676	0.840623160914291	0.999400262816908	NA	NA	NA
236	Q0075_06	68.1182281921775	0.441128564859652	0.910148086588921	0.484677791844761	0.627904922265634	0.999400262816908	NA	NA	NA
237	Q0080_01	53.9978882615813	0.2099812051045	0.967713697107723	0.21698691021124	0.82821854606432	0.999400262816908	NA	NA	NA
238	Q0080_03	252.663334557529	-0.291397869970672	0.526651202092692	-0.55330334159075	0.580055713270842	0.999400262816908	NA	NA	NA
239	Q0080_04	438.906170901902	-0.179415535598623	0.424704183077268	-0.422448242206226	0.67269787170835	0.999400262816908	NA	NA	NA
240	Q0080_06	148.257095117863	0.761815763376731	0.635501949981165	1.19876227507927	0.230620395319389	0.999400262816908	NA	NA	NA
241	Q0085_00	39.3715271554807	-0.403597651022835	1.15247989900478	-0.350199297507366	0.726189133934548	0.999400262816908	NA	NA	NA
242	Q0085_01	352.370850517017	0.531539535180158	0.593621056744225	0.895418936274669	0.370563181719674	0.999400262816908	NA	NA	NA
243	Q0085_02	109.404849999599	-0.456435042962736	0.726990715602497	-0.627841639744275	0.530107685292764	0.999400262816908	NA	NA	NA
244	Q0085_05	273.963142842599	-0.0381140545888342	0.507372063039332	-0.0751205227195954	0.940118819189721	0.999400262816908	NA	NA	NA
245	Q0085_07	104.205523938185	-1.21315538302669	0.913702031563712	-1.32773633101209	0.184265226890476	0.999400262816908	NA	NA	NA
246	Q0085_08	103.203163485252	0.994858043673406	0.907720098931876	1.09599649147801	0.273080309884139	0.999400262816908	NA	NA	NA
247	Q0085_09	255.942084108888	-0.175837095888965	0.478508918797932	-0.367468795212193	0.713269363997586	0.999400262816908	NA	NA	NA
248	Q0092_00	59.9387728015623	0.443321397704736	0.988554377956279	0.44845423538688	0.653825407510441	0.999400262816908	NA	NA	NA
249	Q0092_01	204.727218032803	-0.759682331310484	0.678069468876925	-1.12036062111561	0.262560118652012	0.999400262816908	NA	NA	NA
250	Q0092_02	116.379489948243	0.159144756300014	0.707563271770824	0.224919470313547	0.822041922221236	0.999400262816908	NA	NA	NA
251	Q0092_04	206.928234128477	0.578888831881584	0.491610207405329	1.17753623330342	0.238981544371019	0.999400262816908	NA	NA	NA
252	Q0092_06	65.4012236965523	0.0523176308619112	0.835559952463207	0.0626138563817956	0.950073995272127	0.999400262816908	NA	NA	NA
253	Q0092_07	225.715557205613	-0.612155357145265	0.508518568915743	-1.20380138418641	0.228666354583102	0.999400262816908	NA	NA	NA
254	Q0092_08	133.077530563908	-0.328621945609976	0.712842763387432	-0.461002008420992	0.644797164161225	0.999400262816908	NA	NA	NA
255	Q0105_00	243.948302782575	0.0206635676859971	0.515382308354354	0.0400936690123825	0.968018449141278	0.999400262816908	NA	NA	NA
256	Q0105_01	570.277242706915	0.306243342067424	0.359724490509643	0.851327474628014	0.394587466921371	0.999400262816908	NA	NA	NA
257	Q0105_02	772.126397626105	-0.0529178035792554	0.44344732289992	-0.119332783955487	0.905011711223732	0.999400262816908	NA	NA	NA
258	Q0105_03	572.661388298608	0.364748569507951	0.433736703735097	0.840944670734435	0.40037893150756	0.999400262816908	NA	NA	NA
259	Q0105_04	158.832274267899	0.235755328946556	0.602586675056135	0.39123886854052	0.695620680441793	0.999400262816908	NA	NA	NA
260	Q0105_05	183.157863483188	0.0205052861907814	0.55741521424046	0.0367863769537079	0.970655336313345	0.999400262816908	NA	NA	NA
261	Q0105_06	211.632285319019	0.0850221955223861	0.514718807860928	0.165181831757269	0.868800864982832	0.999400262816908	NA	NA	NA
262	Q0105_07	721.616098797492	0.21279007028376	0.334628464199138	0.635899491673633	0.524841934020372	0.999400262816908	NA	NA	NA
263	Q0105_08	88.2102534591344	-0.00445699222279781	1.00909353451148	-0.00441682764814812	0.996475892870081	0.999798556814869	NA	NA	NA
264	Q0105_09	113.366131145991	-0.433687648484616	0.670131225550294	-0.647168243993531	0.517523061447715	0.999400262816908	NA	NA	NA
265	Q0130_00	202.616118822642	-0.74352154015955	0.556293937503552	-1.33656236394775	0.181365531011707	0.999400262816908	NA	NA	NA
266	Q0140_00	286.752182405239	-0.0391889175733576	0.527271781401737	-0.07432394252007	0.940752626340286	0.999400262816908	NA	NA	NA
267	Q0140_02	81.4490553244725	2.00821010345394	0.830464891945085	2.41817579879913	0.0155985386844699	0.629217652078278	NA	NA	NA
268	Q0142_02	79.8488466348234	0.488471654686831	0.792752814837375	0.616171454133576	0.537781366484722	0.999400262816908	NA	NA	NA
269	Q0142_03	93.1337507269924	0.180676145798442	0.659857138965619	0.273811004123812	0.784229866622475	0.999400262816908	NA	NA	NA
270	Q0142_06	194.705739847562	-0.228386596066268	0.578226608732442	-0.394977665533112	0.692859371007151	0.999400262816908	NA	NA	NA
271	Q0142_07	339.0407237673	0.308448655089122	0.50289448213756	0.613346668227611	0.53964714176222	0.999400262816908	NA	NA	NA
272	Q0142_09	145.334451219149	0.319033097135368	0.591950166423164	0.538952626811668	0.589919542858454	0.999400262816908	NA	NA	NA
273	Q0143_01	389.624531479586	0.0615832935392111	0.400920635442882	0.153604699022744	0.877921431631299	0.999400262816908	NA	NA	NA
274	Q0143_03	135.726164310558	0.342699266327079	0.727073845623402	0.471340385010335	0.637397680493055	0.999400262816908	NA	NA	NA
275	Q0143_04	104.801990634465	0.794006920261198	0.84521929809588	0.93940936044639	0.347520608959936	0.999400262816908	NA	NA	NA
276	Q0143_05	65.2426752868677	-0.502005965086083	1.08794616708072	-0.461425372206708	0.644493451691558	0.999400262816908	NA	NA	NA
277	Q0143_06	157.326863748754	-0.107664851242	0.637706176822978	-0.168831438607637	0.865929228847547	0.999400262816908	NA	NA	NA
278	Q0143_07	120.788316687432	0.620568461232385	0.757172519455957	0.819586613732727	0.41245180734364	0.999400262816908	NA	NA	NA
279	Q0143_08	378.15852911668	-0.41206828592516	0.486646762937467	-0.846750286466223	0.397134323194307	0.999400262816908	NA	NA	NA
280	Q0143_09	124.535074594577	0.250226407313945	0.592938741835127	0.422010554647689	0.673017313517903	0.999400262816908	NA	NA	NA
281	Q0144_01	203.412761043407	-0.726669565113381	0.60315370141047	-1.2047833966932	0.228286931222185	0.999400262816908	NA	NA	NA
282	Q0144_02	289.064740930002	-0.11579010135873	0.467296078182264	-0.247787445187091	0.804298869354115	0.999400262816908	NA	NA	NA
283	Q0144_03	86.4012347668459	0.257525654438004	0.697377231588846	0.369277405072832	0.711920965383583	0.999400262816908	NA	NA	NA
284	Q0144_04	99.443147779231	0.850621368006422	0.78011069913691	1.09038546573906	0.275543381485181	0.999400262816908	NA	NA	NA
285	Q0144_05	39.0106327091703	1.24764469159436	1.05971520309373	1.17733961724054	0.239059980254629	0.999400262816908	NA	NA	NA
286	Q0144_06	140.403969212333	-0.461949811639866	0.678948758772326	-0.680389802133467	0.496257676440121	0.999400262816908	NA	NA	NA
287	Q0144_08	373.691958870016	-0.348518317243034	0.459825816190728	-0.757935515953012	0.448489587236735	0.999400262816908	NA	NA	NA
288	Q0144_09	135.452899484775	0.496728327492302	0.649785056837503	0.76445021667607	0.444598993075458	0.999400262816908	NA	NA	NA
289	Q0160_00	393.367180652046	0.460567866554019	0.387223711771611	1.18941028803956	0.234278254356095	0.999400262816908	NA	NA	NA
290	Q0160_01	70.7298806474763	-1.86674935343152	0.825996943968148	-2.2599954722151	0.0238215318503601	0.733564353250616	NA	NA	NA
291	Q0160_02	197.789459661223	-1.06463527305322	0.542028638098114	-1.96416793914956	0.0495106195215475	0.886742784034531	NA	NA	NA
292	Q0160_05	218.626850829675	0.0128899688155613	0.523868574413222	0.0246053484502276	0.980369753146093	0.999729202745466	NA	NA	NA
293	Q0160_06	192.954212424041	-0.403680922954562	0.501363063231273	-0.805166859227418	0.420723397969627	0.999400262816908	NA	NA	NA
294	Q0160_07	181.130258222081	0.0445463219670618	0.534797912460335	0.0832956167725613	0.933616485493416	0.999400262816908	NA	NA	NA
295	Q0160_09	48.2016084967524	-0.274635962271985	0.98905648491146	-0.277674699536063	0.781262083951196	0.999400262816908	NA	NA	NA
296	Q0182_01	81.8255588143082	-0.349446041288815	0.850737726658347	-0.410756488561311	0.681251101383382	0.999400262816908	NA	NA	NA
297	Q0182_02	233.805507513094	0.0855362562610252	0.577277493370625	0.148171819000934	0.882207171475587	0.999400262816908	NA	NA	NA
298	Q0182_03	318.218117276742	0.328821424647737	0.481094374576515	0.683486322069724	0.494299590268713	0.999400262816908	NA	NA	NA
299	Q0182_04	259.095228312866	0.192437868125468	0.490595659620836	0.392253507245042	0.694870912351965	0.999400262816908	NA	NA	NA
300	Q0182_05	132.293462172306	1.26907695711417	0.753581496362898	1.68406066661571	0.09216994491212	0.985142525474078	NA	NA	NA
301	Q0182_07	532.558104088073	-0.077004082643987	0.374225799256887	-0.205769037829291	0.836971327858392	0.999400262816908	NA	NA	NA
302	Q0182_08	149.045205575529	-0.179371874249404	0.650902667233334	-0.275574034765943	0.782875254954391	0.999400262816908	NA	NA	NA
303	Q0250_01	159.896420369829	0.61726508893566	0.608492468667168	1.01441697427695	0.310383828112163	0.999400262816908	NA	NA	NA
304	Q0250_02	170.738274364829	-0.356083140312109	0.6563916777001	-0.542485763317068	0.58748391234635	0.999400262816908	NA	NA	NA
305	Q0250_03	193.770178108555	0.637035496397723	0.746998066244007	0.852794036804956	0.393773531406511	0.999400262816908	NA	NA	NA
306	Q0250_04	122.680441159423	0.177192722288678	0.755253753532462	0.234613494418154	0.81450873483249	0.999400262816908	NA	NA	NA
307	Q0250_09	117.314719569905	0.359106460442931	0.777192261162195	0.462056145420094	0.64404105801807	0.999400262816908	NA	NA	NA
308	Q0255_03	171.423685774451	-0.222748558440718	0.541280132516515	-0.411521770446511	0.680689981163354	0.999400262816908	NA	NA	NA
309	Q0255_05	286.215990021622	-0.135349658625585	0.461229631011556	-0.293453953356683	0.769175190802528	0.999400262816908	NA	NA	NA
310	Q0255_07	93.038359224681	-0.4917545934435	0.87090634855944	-0.564646927028271	0.572313939852785	0.999400262816908	NA	NA	NA
311	Q0255_08	200.510784834187	-0.634822973386454	0.581777172354561	-1.09117889726956	0.275194171640079	0.999400262816908	NA	NA	NA
312	Q0275_01	308.436686191192	0.0241441509649173	0.427199251970631	0.0565173062769717	0.954929709144624	0.999400262816908	NA	NA	NA
313	Q0275_03	245.162457138483	0.0263450158113054	0.490974117827566	0.0536586652018955	0.957207115718925	0.999400262816908	NA	NA	NA
314	Q0297_00	189.937694740054	0.39452053216392	0.612128260668694	0.644506319203336	0.519247161222483	0.999400262816908	NA	NA	NA
315	RUF20_02	246.582851408805	-0.137350469064203	0.602199384107111	-0.228081384154609	0.819582971997462	0.999400262816908	RUF20	RUF20	RNA of Unknown Function
316	RUF23_01	75.4517574930085	-0.0556887547603163	0.969241659366937	-0.057456006169493	0.954181950172616	0.999400262816908	NA	NA	NA
317	RUF5-1_03	61.6523390423631	-0.653730229349401	0.891257739004282	-0.733491784407675	0.463258536828519	0.999400262816908	NA	NA	NA
318	RUF5-1_06	233.475556852877	0.182893888046615	0.558299712791631	0.327590868947616	0.743221026829746	0.999400262816908	RUF5-1	RUF5-1	RNA of Unknown Function
319	RUF5-1_08	147.242928666282	-0.317511024872301	0.684775521710654	-0.463671692117613	0.642882981482287	0.999400262816908	RUF5-1	RUF5-1	RNA of Unknown Function
320	RUF5-1_09	325.503065494039	0.38195880406406	0.470886856976511	0.811147727750476	0.41728083989898	0.999400262816908	RUF5-1	RUF5-1	RNA of Unknown Function
321	snR10_00	162.318498411542	-0.151703432714759	0.585567042777698	-0.259070988686689	0.795580468472873	0.999400262816908	NA	NA	NA
322	snR10_01	122.679618573779	-0.00883895758537819	0.744953970758611	-0.0118651056740824	0.990533237493837	0.999761532217726	NA	NA	NA
323	snR10_08	70.6112607394945	0.68197942280989	0.928770980398704	0.734281579854195	0.462777141997578	0.999400262816908	snR10	SNR10	H/ACA box small nucleolar RNA (snoRNA); essential gene required for for preRNA processing, specifically for cleavage at sites A1 and A2; also guides pseudouridylation of large subunit (LSU) rRNA at position U2923
324	snR18_00	346.339165832363	-0.428978959554772	0.433468087073133	-0.989643695459399	0.322348304520811	0.999400262816908	NA	NA	NA
325	snR18_01	127.362550448702	-0.115831218832633	0.681481729961737	-0.169969661313058	0.865033996208617	0.999400262816908	NA	NA	NA
326	snR35_02	140.622991936593	-0.380634743113741	0.602370741627608	-0.631894474298775	0.527455834320789	0.999400262816908	NA	NA	NA
327	snR42_02	46.8873062143211	-2.845046691815	1.03826320909877	-2.74019792561518	0.00614021956209824	0.401720520838172	NA	NA	NA
328	snR42_03	56.534090167758	-0.644054210640449	0.925420348261739	-0.695958557481696	0.486454783662325	0.999400262816908	snR42	SNR42	H/ACA box small nucleolar RNA (snoRNA); guides pseudouridylation of large subunit (LSU) rRNA at position U2975
329	snR43_03	334.969012127265	0.00791078308804924	0.420925893805471	0.0187937667994955	0.985005626319517	0.999761532217726	snR43	SNR43	H/ACA box small nucleolar RNA (snoRNA); guides pseudouridylation of large subunit (LSU) rRNA at position U966 and of 5.8S rRNA at position 73
330	snR45_01	398.729364856285	0.466205811496929	0.399617776924511	1.16662931034972	0.243360101331476	0.999400262816908	NA	NA	NA
331	snR45_02	83.6261664066121	-0.654750101716066	0.787004207152188	-0.831952479752694	0.405435767844468	0.999400262816908	snR45	SNR45	C/D box small nucleolar RNA (snoRNA) but not shown to be active; no target site is predicted within the ribosomal RNAs
332	snR45_07	359.318688697228	0.422141321678542	0.406790241683721	1.03773709008181	0.299392472245177	0.999400262816908	NA	NA	NA
333	snR45_08	158.234665533695	1.13400514776777	0.619759568115351	1.8297501258693	0.0672873116925977	0.937850055001832	NA	NA	NA
334	snR45_09	109.945730600057	-0.679500100001769	0.678487910527485	-1.00149183125974	0.316589087401641	0.999400262816908	snR45	SNR45	C/D box small nucleolar RNA (snoRNA) but not shown to be active; no target site is predicted within the ribosomal RNAs
335	snR5_00	72.9874291047506	-1.82127784735445	0.923556571234458	-1.97202629928783	0.0486066043568857	0.886349369217783	snR5	SNR5	H/ACA box small nucleolar RNA (snoRNA); guides pseudouridylation of large subunit (LSU) rRNA at positions U1004 and U1124
336	snR5_04	107.650679678035	0.228652117733464	0.741023558100828	0.308562548698826	0.757654313303482	0.999400262816908	snR5	SNR5	H/ACA box small nucleolar RNA (snoRNA); guides pseudouridylation of large subunit (LSU) rRNA at positions U1004 and U1124
337	snR5_05	172.407703149423	-0.00540241977243969	0.636893529752185	-0.00848245353433213	0.993232062448453	0.999761532217726	snR5	SNR5	H/ACA box small nucleolar RNA (snoRNA); guides pseudouridylation of large subunit (LSU) rRNA at positions U1004 and U1124
338	snR5_08	133.796718682765	0.119936382188526	0.797606692694774	0.150370330749498	0.880472447728612	0.999400262816908	snR5	SNR5	H/ACA box small nucleolar RNA (snoRNA); guides pseudouridylation of large subunit (LSU) rRNA at positions U1004 and U1124
339	snR50_00	156.556879061199	0.0395161968352302	0.607165984360734	0.0650830215346065	0.948107898621686	0.999400262816908	snR50	SNR50	C/D box small nucleolar RNA (snoRNA); guides 2'-O-methylation of large subunit (LSU) rRNA at position G867
340	snR50_07	283.593836235566	0.0785102196202547	0.495963580667288	0.158298356332181	0.874221703270581	0.999400262816908	snR50	SNR50	C/D box small nucleolar RNA (snoRNA); guides 2'-O-methylation of large subunit (LSU) rRNA at position G867
341	snR56_00	160.653495893892	0.197570040979646	0.566220889599025	0.348927502691674	0.727143737104542	0.999400262816908	NA	NA	NA
342	snR60_02	113.711967994699	-1.35409853636658	0.980709875344007	-1.38073304899841	0.167361055698482	0.999400262816908	snR60	SNR60	C/D box small nucleolar RNA (snoRNA); guides 2'-O-methylation of large subunit (LSU) rRNA at positions A817 and G908
343	snR62_02	378.486379329043	-0.82625789990196	0.468306687869575	-1.76435212501615	0.0776727131606329	0.962161681264777	snR62	SNR62	C/D box small nucleolar RNA (snoRNA); guides 2'-O-methylation of large subunit (LSU) rRNA at position U1888
344	snR62_04	37.1753694227542	0.778244601151836	1.06579454088027	0.730201339283516	0.465267124038909	0.999400262816908	snR62	SNR62	C/D box small nucleolar RNA (snoRNA); guides 2'-O-methylation of large subunit (LSU) rRNA at position U1888
345	snR62_05	128.605354902813	0.415577195747165	0.66634791480833	0.623663984701899	0.53284828017838	0.999400262816908	snR62	SNR62	C/D box small nucleolar RNA (snoRNA); guides 2'-O-methylation of large subunit (LSU) rRNA at position U1888
346	snR62_07	124.510885067515	0.198473545312715	0.644036284681821	0.308171371758609	0.757951935099817	0.999400262816908	snR62	SNR62	C/D box small nucleolar RNA (snoRNA); guides 2'-O-methylation of large subunit (LSU) rRNA at position U1888
347	snR68_08	204.519674120934	-1.34641713942854	0.591053851430714	-2.27799402062838	0.022726933852604	0.719718640909665	snR68	SNR68	C/D box small nucleolar RNA (snoRNA); guides 2'-O-methylation of large subunit (LSU) rRNA at position A2640
348	snR68_09	40.4308807222522	0.182207038027059	1.12180818940965	0.162422631379563	0.870973050198419	0.999400262816908	snR68	SNR68	C/D box small nucleolar RNA (snoRNA); guides 2'-O-methylation of large subunit (LSU) rRNA at position A2640
349	snR7-L_02	304.827198741713	0.0645790900623346	0.542975640512809	0.118935519835371	0.90532644071665	0.999400262816908	NA	NA	NA
350	snR7-L_03	208.143570892203	-0.107669956436496	0.514464262442601	-0.209285589489336	0.834225300614088	0.999400262816908	NA	NA	NA
351	snR77_01	96.382609779925	0.833350746877243	0.776931884768218	1.07261751411561	0.283442763309405	0.999400262816908	snR77	SNR77	C/D box small nucleolar RNA (snoRNA); guides 2'-O-methylation of small subunit (SSU) rRNA at position U578
352	snR77_02	82.8828077523898	0.374624220314769	0.757324908968163	0.494667765286085	0.620834659077793	0.999400262816908	snR77	SNR77	C/D box small nucleolar RNA (snoRNA); guides 2'-O-methylation of small subunit (SSU) rRNA at position U578
353	snR77_04	259.245674478182	-0.0658510019655475	0.506851738840092	-0.129921625831342	0.896628434363683	0.999400262816908	snR77	SNR77	C/D box small nucleolar RNA (snoRNA); guides 2'-O-methylation of small subunit (SSU) rRNA at position U578
354	snR77_05	92.5512739876395	0.516905803621928	1.01049120762068	0.51153914029499	0.608973588629845	0.999400262816908	snR77	SNR77	C/D box small nucleolar RNA (snoRNA); guides 2'-O-methylation of small subunit (SSU) rRNA at position U578
355	snR77_09	58.9894908801283	-0.14602746245616	0.933318548296594	-0.156460473996446	0.875670072673977	0.999400262816908	snR77	SNR77	C/D box small nucleolar RNA (snoRNA); guides 2'-O-methylation of small subunit (SSU) rRNA at position U578
356	snR80_01	256.255417314775	-0.0522405788608715	0.481978752485174	-0.108387721640237	0.913688140466805	0.999400262816908	snR80	SNR80	H/ACA box small nucleolar RNA (snoRNA); guides pseudouridylation of large subunit (LSU) rRNA at position U776 and small subunit (SSU) rRNA at position U759
357	snR80_05	102.192561585383	-0.42783003361802	0.81316832010289	-0.526127276532227	0.598799778032323	0.999400262816908	snR80	SNR80	H/ACA box small nucleolar RNA (snoRNA); guides pseudouridylation of large subunit (LSU) rRNA at position U776 and small subunit (SSU) rRNA at position U759
358	snR85_00	310.969276786823	-0.142853957159688	0.57657741335511	-0.247761972374914	0.80431857931602	0.999400262816908	NA	NA	NA
359	SRG1_03	429.81665140097	-0.423001900280089	0.403216546084795	-1.04906880530427	0.294146452121235	0.999400262816908	SRG1	SRG1	Non-protein-coding RNA that regulates the transcription of SER3; expression of SRG1 RNA represses expression of its neighboring gene SER3 via a transcription-interference mechanism
360	YAL001C_00	56.7157781500676	0.972757627472825	0.944076398158923	1.03038019949427	0.302831564413871	0.999400262816908	YAL001C	TFC3	Subunit of RNA polymerase III transcription initiation factor complex; part of the TauB domain of TFIIIC that binds DNA at the BoxB promoter sites of tRNA and similar genes; cooperates with Tfc6p in DNA binding; largest of six subunits of the RNA polymerase III transcription initiation factor complex (TFIIIC)
361	YAL001C_02	102.484088013077	-0.0233184397938313	0.732444250263682	-0.0318364705374322	0.974602462085229	0.999729202745466	YAL001C	TFC3	Subunit of RNA polymerase III transcription initiation factor complex; part of the TauB domain of TFIIIC that binds DNA at the BoxB promoter sites of tRNA and similar genes; cooperates with Tfc6p in DNA binding; largest of six subunits of the RNA polymerase III transcription initiation factor complex (TFIIIC)
362	YAL001C_03	222.394513415903	0.545666291363768	0.547975348359252	0.99578620278741	0.319354035432427	0.999400262816908	YAL001C	TFC3	Subunit of RNA polymerase III transcription initiation factor complex; part of the TauB domain of TFIIIC that binds DNA at the BoxB promoter sites of tRNA and similar genes; cooperates with Tfc6p in DNA binding; largest of six subunits of the RNA polymerase III transcription initiation factor complex (TFIIIC)
363	YAL001C_04	134.066007711847	0.0661015870369299	0.739671744910778	0.0893661106994202	0.928790955423072	0.999400262816908	YAL001C	TFC3	Subunit of RNA polymerase III transcription initiation factor complex; part of the TauB domain of TFIIIC that binds DNA at the BoxB promoter sites of tRNA and similar genes; cooperates with Tfc6p in DNA binding; largest of six subunits of the RNA polymerase III transcription initiation factor complex (TFIIIC)
364	YAL001C_05	240.322796418038	0.609348972254006	0.524761856666286	1.16119143286268	0.245564057986752	0.999400262816908	YAL001C	TFC3	Subunit of RNA polymerase III transcription initiation factor complex; part of the TauB domain of TFIIIC that binds DNA at the BoxB promoter sites of tRNA and similar genes; cooperates with Tfc6p in DNA binding; largest of six subunits of the RNA polymerase III transcription initiation factor complex (TFIIIC)
365	YAL001C_06	100.500555577741	-0.062177324810714	0.806506014680947	-0.0770946820964643	0.938548223483486	0.999400262816908	YAL001C	TFC3	Subunit of RNA polymerase III transcription initiation factor complex; part of the TauB domain of TFIIIC that binds DNA at the BoxB promoter sites of tRNA and similar genes; cooperates with Tfc6p in DNA binding; largest of six subunits of the RNA polymerase III transcription initiation factor complex (TFIIIC)
366	YAL001C_08	142.822523429752	-0.589885459483453	0.598142312275159	-0.986195838979691	0.324037020779344	0.999400262816908	YAL001C	TFC3	Subunit of RNA polymerase III transcription initiation factor complex; part of the TauB domain of TFIIIC that binds DNA at the BoxB promoter sites of tRNA and similar genes; cooperates with Tfc6p in DNA binding; largest of six subunits of the RNA polymerase III transcription initiation factor complex (TFIIIC)
367	YAL001C_09	107.204709824054	0.477096567342257	0.749680804562679	0.636399604256332	0.524515998765831	0.999400262816908	YAL001C	TFC3	Subunit of RNA polymerase III transcription initiation factor complex; part of the TauB domain of TFIIIC that binds DNA at the BoxB promoter sites of tRNA and similar genes; cooperates with Tfc6p in DNA binding; largest of six subunits of the RNA polymerase III transcription initiation factor complex (TFIIIC)
368	YAL002W_03	44.8379427715469	-1.22112746889434	1.0339959157165	-1.18097900613869	0.237611063365816	0.999400262816908	YAL002W	VPS8	Membrane-binding component of the CORVET complex; involved in endosomal vesicle tethering and fusion in the endosome to vacuole protein targeting pathway; interacts with Vps21p; contains RING finger motif
369	YAL002W_05	94.495731800086	0.404334087229485	0.69409545970776	0.582533831008958	0.560207160595986	0.999400262816908	YAL002W	VPS8	Membrane-binding component of the CORVET complex; involved in endosomal vesicle tethering and fusion in the endosome to vacuole protein targeting pathway; interacts with Vps21p; contains RING finger motif
370	YAL002W_08	257.475869182806	-0.0681757820498308	0.465708766052711	-0.146391451094383	0.883612375647279	0.999400262816908	YAL002W	VPS8	Membrane-binding component of the CORVET complex; involved in endosomal vesicle tethering and fusion in the endosome to vacuole protein targeting pathway; interacts with Vps21p; contains RING finger motif
371	YAL003W_00	157.517386303272	0.308535930388797	0.620284808484765	0.497410102856606	0.618899882640219	0.999400262816908	YAL003W	EFB1	Translation elongation factor 1 beta; stimulates nucleotide exchange to regenerate EF-1 alpha-GTP for the next elongation cycle; part of the EF-1 complex, which facilitates binding of aminoacyl-tRNA to the ribosomal A site; human homolog EEF1B2 can complement yeast efb1 mutants
372	YAL003W_03	128.3665546165	-0.803290891510638	0.831095252171136	-0.966544916978093	0.333771582304313	0.999400262816908	YAL003W	EFB1	Translation elongation factor 1 beta; stimulates nucleotide exchange to regenerate EF-1 alpha-GTP for the next elongation cycle; part of the EF-1 complex, which facilitates binding of aminoacyl-tRNA to the ribosomal A site; human homolog EEF1B2 can complement yeast efb1 mutants
373	YAL003W_04	174.61288039085	-0.411042805651174	0.654934121226882	-0.627609392042625	0.530259854554595	0.999400262816908	YAL003W	EFB1	Translation elongation factor 1 beta; stimulates nucleotide exchange to regenerate EF-1 alpha-GTP for the next elongation cycle; part of the EF-1 complex, which facilitates binding of aminoacyl-tRNA to the ribosomal A site; human homolog EEF1B2 can complement yeast efb1 mutants
374	YAL003W_06	93.3048181735425	0.536718184209378	0.796964356178538	0.673453185262831	0.500659022337397	0.999400262816908	YAL003W	EFB1	Translation elongation factor 1 beta; stimulates nucleotide exchange to regenerate EF-1 alpha-GTP for the next elongation cycle; part of the EF-1 complex, which facilitates binding of aminoacyl-tRNA to the ribosomal A site; human homolog EEF1B2 can complement yeast efb1 mutants
375	YAL003W_07	182.579658524249	-1.09968775106265	0.588425309270844	-1.86886548511203	0.0616415313152242	0.924335709075758	YAL003W	EFB1	Translation elongation factor 1 beta; stimulates nucleotide exchange to regenerate EF-1 alpha-GTP for the next elongation cycle; part of the EF-1 complex, which facilitates binding of aminoacyl-tRNA to the ribosomal A site; human homolog EEF1B2 can complement yeast efb1 mutants
376	YAL004W_00	372.495755608559	0.217658944783567	0.415615922716481	0.523702131912898	0.600485732589056	0.999400262816908	NA	NA	NA
377	YAL004W_01	289.295272130339	-0.064200251826692	0.494925751076001	-0.129716935696145	0.896790383032004	0.999400262816908	NA	NA	NA
378	YAL004W_02	805.315393320894	0.96765639152816	0.323250442945033	2.99351915100919	0.00275780200417818	0.255874261139539	NA	NA	NA
379	YAL004W_03	268.576657782396	-0.810064310453218	0.480993669115006	-1.68414755217814	0.092153156360538	0.985142525474078	NA	NA	NA
380	YAL004W_06	164.706714542428	0.751219217594994	0.713299883290543	1.05316043811689	0.292267466895476	0.999400262816908	NA	NA	NA
381	YAL004W_07	113.443281532138	0.958850950469929	0.734038872739058	1.30626726469129	0.191461685234218	0.999400262816908	NA	NA	NA
382	YAL004W_08	90.5788114232156	0.638619396266815	0.795053643966535	0.803240638053972	0.421835661216381	0.999400262816908	NA	NA	NA
383	YAL004W_09	107.5045099495	0.37966505284624	0.726330030965249	0.522716997315515	0.601171208099087	0.999400262816908	NA	NA	NA
384	YAL005C_01	104.172729786211	-0.759963644871683	0.766943062986961	-0.990899691969185	0.321734562793198	0.999400262816908	YAL005C	SSA1	ATPase involved in protein folding and NLS-directed nuclear transport; member of HSP70 family; required for ubiquitin-dependent degradation of short-lived proteins; forms chaperone complex with Ydj1p; localized to nucleus, cytoplasm, cell wall; 98% identical to paralog Ssa2p with different functional specificity in propagation of yeast [URE3] prions, vacuolar-mediated degradations of gluconeogene…
385	YAL005C_04	350.346706547171	0.218313922889032	0.438951336605578	0.497353361712619	0.618939888020198	0.999400262816908	YAL005C	SSA1	ATPase involved in protein folding and NLS-directed nuclear transport; member of HSP70 family; required for ubiquitin-dependent degradation of short-lived proteins; forms chaperone complex with Ydj1p; localized to nucleus, cytoplasm, cell wall; 98% identical to paralog Ssa2p with different functional specificity in propagation of yeast [URE3] prions, vacuolar-mediated degradations of gluconeogene…
386	YAL005C_05	221.583620936564	0.801329007610991	0.684860376520077	1.17006186236488	0.241976074651774	0.999400262816908	YAL005C	SSA1	ATPase involved in protein folding and NLS-directed nuclear transport; member of HSP70 family; required for ubiquitin-dependent degradation of short-lived proteins; forms chaperone complex with Ydj1p; localized to nucleus, cytoplasm, cell wall; 98% identical to paralog Ssa2p with different functional specificity in propagation of yeast [URE3] prions, vacuolar-mediated degradations of gluconeogene…
387	YAL005C_08	101.678990873042	1.52935894697504	0.801985428023526	1.90696600403839	0.0565249899296489	0.917761511186471	YAL005C	SSA1	ATPase involved in protein folding and NLS-directed nuclear transport; member of HSP70 family; required for ubiquitin-dependent degradation of short-lived proteins; forms chaperone complex with Ydj1p; localized to nucleus, cytoplasm, cell wall; 98% identical to paralog Ssa2p with different functional specificity in propagation of yeast [URE3] prions, vacuolar-mediated degradations of gluconeogene…
388	YAL007C_03	51.8498639241686	-0.262299376533431	1.03486893992585	-0.253461444646532	0.799911651301965	0.999400262816908	YAL007C	ERP2	Member of the p24 family involved in ER to Golgi transport; similar to Emp24p and Erv25p; role in misfolded protein quality control; forms a heterotrimeric complex with Erp1p, Emp24p, and Erv25p; localized to COPII-coated vesicles; ERP2 has a paralog, ERP4, that arose from the whole genome duplication
389	YAL007C_04	61.0196345453771	-1.31509252921095	0.966344247087652	-1.3608944567884	0.173547045546376	0.999400262816908	YAL007C	ERP2	Member of the p24 family involved in ER to Golgi transport; similar to Emp24p and Erv25p; role in misfolded protein quality control; forms a heterotrimeric complex with Erp1p, Emp24p, and Erv25p; localized to COPII-coated vesicles; ERP2 has a paralog, ERP4, that arose from the whole genome duplication
390	YAL007C_07	218.655478025507	-0.432737137798678	0.609499827466397	-0.709987301551018	0.477712010784888	0.999400262816908	YAL007C	ERP2	Member of the p24 family involved in ER to Golgi transport; similar to Emp24p and Erv25p; role in misfolded protein quality control; forms a heterotrimeric complex with Erp1p, Emp24p, and Erv25p; localized to COPII-coated vesicles; ERP2 has a paralog, ERP4, that arose from the whole genome duplication
391	YAL007C_08	189.560178788074	-1.14109226419338	0.58781664543702	-1.94123843387426	0.0522293632889065	0.896770821452921	YAL007C	ERP2	Member of the p24 family involved in ER to Golgi transport; similar to Emp24p and Erv25p; role in misfolded protein quality control; forms a heterotrimeric complex with Erp1p, Emp24p, and Erv25p; localized to COPII-coated vesicles; ERP2 has a paralog, ERP4, that arose from the whole genome duplication
392	YAL008W_03	235.031649168279	0.397478758947598	0.466725343649913	0.85163311646891	0.394417753160004	0.999400262816908	YAL008W	FUN14	Integral mitochondrial outer membrane (MOM) protein; dosage suppressor of an MDM10 null that reduces ERMES-related phenotypes, such as alterations in mitochondrial morphology, protein complex assembly, and lipid profile; dosage suppressor of MDM12, MDM34, and MMM1 null mutant growth defects; novel mechanism of MOM import involving Tom70p, the TOM complex, and the TIM23 complex, requiring mitochon…
393	YAL008W_04	336.727637125595	0.144798148967014	0.42427889767137	0.341280581621499	0.732892364965407	0.999400262816908	YAL008W	FUN14	Integral mitochondrial outer membrane (MOM) protein; dosage suppressor of an MDM10 null that reduces ERMES-related phenotypes, such as alterations in mitochondrial morphology, protein complex assembly, and lipid profile; dosage suppressor of MDM12, MDM34, and MMM1 null mutant growth defects; novel mechanism of MOM import involving Tom70p, the TOM complex, and the TIM23 complex, requiring mitochon…
394	YAL008W_05	113.977643474719	0.582889444517922	0.678692151043869	0.858842177003821	0.390427594509651	0.999400262816908	YAL008W	FUN14	Integral mitochondrial outer membrane (MOM) protein; dosage suppressor of an MDM10 null that reduces ERMES-related phenotypes, such as alterations in mitochondrial morphology, protein complex assembly, and lipid profile; dosage suppressor of MDM12, MDM34, and MMM1 null mutant growth defects; novel mechanism of MOM import involving Tom70p, the TOM complex, and the TIM23 complex, requiring mitochon…
395	YAL008W_06	179.181941813579	-0.310605034731337	0.556826450305425	-0.557813003604564	0.576972082177064	0.999400262816908	YAL008W	FUN14	Integral mitochondrial outer membrane (MOM) protein; dosage suppressor of an MDM10 null that reduces ERMES-related phenotypes, such as alterations in mitochondrial morphology, protein complex assembly, and lipid profile; dosage suppressor of MDM12, MDM34, and MMM1 null mutant growth defects; novel mechanism of MOM import involving Tom70p, the TOM complex, and the TIM23 complex, requiring mitochon…
396	YAL008W_08	98.133106049887	-0.081246911740779	0.72294915931977	-0.112382607674964	0.910520045025917	0.999400262816908	YAL008W	FUN14	Integral mitochondrial outer membrane (MOM) protein; dosage suppressor of an MDM10 null that reduces ERMES-related phenotypes, such as alterations in mitochondrial morphology, protein complex assembly, and lipid profile; dosage suppressor of MDM12, MDM34, and MMM1 null mutant growth defects; novel mechanism of MOM import involving Tom70p, the TOM complex, and the TIM23 complex, requiring mitochon…
397	YAL009W_00	363.967893554148	0.406614573456246	0.437385266168855	0.929648538502142	0.352553087319238	0.999400262816908	YAL009W	SPO7	Putative regulatory subunit of Nem1p-Spo7p phosphatase holoenzyme; regulates nuclear growth by controlling phospholipid biosynthesis, required for normal nuclear envelope morphology, premeiotic replication, and sporulation
398	YAL009W_01	98.9953944699825	-0.863973395597918	0.730193601749708	-1.18321140246593	0.236725375079355	0.999400262816908	NA	NA	NA
399	YAL009W_02	141.15420703991	0.339595972897911	0.614606086438041	0.552542482724252	0.580576736507007	0.999400262816908	YAL009W	SPO7	Putative regulatory subunit of Nem1p-Spo7p phosphatase holoenzyme; regulates nuclear growth by controlling phospholipid biosynthesis, required for normal nuclear envelope morphology, premeiotic replication, and sporulation
400	YAL009W_03	220.681364372446	-0.675406639775043	0.689874779750585	-0.979027875202551	0.327566206481115	0.999400262816908	YAL009W	SPO7	Putative regulatory subunit of Nem1p-Spo7p phosphatase holoenzyme; regulates nuclear growth by controlling phospholipid biosynthesis, required for normal nuclear envelope morphology, premeiotic replication, and sporulation
401	YAL009W_05	212.383336329408	0.852729427301277	0.496685758592803	1.71683889169121	0.0860086127259168	0.975530227151113	YAL009W	SPO7	Putative regulatory subunit of Nem1p-Spo7p phosphatase holoenzyme; regulates nuclear growth by controlling phospholipid biosynthesis, required for normal nuclear envelope morphology, premeiotic replication, and sporulation
402	YAL009W_09	285.043196716185	0.109054479962026	0.464724046743735	0.234665024816679	0.814468735900547	0.999400262816908	YAL009W	SPO7	Putative regulatory subunit of Nem1p-Spo7p phosphatase holoenzyme; regulates nuclear growth by controlling phospholipid biosynthesis, required for normal nuclear envelope morphology, premeiotic replication, and sporulation
403	YAL010C_02	243.023786252175	0.0389685037829284	0.474029636581734	0.0822068933578362	0.934482191895016	0.999400262816908	YAL010C	MDM10	Subunit of both the ERMES and the SAM complex; component of ERMES complex which acts as a molecular tether between the mitochondria and the ER, necessary for efficient phospholipid exchange between organelles and for mitophagy; SAM/TOB complex component that functions in the assembly of outer membrane beta-barrel proteins; involved in mitochondrial inheritance and morphology; ERMES complex is oft…
404	YAL010C_04	265.901180032321	0.845531711944696	0.481719518865894	1.75523656158945	0.0792188524785153	0.962161681264777	YAL010C	MDM10	Subunit of both the ERMES and the SAM complex; component of ERMES complex which acts as a molecular tether between the mitochondria and the ER, necessary for efficient phospholipid exchange between organelles and for mitophagy; SAM/TOB complex component that functions in the assembly of outer membrane beta-barrel proteins; involved in mitochondrial inheritance and morphology; ERMES complex is oft…
405	YAL010C_06	138.746222259446	-0.800505553433956	0.617143558543675	-1.2971140058935	0.19459196312957	0.999400262816908	YAL010C	MDM10	Subunit of both the ERMES and the SAM complex; component of ERMES complex which acts as a molecular tether between the mitochondria and the ER, necessary for efficient phospholipid exchange between organelles and for mitophagy; SAM/TOB complex component that functions in the assembly of outer membrane beta-barrel proteins; involved in mitochondrial inheritance and morphology; ERMES complex is oft…
406	YAL010C_07	180.525209624939	0.52496388984492	0.582044892233869	0.901930240861879	0.367093925819427	0.999400262816908	YAL009W	SPO7	Putative regulatory subunit of Nem1p-Spo7p phosphatase holoenzyme; regulates nuclear growth by controlling phospholipid biosynthesis, required for normal nuclear envelope morphology, premeiotic replication, and sporulation
407	YAL010C_09	459.713344366539	-0.735091497586281	0.447613042712684	-1.64224771720543	0.100538677384308	0.999400262816908	YAL009W	SPO7	Putative regulatory subunit of Nem1p-Spo7p phosphatase holoenzyme; regulates nuclear growth by controlling phospholipid biosynthesis, required for normal nuclear envelope morphology, premeiotic replication, and sporulation
408	YAL011W_01	108.054994060438	0.15371271887182	0.697657718631373	0.220326837597906	0.825616620280962	0.999400262816908	YAL011W	SWC3	Protein of unknown function; component of the SWR1 complex, which exchanges histone variant H2AZ (Htz1p) for chromatin-bound histone H2A; required for formation of nuclear-associated array of smooth endoplasmic reticulum known as karmellae
409	YAL011W_04	241.422079787987	1.15424720936515	0.488215404856281	2.36421710147579	0.018068220904123	0.661723437884928	YAL011W	SWC3	Protein of unknown function; component of the SWR1 complex, which exchanges histone variant H2AZ (Htz1p) for chromatin-bound histone H2A; required for formation of nuclear-associated array of smooth endoplasmic reticulum known as karmellae
410	YAL011W_05	301.139815855883	-0.833564936454995	0.46169148691504	-1.80545875347359	0.0710029243387486	0.944130372238926	YAL011W	SWC3	Protein of unknown function; component of the SWR1 complex, which exchanges histone variant H2AZ (Htz1p) for chromatin-bound histone H2A; required for formation of nuclear-associated array of smooth endoplasmic reticulum known as karmellae
411	YAL011W_07	142.11963584297	-0.551808031863923	0.638806378757634	-0.863811086133943	0.387691676796273	0.999400262816908	YAL011W	SWC3	Protein of unknown function; component of the SWR1 complex, which exchanges histone variant H2AZ (Htz1p) for chromatin-bound histone H2A; required for formation of nuclear-associated array of smooth endoplasmic reticulum known as karmellae
412	YAL011W_08	206.775152844891	-0.296754784340916	0.516264380877749	-0.574811657229531	0.565418681974476	0.999400262816908	YAL011W	SWC3	Protein of unknown function; component of the SWR1 complex, which exchanges histone variant H2AZ (Htz1p) for chromatin-bound histone H2A; required for formation of nuclear-associated array of smooth endoplasmic reticulum known as karmellae
413	YAL011W_09	85.5620577967098	0.331697302987975	0.811924483401941	0.408532209298791	0.682882988630999	0.999400262816908	YAL011W	SWC3	Protein of unknown function; component of the SWR1 complex, which exchanges histone variant H2AZ (Htz1p) for chromatin-bound histone H2A; required for formation of nuclear-associated array of smooth endoplasmic reticulum known as karmellae
414	YAL012W_01	73.4446932487806	0.834761709537628	0.945543772416087	0.882837721414647	0.377323956464646	0.999400262816908	YAL012W	CYS3	Cystathionine gamma-lyase; catalyzes one of the two reactions involved in the transsulfuration pathway that yields cysteine from homocysteine with the intermediary formation of cystathionine; protein abundance increases in response to DNA replication stress
415	YAL012W_02	93.305327251668	-0.899023274572332	0.834980752216137	-1.07669939958043	0.281614580705356	0.999400262816908	YAL012W	CYS3	Cystathionine gamma-lyase; catalyzes one of the two reactions involved in the transsulfuration pathway that yields cysteine from homocysteine with the intermediary formation of cystathionine; protein abundance increases in response to DNA replication stress
416	YAL012W_03	185.622226855474	-0.733469313830349	0.533930425884199	-1.37371702055696	0.169529550739045	0.999400262816908	YAL012W	CYS3	Cystathionine gamma-lyase; catalyzes one of the two reactions involved in the transsulfuration pathway that yields cysteine from homocysteine with the intermediary formation of cystathionine; protein abundance increases in response to DNA replication stress
417	YAL012W_04	45.3332672425965	-0.880649177522612	1.00066032031301	-0.8800680507119	0.378822445685036	0.999400262816908	YAL012W	CYS3	Cystathionine gamma-lyase; catalyzes one of the two reactions involved in the transsulfuration pathway that yields cysteine from homocysteine with the intermediary formation of cystathionine; protein abundance increases in response to DNA replication stress
418	YAL012W_05	126.101586122684	-0.356258631307886	0.656227793361365	-0.542888665966186	0.587206460080504	0.999400262816908	YAL012W	CYS3	Cystathionine gamma-lyase; catalyzes one of the two reactions involved in the transsulfuration pathway that yields cysteine from homocysteine with the intermediary formation of cystathionine; protein abundance increases in response to DNA replication stress
419	YAL012W_07	488.518483914699	-0.371126277883216	0.451042202892186	-0.822819406927932	0.410610698829918	0.999400262816908	YAL012W	CYS3	Cystathionine gamma-lyase; catalyzes one of the two reactions involved in the transsulfuration pathway that yields cysteine from homocysteine with the intermediary formation of cystathionine; protein abundance increases in response to DNA replication stress
420	YAL013W_00	139.375950302689	-1.03686151407187	0.654080300797382	-1.58522051926628	0.112916240007506	0.999400262816908	YAL013W	DEP1	Component of the Rpd3L histone deacetylase complex; required for diauxic shift-induced histone H2B deposition onto rDNA genes; transcriptional modulator involved in regulation of structural phospholipid biosynthesis genes and metabolically unrelated genes, as well as maintenance of telomeres, mating efficiency, and sporulation
421	YAL013W_01	289.280982678232	-0.211683875192431	0.458796357051815	-0.461389616414334	0.644519099868376	0.999400262816908	NA	NA	NA
422	YAL013W_04	26.582551516995	1.39048419851341	1.21811103425754	1.14150858124435	0.253658343044121	0.999400262816908	YAL013W	DEP1	Component of the Rpd3L histone deacetylase complex; required for diauxic shift-induced histone H2B deposition onto rDNA genes; transcriptional modulator involved in regulation of structural phospholipid biosynthesis genes and metabolically unrelated genes, as well as maintenance of telomeres, mating efficiency, and sporulation
423	YAL013W_05	241.983452774398	-0.531263698476832	0.586380515876222	-0.906005032726865	0.3649331886492	0.999400262816908	YAL013W	DEP1	Component of the Rpd3L histone deacetylase complex; required for diauxic shift-induced histone H2B deposition onto rDNA genes; transcriptional modulator involved in regulation of structural phospholipid biosynthesis genes and metabolically unrelated genes, as well as maintenance of telomeres, mating efficiency, and sporulation
424	YAL013W_06	388.474351125417	-0.326392927641122	0.424628792128064	-0.768654725472985	0.44209830863475	0.999400262816908	NA	NA	NA
425	YAL013W_07	123.268916735952	-0.834779103590456	0.723756148679052	-1.1533982890702	0.248746943420918	0.999400262816908	YAL013W	DEP1	Component of the Rpd3L histone deacetylase complex; required for diauxic shift-induced histone H2B deposition onto rDNA genes; transcriptional modulator involved in regulation of structural phospholipid biosynthesis genes and metabolically unrelated genes, as well as maintenance of telomeres, mating efficiency, and sporulation
426	YAL013W_09	88.237603411429	0.29530139698019	0.760866243986327	0.388112101587066	0.697933076770389	0.999400262816908	YAL013W	DEP1	Component of the Rpd3L histone deacetylase complex; required for diauxic shift-induced histone H2B deposition onto rDNA genes; transcriptional modulator involved in regulation of structural phospholipid biosynthesis genes and metabolically unrelated genes, as well as maintenance of telomeres, mating efficiency, and sporulation
427	YAL014C_01	249.7309059275	-0.208770947209244	0.576155732050396	-0.362351592799883	0.717089308378708	0.999400262816908	YAL013W	DEP1	Component of the Rpd3L histone deacetylase complex; required for diauxic shift-induced histone H2B deposition onto rDNA genes; transcriptional modulator involved in regulation of structural phospholipid biosynthesis genes and metabolically unrelated genes, as well as maintenance of telomeres, mating efficiency, and sporulation
428	YAL015C_01	39.2616626912123	-0.521388453197982	1.11229571033677	-0.468749855234199	0.639248446522961	0.999400262816908	YAL015C	NTG1	DNA N-glycosylase and apurinic/apyrimidinic (AP) lyase; involved in base excision repair; acts in both nucleus and mitochondrion; creates a double-strand break at mtDNA origins that stimulates replication in response to oxidative stress; required for maintaining mitochondrial genome integrity; NTG1 has a paralog, NTG2, that arose from the whole genome duplication
429	YAL015C_02	232.411702097832	0.163474206115218	0.533247885470014	0.306563252418955	0.759175827903689	0.999400262816908	YAL015C	NTG1	DNA N-glycosylase and apurinic/apyrimidinic (AP) lyase; involved in base excision repair; acts in both nucleus and mitochondrion; creates a double-strand break at mtDNA origins that stimulates replication in response to oxidative stress; required for maintaining mitochondrial genome integrity; NTG1 has a paralog, NTG2, that arose from the whole genome duplication
430	YAL015C_03	533.429152294708	-0.153252216521061	0.406629724178118	-0.376883949718175	0.706259849697621	0.999400262816908	YAL015C	NTG1	DNA N-glycosylase and apurinic/apyrimidinic (AP) lyase; involved in base excision repair; acts in both nucleus and mitochondrion; creates a double-strand break at mtDNA origins that stimulates replication in response to oxidative stress; required for maintaining mitochondrial genome integrity; NTG1 has a paralog, NTG2, that arose from the whole genome duplication
431	YAL015C_05	322.067622682524	0.156360816308106	0.542005480852275	0.288485673728311	0.772974995305013	0.999400262816908	YAL015C	NTG1	DNA N-glycosylase and apurinic/apyrimidinic (AP) lyase; involved in base excision repair; acts in both nucleus and mitochondrion; creates a double-strand break at mtDNA origins that stimulates replication in response to oxidative stress; required for maintaining mitochondrial genome integrity; NTG1 has a paralog, NTG2, that arose from the whole genome duplication
432	YAL015C_06	85.5347199007493	-0.0253038663599738	0.755573808855275	-0.0334896022908869	0.973284157352294	0.999729202745466	YAL015C	NTG1	DNA N-glycosylase and apurinic/apyrimidinic (AP) lyase; involved in base excision repair; acts in both nucleus and mitochondrion; creates a double-strand break at mtDNA origins that stimulates replication in response to oxidative stress; required for maintaining mitochondrial genome integrity; NTG1 has a paralog, NTG2, that arose from the whole genome duplication
433	YAL015C_07	258.934162064816	-0.724950269912698	0.54303339304405	-1.33500127100635	0.181875930461197	0.999400262816908	YAL015C	NTG1	DNA N-glycosylase and apurinic/apyrimidinic (AP) lyase; involved in base excision repair; acts in both nucleus and mitochondrion; creates a double-strand break at mtDNA origins that stimulates replication in response to oxidative stress; required for maintaining mitochondrial genome integrity; NTG1 has a paralog, NTG2, that arose from the whole genome duplication
434	YAL015C_08	266.479774263865	-0.611265610066006	0.506667555753372	-1.20644316598703	0.22764666062224	0.999400262816908	YAL015C	NTG1	DNA N-glycosylase and apurinic/apyrimidinic (AP) lyase; involved in base excision repair; acts in both nucleus and mitochondrion; creates a double-strand break at mtDNA origins that stimulates replication in response to oxidative stress; required for maintaining mitochondrial genome integrity; NTG1 has a paralog, NTG2, that arose from the whole genome duplication
435	YAL016C-A_01	89.365176849372	-0.476931956202444	0.786241396998822	-0.606597360585376	0.544118152301174	0.999400262816908	NA	NA	NA
436	YAL016C-A_02	54.0189509124026	0.139431947060788	1.00682904924102	0.13848621785982	0.889856161218277	0.999400262816908	NA	NA	NA
437	YAL016C-A_03	66.0694468096761	0.521257798113609	0.883046256053035	0.590295009508882	0.554992884558644	0.999400262816908	NA	NA	NA
438	YAL016C-A_04	182.715023054824	-0.239374877992828	0.596362510319786	-0.401391559413198	0.688131862749265	0.999400262816908	NA	NA	NA
439	YAL016C-A_05	265.716754089831	0.552533811280917	0.562362082467409	0.98252323281938	0.325842143028267	0.999400262816908	NA	NA	NA
440	YAL016C-B_01	359.141286812469	-0.333503819406216	0.399458475990399	-0.834889830737329	0.403779740983697	0.999400262816908	NA	NA	NA
441	YAL016C-B_02	303.402365091657	-0.166089146609024	0.453068114124491	-0.366587586791391	0.713926668867237	0.999400262816908	NA	NA	NA
442	YAL016C-B_06	101.500520589942	-0.780327756585811	0.713860156714454	-1.09311011301888	0.274345456273559	0.999400262816908	NA	NA	NA
443	YAL016C-B_07	281.49122083407	-0.0135777244806178	0.422923527866254	-0.0321044434418688	0.974388759884208	0.999729202745466	NA	NA	NA
444	YAL016C-B_08	176.257610130523	-0.463262723554023	0.747341440440249	-0.619880951979755	0.535336167228013	0.999400262816908	NA	NA	NA
445	YAL016C-B_09	53.0199563588803	-0.65339275574042	0.946237716894213	-0.690516499263015	0.489869437796102	0.999400262816908	NA	NA	NA
446	YAL016W_01	154.99220791309	-0.270532409404505	0.649478415096164	-0.416537952788545	0.677016401505682	0.999400262816908	YAL016W	TPD3	Regulatory subunit A of the heterotrimeric PP2A complex; the heterotrimeric protein phosphatase 2A (PP2A) complex also contains regulatory subunit Cdc55p and either catalytic subunit Pph21p or Pph22p; required for cell morphogenesis and transcription by RNA polymerase III
447	YAL016W_06	50.8873357396833	1.30753487140859	1.10578960592254	1.18244453050156	0.237029362862932	0.999400262816908	YAL016W	TPD3	Regulatory subunit A of the heterotrimeric PP2A complex; the heterotrimeric protein phosphatase 2A (PP2A) complex also contains regulatory subunit Cdc55p and either catalytic subunit Pph21p or Pph22p; required for cell morphogenesis and transcription by RNA polymerase III
448	YAL016W_08	41.4871429914558	0.667539586111097	0.999747071543924	0.667708468583165	0.504319703214124	0.999400262816908	YAL016W	TPD3	Regulatory subunit A of the heterotrimeric PP2A complex; the heterotrimeric protein phosphatase 2A (PP2A) complex also contains regulatory subunit Cdc55p and either catalytic subunit Pph21p or Pph22p; required for cell morphogenesis and transcription by RNA polymerase III
449	YAL016W_09	173.782211950556	0.809936287185244	0.536503826235698	1.50965612466932	0.131131192219621	0.999400262816908	YAL016W	TPD3	Regulatory subunit A of the heterotrimeric PP2A complex; the heterotrimeric protein phosphatase 2A (PP2A) complex also contains regulatory subunit Cdc55p and either catalytic subunit Pph21p or Pph22p; required for cell morphogenesis and transcription by RNA polymerase III
450	YAL017W_00	368.293569903428	0.289207244022962	0.419646622542617	0.68916852534323	0.49071722121907	0.999400262816908	YAL017W	PSK1	PAS domain-containing serine/threonine protein kinase; coordinately regulates protein synthesis and carbohydrate metabolism and storage in response to a unknown metabolite that reflects nutritional status; PSK1 has a paralog, PSK2, that arose from the whole genome duplication
451	YAL017W_01	106.767608296201	0.406605109696097	0.74673073706511	0.544513690830761	0.586088029761836	0.999400262816908	YAL017W	PSK1	PAS domain-containing serine/threonine protein kinase; coordinately regulates protein synthesis and carbohydrate metabolism and storage in response to a unknown metabolite that reflects nutritional status; PSK1 has a paralog, PSK2, that arose from the whole genome duplication
452	YAL017W_02	392.578836479181	-0.506502573993447	0.39968734668411	-1.26724695739182	0.205067000185999	0.999400262816908	YAL017W	PSK1	PAS domain-containing serine/threonine protein kinase; coordinately regulates protein synthesis and carbohydrate metabolism and storage in response to a unknown metabolite that reflects nutritional status; PSK1 has a paralog, PSK2, that arose from the whole genome duplication
453	YAL017W_03	393.00085329123	-0.167672523229599	0.423881477999999	-0.395564637598059	0.692426228745548	0.999400262816908	YAL017W	PSK1	PAS domain-containing serine/threonine protein kinase; coordinately regulates protein synthesis and carbohydrate metabolism and storage in response to a unknown metabolite that reflects nutritional status; PSK1 has a paralog, PSK2, that arose from the whole genome duplication
454	YAL017W_07	403.760392868551	0.257092447557143	0.458413937923696	0.56083034630578	0.574913197201148	0.999400262816908	YAL017W	PSK1	PAS domain-containing serine/threonine protein kinase; coordinately regulates protein synthesis and carbohydrate metabolism and storage in response to a unknown metabolite that reflects nutritional status; PSK1 has a paralog, PSK2, that arose from the whole genome duplication
455	YAL018C_00	141.280674364671	0.677316651941488	0.780038897731108	0.868311380255001	0.385223893833871	0.999400262816908	YAL018C	LDS1	Protein Involved in spore wall assembly; localizes to lipid droplets found on or outside of the prospore membrane; shares similarity with Lds2p and Rrt8p, and a strain mutant for all 3 genes exhibits reduced dityrosine fluorescence relative to the single mutants
456	YAL018C_01	40.9395561121849	-1.20424639159411	1.154435769773	-1.04314715736061	0.296880142845708	0.999400262816908	YAL018C	LDS1	Protein Involved in spore wall assembly; localizes to lipid droplets found on or outside of the prospore membrane; shares similarity with Lds2p and Rrt8p, and a strain mutant for all 3 genes exhibits reduced dityrosine fluorescence relative to the single mutants
457	YAL018C_02	277.258869898214	-0.0819347606254973	0.51188095205659	-0.160066047185985	0.872829046698214	0.999400262816908	YAL018C	LDS1	Protein Involved in spore wall assembly; localizes to lipid droplets found on or outside of the prospore membrane; shares similarity with Lds2p and Rrt8p, and a strain mutant for all 3 genes exhibits reduced dityrosine fluorescence relative to the single mutants
458	YAL018C_03	144.337344455568	-0.493125963161164	0.679176604292661	-0.72606441394538	0.46779928331942	0.999400262816908	YAL018C	LDS1	Protein Involved in spore wall assembly; localizes to lipid droplets found on or outside of the prospore membrane; shares similarity with Lds2p and Rrt8p, and a strain mutant for all 3 genes exhibits reduced dityrosine fluorescence relative to the single mutants
459	YAL018C_04	126.425248656393	-0.0542068547361692	0.713697209032189	-0.0759521741855717	0.93945714770197	0.999400262816908	YAL018C	LDS1	Protein Involved in spore wall assembly; localizes to lipid droplets found on or outside of the prospore membrane; shares similarity with Lds2p and Rrt8p, and a strain mutant for all 3 genes exhibits reduced dityrosine fluorescence relative to the single mutants
460	YAL018C_08	80.7184007471551	0.794600781863697	0.732378095605002	1.08495978597953	0.27793946657813	0.999400262816908	YAL018C	LDS1	Protein Involved in spore wall assembly; localizes to lipid droplets found on or outside of the prospore membrane; shares similarity with Lds2p and Rrt8p, and a strain mutant for all 3 genes exhibits reduced dityrosine fluorescence relative to the single mutants
461	YAL018C_09	182.313262803871	0.11348323227	0.572394218130051	0.198260619474349	0.842841161171915	0.999400262816908	YAL018C	LDS1	Protein Involved in spore wall assembly; localizes to lipid droplets found on or outside of the prospore membrane; shares similarity with Lds2p and Rrt8p, and a strain mutant for all 3 genes exhibits reduced dityrosine fluorescence relative to the single mutants
462	YAL019W_00	117.854812714069	-0.319503325361202	0.804634236021054	-0.397078959678819	0.691309234967154	0.999400262816908	YAL019W	FUN30	Snf2p family member with ATP-dependent chromatin remodeling activity; has a role in silencing at the mating type locus, telomeres and centromeres; enriched at centromeres and is required for correct chromatin structure around centromeres, as well as at the boundary element of the silent HMR; recruited to DNA double-strand breaks (DSBs) where it promotes 5' strand resection of DSBs; potential Cdc2…
463	YAL019W_01	371.681803062494	-0.23178796413194	0.434486526900857	-0.533475608059143	0.59370439149833	0.999400262816908	NA	NA	NA
464	YAL019W_02	220.248391881183	0.00491771577495342	0.495048210913737	0.00993381183193559	0.992074095265121	0.999761532217726	YAL019W	FUN30	Snf2p family member with ATP-dependent chromatin remodeling activity; has a role in silencing at the mating type locus, telomeres and centromeres; enriched at centromeres and is required for correct chromatin structure around centromeres, as well as at the boundary element of the silent HMR; recruited to DNA double-strand breaks (DSBs) where it promotes 5' strand resection of DSBs; potential Cdc2…
465	YAL019W_03	243.54688966578	-0.0763567894844036	0.462471300219358	-0.165106006466101	0.868860545420156	0.999400262816908	YAL019W	FUN30	Snf2p family member with ATP-dependent chromatin remodeling activity; has a role in silencing at the mating type locus, telomeres and centromeres; enriched at centromeres and is required for correct chromatin structure around centromeres, as well as at the boundary element of the silent HMR; recruited to DNA double-strand breaks (DSBs) where it promotes 5' strand resection of DSBs; potential Cdc2…
466	YAL019W_04	133.496078312334	-1.80562565630985	0.746784748334014	-2.41786627316369	0.0156118130758464	0.629217652078278	YAL019W	FUN30	Snf2p family member with ATP-dependent chromatin remodeling activity; has a role in silencing at the mating type locus, telomeres and centromeres; enriched at centromeres and is required for correct chromatin structure around centromeres, as well as at the boundary element of the silent HMR; recruited to DNA double-strand breaks (DSBs) where it promotes 5' strand resection of DSBs; potential Cdc2…
467	YAL019W_05	103.861905093103	-1.02041505669502	0.874122630575315	-1.16735915648748	0.243065358084917	0.999400262816908	YAL019W	FUN30	Snf2p family member with ATP-dependent chromatin remodeling activity; has a role in silencing at the mating type locus, telomeres and centromeres; enriched at centromeres and is required for correct chromatin structure around centromeres, as well as at the boundary element of the silent HMR; recruited to DNA double-strand breaks (DSBs) where it promotes 5' strand resection of DSBs; potential Cdc2…
468	YAL019W_08	276.149744860401	0.110041548495086	0.480850782436201	0.228847602030649	0.818987367307792	0.999400262816908	YAL019W	FUN30	Snf2p family member with ATP-dependent chromatin remodeling activity; has a role in silencing at the mating type locus, telomeres and centromeres; enriched at centromeres and is required for correct chromatin structure around centromeres, as well as at the boundary element of the silent HMR; recruited to DNA double-strand breaks (DSBs) where it promotes 5' strand resection of DSBs; potential Cdc2…
469	YAL019W-A_03	247.662658246725	-0.131654706825002	0.597501543669013	-0.220342036300967	0.8256047842883	0.999400262816908	NA	NA	NA
470	YAL019W-A_04	105.679848889202	-1.17310563279066	0.733899233704195	-1.59845599902001	0.109941530451887	0.999400262816908	NA	NA	NA
471	YAL019W-A_05	213.213312983736	0.0787292140469923	0.536847826169068	0.146650894740139	0.883407579735313	0.999400262816908	NA	NA	NA
472	YAL019W-A_07	117.5985127488	-0.507850517158268	0.692389137015951	-0.733475570323063	0.463268422533574	0.999400262816908	NA	NA	NA
473	YAL019W-A_09	184.600164840202	0.855355290841569	0.545361481225751	1.5684189666624	0.116783387595558	0.999400262816908	NA	NA	NA
474	YAL020C_05	86.4149848818764	-0.820767736365107	0.84164875035127	-0.975190346355949	0.32946584980127	0.999400262816908	YAL020C	ATS1	Protein required for modification of wobble nucleosides in tRNA; acts with Elongator complex, Kti11p, and Kti12p; has a potential role in regulatory interactions between microtubules and the cell cycle; forms a stable heterodimer with Kti11p
475	YAL020C_09	143.934819539648	-0.00474047938134702	0.607094899793395	-0.00780846517234833	0.99376980950681	0.999761532217726	YAL020C	ATS1	Protein required for modification of wobble nucleosides in tRNA; acts with Elongator complex, Kti11p, and Kti12p; has a potential role in regulatory interactions between microtubules and the cell cycle; forms a stable heterodimer with Kti11p
476	YAL021C_01	593.014786129366	-0.429602140129091	0.439498914532215	-0.977481686357161	0.328330739953411	0.999400262816908	YAL021C	CCR4	Component of the CCR4-NOT transcriptional complex; CCR4-NOT is involved in regulation of gene expression; component of the major cytoplasmic deadenylase, which is involved in mRNA poly(A) tail shortening
477	YAL021C_02	285.110836133637	-0.45365078378523	0.631694048866328	-0.718149529189606	0.472665093780943	0.999400262816908	YAL021C	CCR4	Component of the CCR4-NOT transcriptional complex; CCR4-NOT is involved in regulation of gene expression; component of the major cytoplasmic deadenylase, which is involved in mRNA poly(A) tail shortening
478	YAL021C_03	60.13667401657	-0.560374707854939	0.916775453686894	-0.611245322506556	0.5410371828391	0.999400262816908	YAL021C	CCR4	Component of the CCR4-NOT transcriptional complex; CCR4-NOT is involved in regulation of gene expression; component of the major cytoplasmic deadenylase, which is involved in mRNA poly(A) tail shortening
479	YAL021C_04	252.173681808367	0.183411264980705	0.535500060881269	0.342504657569724	0.731971139491149	0.999400262816908	YAL021C	CCR4	Component of the CCR4-NOT transcriptional complex; CCR4-NOT is involved in regulation of gene expression; component of the major cytoplasmic deadenylase, which is involved in mRNA poly(A) tail shortening
480	YAL021C_09	186.52443371008	0.102171765352939	0.680284885273391	0.150189674303698	0.880614972204354	0.999400262816908	YAL021C	CCR4	Component of the CCR4-NOT transcriptional complex; CCR4-NOT is involved in regulation of gene expression; component of the major cytoplasmic deadenylase, which is involved in mRNA poly(A) tail shortening
481	YAL022C_00	129.932627574004	0.0649259898700214	0.718809243463447	0.0903243669449599	0.928029457269334	0.999400262816908	YAL022C	FUN26	High affinity, broad selectivity, nucleoside/nucleobase transporter; vacuolar membrane localized transporter which may regulate the balance of nicotinamide riboside (NmR) levels between the cytosol and vacuole, contributing to salvage of NmR for use in cytosolic NAD+ synthesis; equilibrative nucleoside transporter (ENT) family member
482	YAL022C_02	454.715209772519	-0.135266122802581	0.392199561140431	-0.344891061094653	0.730176270991245	0.999400262816908	YAL022C	FUN26	High affinity, broad selectivity, nucleoside/nucleobase transporter; vacuolar membrane localized transporter which may regulate the balance of nicotinamide riboside (NmR) levels between the cytosol and vacuole, contributing to salvage of NmR for use in cytosolic NAD+ synthesis; equilibrative nucleoside transporter (ENT) family member
483	YAL022C_03	100.810376578468	-0.114333441944159	0.782019843335943	-0.14620273758839	0.883761344501154	0.999400262816908	YAL022C	FUN26	High affinity, broad selectivity, nucleoside/nucleobase transporter; vacuolar membrane localized transporter which may regulate the balance of nicotinamide riboside (NmR) levels between the cytosol and vacuole, contributing to salvage of NmR for use in cytosolic NAD+ synthesis; equilibrative nucleoside transporter (ENT) family member
484	YAL022C_05	383.730196181057	-0.234967596093038	0.439671219233627	-0.534416595433743	0.593053339753831	0.999400262816908	YAL022C	FUN26	High affinity, broad selectivity, nucleoside/nucleobase transporter; vacuolar membrane localized transporter which may regulate the balance of nicotinamide riboside (NmR) levels between the cytosol and vacuole, contributing to salvage of NmR for use in cytosolic NAD+ synthesis; equilibrative nucleoside transporter (ENT) family member
485	YAL022C_06	131.875931060943	-0.362423347712293	0.829036076112081	-0.437162336061351	0.6619936223421	0.999400262816908	YAL022C	FUN26	High affinity, broad selectivity, nucleoside/nucleobase transporter; vacuolar membrane localized transporter which may regulate the balance of nicotinamide riboside (NmR) levels between the cytosol and vacuole, contributing to salvage of NmR for use in cytosolic NAD+ synthesis; equilibrative nucleoside transporter (ENT) family member
486	YAL022C_07	130.475864541879	-0.0952468319559588	0.791826832080668	-0.120287451873386	0.904255443891446	0.999400262816908	YAL022C	FUN26	High affinity, broad selectivity, nucleoside/nucleobase transporter; vacuolar membrane localized transporter which may regulate the balance of nicotinamide riboside (NmR) levels between the cytosol and vacuole, contributing to salvage of NmR for use in cytosolic NAD+ synthesis; equilibrative nucleoside transporter (ENT) family member
487	YAL022C_09	346.983927801065	-0.291778648275583	0.424417279875264	-0.687480604845628	0.491779918762666	0.999400262816908	YAL022C	FUN26	High affinity, broad selectivity, nucleoside/nucleobase transporter; vacuolar membrane localized transporter which may regulate the balance of nicotinamide riboside (NmR) levels between the cytosol and vacuole, contributing to salvage of NmR for use in cytosolic NAD+ synthesis; equilibrative nucleoside transporter (ENT) family member
488	YAL023C_00	492.224273103366	-0.351985447397873	0.373830482900887	-0.941564327944854	0.346415740248777	0.999400262816908	YAL023C	PMT2	Protein O-mannosyltransferase of the ER membrane; transfers mannose residues from dolichyl phosphate-D-mannose to protein serine/threonine residues; involved in ER quality control; acts in a complex with Pmt1p, can instead interact with Pmt5p; antifungal drug target; PMT2 has a paralog, PMT3, that arose from the whole genome duplication
489	YAL023C_02	192.963519835839	-0.417369481740466	0.557786960325755	-0.748259660815156	0.454303551127617	0.999400262816908	YAL023C	PMT2	Protein O-mannosyltransferase of the ER membrane; transfers mannose residues from dolichyl phosphate-D-mannose to protein serine/threonine residues; involved in ER quality control; acts in a complex with Pmt1p, can instead interact with Pmt5p; antifungal drug target; PMT2 has a paralog, PMT3, that arose from the whole genome duplication
490	YAL023C_03	44.467004678576	0.974923132315187	1.14971285797745	0.847970974274611	0.396454135781594	0.999400262816908	YAL023C	PMT2	Protein O-mannosyltransferase of the ER membrane; transfers mannose residues from dolichyl phosphate-D-mannose to protein serine/threonine residues; involved in ER quality control; acts in a complex with Pmt1p, can instead interact with Pmt5p; antifungal drug target; PMT2 has a paralog, PMT3, that arose from the whole genome duplication
491	YAL023C_04	147.299287938596	0.162927158966384	0.658304557221611	0.247495110248092	0.804525075275065	0.999400262816908	YAL023C	PMT2	Protein O-mannosyltransferase of the ER membrane; transfers mannose residues from dolichyl phosphate-D-mannose to protein serine/threonine residues; involved in ER quality control; acts in a complex with Pmt1p, can instead interact with Pmt5p; antifungal drug target; PMT2 has a paralog, PMT3, that arose from the whole genome duplication
492	YAL023C_05	44.1379585687102	-1.17618871308761	0.978766858335114	-1.20170467877132	0.229477967760076	0.999400262816908	YAL023C	PMT2	Protein O-mannosyltransferase of the ER membrane; transfers mannose residues from dolichyl phosphate-D-mannose to protein serine/threonine residues; involved in ER quality control; acts in a complex with Pmt1p, can instead interact with Pmt5p; antifungal drug target; PMT2 has a paralog, PMT3, that arose from the whole genome duplication
493	YAL024C_00	171.443574262066	0.666769049905197	0.78419771840024	0.850256299221837	0.395182607147357	0.999400262816908	YAL024C	LTE1	Protein similar to GDP/GTP exchange factors; without detectable GEF activity; required for asymmetric localization of Bfa1p at daughter-directed spindle pole bodies and for mitotic exit at low temperatures
494	YAL024C_01	140.728154156416	-1.29753218968603	0.73431306889591	-1.76700135765928	0.0772280009311837	0.961648366791934	YAL024C	LTE1	Protein similar to GDP/GTP exchange factors; without detectable GEF activity; required for asymmetric localization of Bfa1p at daughter-directed spindle pole bodies and for mitotic exit at low temperatures
495	YAL024C_03	87.0304966009695	-0.41725026951204	0.85862180626394	-0.485953497183575	0.627000137154128	0.999400262816908	YAL024C	LTE1	Protein similar to GDP/GTP exchange factors; without detectable GEF activity; required for asymmetric localization of Bfa1p at daughter-directed spindle pole bodies and for mitotic exit at low temperatures
496	YAL024C_04	234.801800922019	0.470069761363533	0.53104262347393	0.885182734087276	0.376058083009999	0.999400262816908	YAL024C	LTE1	Protein similar to GDP/GTP exchange factors; without detectable GEF activity; required for asymmetric localization of Bfa1p at daughter-directed spindle pole bodies and for mitotic exit at low temperatures
497	YAL024C_08	235.994512001545	-0.320721884549835	0.502046778714714	-0.638828687181128	0.522934383901747	0.999400262816908	YAL024C	LTE1	Protein similar to GDP/GTP exchange factors; without detectable GEF activity; required for asymmetric localization of Bfa1p at daughter-directed spindle pole bodies and for mitotic exit at low temperatures
498	YAL025C_00	73.3403207083045	-0.74987785681175	0.906704388720441	-0.827036756566263	0.408216228323488	0.999400262816908	YAL025C	MAK16	Essential nuclear protein; constituent of 66S pre-ribosomal particles; required for maturation of 25S and 5.8S rRNAs; required for maintenance of M1 satellite double-stranded RNA of the L-A virus
499	YAL025C_01	116.145886508044	-0.385979905385266	0.731333984216086	-0.527775152961059	0.597655404652767	0.999400262816908	YAL025C	MAK16	Essential nuclear protein; constituent of 66S pre-ribosomal particles; required for maturation of 25S and 5.8S rRNAs; required for maintenance of M1 satellite double-stranded RNA of the L-A virus
500	YAL025C_02	53.2552039302594	1.34326949517723	0.83684518985817	1.60515888895159	0.108458842237567	0.999400262816908	YAL025C	MAK16	Essential nuclear protein; constituent of 66S pre-ribosomal particles; required for maturation of 25S and 5.8S rRNAs; required for maintenance of M1 satellite double-stranded RNA of the L-A virus
501	YAL025C_03	114.792595943238	0.787014861320069	0.665865359173872	1.18194294158282	0.237228341712202	0.999400262816908	YAL025C	MAK16	Essential nuclear protein; constituent of 66S pre-ribosomal particles; required for maturation of 25S and 5.8S rRNAs; required for maintenance of M1 satellite double-stranded RNA of the L-A virus
502	YAL025C_04	198.705796514181	0.728391758777456	0.510378596396945	1.4271596887479	0.153533870913707	0.999400262816908	YAL025C	MAK16	Essential nuclear protein; constituent of 66S pre-ribosomal particles; required for maturation of 25S and 5.8S rRNAs; required for maintenance of M1 satellite double-stranded RNA of the L-A virus
503	YAL025C_05	336.196696861317	0.619276075316891	0.379673773535826	1.631074144389	0.102874675594248	0.999400262816908	YAL025C	MAK16	Essential nuclear protein; constituent of 66S pre-ribosomal particles; required for maturation of 25S and 5.8S rRNAs; required for maintenance of M1 satellite double-stranded RNA of the L-A virus
504	YAL025C_06	123.996203707379	1.03783475238137	0.588298283416684	1.76413017279924	0.0777100655676907	0.962161681264777	YAL025C	MAK16	Essential nuclear protein; constituent of 66S pre-ribosomal particles; required for maturation of 25S and 5.8S rRNAs; required for maintenance of M1 satellite double-stranded RNA of the L-A virus
505	YAL026C_01	131.014142497014	0.0768217402203555	0.707000986733936	0.108658603964955	0.913473276630851	0.999400262816908	YAL026C	DRS2	Trans-golgi network aminophospholipid translocase (flippase); maintains membrane lipid asymmetry in post-Golgi secretory vesicles; contributes to clathrin-coated vesicle formation, endocytosis, protein trafficking between the Golgi and endosomal system and the cellular response to mating pheromone; autoinhibited by its C-terminal tail; localizes to the trans-Golgi network; mutations in human homo…
506	YAL026C_04	134.255553554784	0.21295795397758	0.633889533238336	0.335954362410193	0.73690528173127	0.999400262816908	YAL026C	DRS2	Trans-golgi network aminophospholipid translocase (flippase); maintains membrane lipid asymmetry in post-Golgi secretory vesicles; contributes to clathrin-coated vesicle formation, endocytosis, protein trafficking between the Golgi and endosomal system and the cellular response to mating pheromone; autoinhibited by its C-terminal tail; localizes to the trans-Golgi network; mutations in human homo…
507	YAL026C_06	199.106619619668	-0.03402991642241	0.54328418824489	-0.0626374136386069	0.950055236123126	0.999400262816908	YAL026C	DRS2	Trans-golgi network aminophospholipid translocase (flippase); maintains membrane lipid asymmetry in post-Golgi secretory vesicles; contributes to clathrin-coated vesicle formation, endocytosis, protein trafficking between the Golgi and endosomal system and the cellular response to mating pheromone; autoinhibited by its C-terminal tail; localizes to the trans-Golgi network; mutations in human homo…
508	YAL026C_07	217.772869188427	-0.544863683052721	0.499684042434977	-1.09041641673723	0.275529753481217	0.999400262816908	YAL026C	DRS2	Trans-golgi network aminophospholipid translocase (flippase); maintains membrane lipid asymmetry in post-Golgi secretory vesicles; contributes to clathrin-coated vesicle formation, endocytosis, protein trafficking between the Golgi and endosomal system and the cellular response to mating pheromone; autoinhibited by its C-terminal tail; localizes to the trans-Golgi network; mutations in human homo…
509	YAL026C_09	79.5218574859906	-1.08100509121958	0.983150947297416	-1.09953114950574	0.271536454773372	0.999400262816908	YAL026C	DRS2	Trans-golgi network aminophospholipid translocase (flippase); maintains membrane lipid asymmetry in post-Golgi secretory vesicles; contributes to clathrin-coated vesicle formation, endocytosis, protein trafficking between the Golgi and endosomal system and the cellular response to mating pheromone; autoinhibited by its C-terminal tail; localizes to the trans-Golgi network; mutations in human homo…
510	YAL026C-A_00	70.0242523596208	-0.576919234693641	1.00587754254437	-0.573548180859392	0.566273586278708	0.999400262816908	NA	NA	NA
511	YAL026C-A_02	108.787808639399	-0.91955311152078	0.818034650256672	-1.12410044150606	0.260970418043213	0.999400262816908	NA	NA	NA
512	YAL026C-A_03	273.160431908463	-0.156903763489937	0.492888037528047	-0.318335507343305	0.750230453122695	0.999400262816908	NA	NA	NA
513	YAL026C-A_04	403.634682368447	-0.559298170339859	0.482769805860037	-1.15851936792834	0.246652152520516	0.999400262816908	NA	NA	NA
514	YAL026C-A_06	72.6828060907343	1.9084452709198	0.943861304627994	2.02195519782642	0.0431809805258864	0.861475193858589	NA	NA	NA
515	YAL026C-A_08	82.5254175749164	1.1336998978702	0.762207040487282	1.48739100749505	0.136911570557125	0.999400262816908	NA	NA	NA
516	YAL027W_01	258.673099219555	0.298501349869912	0.480524542352943	0.621198968128176	0.534468718289976	0.999400262816908	YAL027W	SAW1	5'- and 3'-flap DNA binding protein; recruits Rad1p-Rad10p to single-strand annealing intermediates with 3' non-homologous tails for removal during double-strand break repair; complexes with Rad1p-Rad10p and stimulates its endonuclease activity; green fluorescent protein (GFP)-fusion protein localizes to the nucleus
517	YAL027W_02	201.284835199441	-0.140846038564666	0.571033166313196	-0.246651240021698	0.805178145565065	0.999400262816908	YAL027W	SAW1	5'- and 3'-flap DNA binding protein; recruits Rad1p-Rad10p to single-strand annealing intermediates with 3' non-homologous tails for removal during double-strand break repair; complexes with Rad1p-Rad10p and stimulates its endonuclease activity; green fluorescent protein (GFP)-fusion protein localizes to the nucleus
518	YAL027W_03	80.8819097786395	1.33629004592723	0.8661955966018	1.54271165908679	0.122900751763248	0.999400262816908	YAL027W	SAW1	5'- and 3'-flap DNA binding protein; recruits Rad1p-Rad10p to single-strand annealing intermediates with 3' non-homologous tails for removal during double-strand break repair; complexes with Rad1p-Rad10p and stimulates its endonuclease activity; green fluorescent protein (GFP)-fusion protein localizes to the nucleus
519	YAL027W_04	142.635523887422	-1.06099162765791	0.587525213269669	-1.80586569511345	0.0709393207170929	0.944130372238926	YAL027W	SAW1	5'- and 3'-flap DNA binding protein; recruits Rad1p-Rad10p to single-strand annealing intermediates with 3' non-homologous tails for removal during double-strand break repair; complexes with Rad1p-Rad10p and stimulates its endonuclease activity; green fluorescent protein (GFP)-fusion protein localizes to the nucleus
520	YAL028W_00	387.72450080287	0.728497393334113	0.402016953537291	1.81210614856952	0.0699697965226834	0.94061944939907	NA	NA	NA
521	YAL028W_01	76.8396263268946	0.172996853297617	0.772003680775176	0.224088119792265	0.822688736468991	0.999400262816908	YAL028W	FRT2	Tail-anchored ER membrane protein of unknown function; interacts with homolog Frt1p; promotes growth in conditions of high Na+, alkaline pH, or cell wall stress, possibly via a role in posttranslational translocation; potential Cdc28p substrate; FRT2 has a paralog, FRT1, that arose from the whole genome duplication
522	YAL028W_04	220.803012881861	0.223540647792795	0.60218453608912	0.37121618772308	0.710476517092287	0.999400262816908	YAL028W	FRT2	Tail-anchored ER membrane protein of unknown function; interacts with homolog Frt1p; promotes growth in conditions of high Na+, alkaline pH, or cell wall stress, possibly via a role in posttranslational translocation; potential Cdc28p substrate; FRT2 has a paralog, FRT1, that arose from the whole genome duplication
523	YAL028W_05	69.9071736558455	0.496314936510365	0.853869058707444	0.581254153021622	0.561069175056555	0.999400262816908	YAL028W	FRT2	Tail-anchored ER membrane protein of unknown function; interacts with homolog Frt1p; promotes growth in conditions of high Na+, alkaline pH, or cell wall stress, possibly via a role in posttranslational translocation; potential Cdc28p substrate; FRT2 has a paralog, FRT1, that arose from the whole genome duplication
524	YAL028W_06	420.044493201907	0.197711699895392	0.411567488315665	0.480387070185073	0.630952186522709	0.999400262816908	YAL028W	FRT2	Tail-anchored ER membrane protein of unknown function; interacts with homolog Frt1p; promotes growth in conditions of high Na+, alkaline pH, or cell wall stress, possibly via a role in posttranslational translocation; potential Cdc28p substrate; FRT2 has a paralog, FRT1, that arose from the whole genome duplication
525	YAL028W_07	270.060309081935	-0.486636858275337	0.465630584834318	-1.04511360319789	0.295970467670768	0.999400262816908	YAL028W	FRT2	Tail-anchored ER membrane protein of unknown function; interacts with homolog Frt1p; promotes growth in conditions of high Na+, alkaline pH, or cell wall stress, possibly via a role in posttranslational translocation; potential Cdc28p substrate; FRT2 has a paralog, FRT1, that arose from the whole genome duplication
526	YAL029C_01	134.468699048322	0.203702238160127	0.644091139585849	0.316263065334367	0.751802843027472	0.999400262816908	YAL029C	MYO4	Type V myosin motor involved in actin-based transport of cargos; required for mRNA transport, including ASH1 mRNA, and facilitating the growth and movement of ER tubules into the growing bud along with She3p; MYO4 has a paralog, MYO2, that arose from the whole genome duplication
527	YAL029C_04	127.860117905649	0.471620985128615	0.674839247980669	0.698864191049725	0.48463690797169	0.999400262816908	YAL029C	MYO4	Type V myosin motor involved in actin-based transport of cargos; required for mRNA transport, including ASH1 mRNA, and facilitating the growth and movement of ER tubules into the growing bud along with She3p; MYO4 has a paralog, MYO2, that arose from the whole genome duplication
528	YAL029C_05	351.447587692996	-0.899599775409495	0.419894136145481	-2.14244424479843	0.0321577507471714	0.795213728224304	YAL029C	MYO4	Type V myosin motor involved in actin-based transport of cargos; required for mRNA transport, including ASH1 mRNA, and facilitating the growth and movement of ER tubules into the growing bud along with She3p; MYO4 has a paralog, MYO2, that arose from the whole genome duplication
529	YAL029C_06	240.753756990392	0.6457695209942	0.481453709081987	1.34129098771619	0.179825994712925	0.999400262816908	YAL028W	FRT2	Tail-anchored ER membrane protein of unknown function; interacts with homolog Frt1p; promotes growth in conditions of high Na+, alkaline pH, or cell wall stress, possibly via a role in posttranslational translocation; potential Cdc28p substrate; FRT2 has a paralog, FRT1, that arose from the whole genome duplication
530	YAL029C_07	253.755130993244	0.071855293228414	0.491399254249995	0.146225889858307	0.883743068072775	0.999400262816908	YAL028W	FRT2	Tail-anchored ER membrane protein of unknown function; interacts with homolog Frt1p; promotes growth in conditions of high Na+, alkaline pH, or cell wall stress, possibly via a role in posttranslational translocation; potential Cdc28p substrate; FRT2 has a paralog, FRT1, that arose from the whole genome duplication
531	YAL029C_09	267.973199865341	-0.329645465309643	0.49725962840386	-0.662924248179493	0.507379070955137	0.999400262816908	YAL029C	MYO4	Type V myosin motor involved in actin-based transport of cargos; required for mRNA transport, including ASH1 mRNA, and facilitating the growth and movement of ER tubules into the growing bud along with She3p; MYO4 has a paralog, MYO2, that arose from the whole genome duplication
532	YAL030W_00	150.791418727728	0.297397506643281	0.676373772203302	0.439694025500874	0.660158730314336	0.999400262816908	NA	NA	NA
533	YAL030W_01	156.561910564074	-1.34896849102123	0.627745902944844	-2.1489084750582	0.0316416558680893	0.789345312052494	NA	NA	NA
534	YAL030W_02	95.4115662992138	-0.469334596582913	0.91500465460084	-0.512931376056939	0.607999324640027	0.999400262816908	YAL030W	SNC1	Vesicle membrane receptor protein (v-SNARE); involved in the fusion between Golgi-derived secretory vesicles with the plasma membrane; proposed to be involved in endocytosis; member of the synaptobrevin/VAMP family of R-type v-SNARE proteins; SNC1 has a paralog, SNC2, that arose from the whole genome duplication
535	YAL030W_03	742.470291527603	0.151495417832436	0.32877305279959	0.460790251945567	0.644949096143864	0.999400262816908	NA	NA	NA
536	YAL030W_04	292.473633233779	0.347672677137363	0.598143285603969	0.581253163757082	0.561069841691453	0.999400262816908	NA	NA	NA
537	YAL030W_05	153.476256607318	0.194490724040005	0.645394039998563	0.301351905946387	0.76314616410964	0.999400262816908	NA	NA	NA
538	YAL030W_06	234.548342124182	0.172088067697328	0.532152226577238	0.323381279082839	0.746406505665706	0.999400262816908	YAL030W	SNC1	Vesicle membrane receptor protein (v-SNARE); involved in the fusion between Golgi-derived secretory vesicles with the plasma membrane; proposed to be involved in endocytosis; member of the synaptobrevin/VAMP family of R-type v-SNARE proteins; SNC1 has a paralog, SNC2, that arose from the whole genome duplication
539	YAL030W_08	252.317252943645	-0.167251172852941	0.521324826854744	-0.320819504917884	0.748347177312132	0.999400262816908	YAL030W	SNC1	Vesicle membrane receptor protein (v-SNARE); involved in the fusion between Golgi-derived secretory vesicles with the plasma membrane; proposed to be involved in endocytosis; member of the synaptobrevin/VAMP family of R-type v-SNARE proteins; SNC1 has a paralog, SNC2, that arose from the whole genome duplication
540	YAL031W-A_00	319.84978655661	0.168527383806665	0.559165459573497	0.301390904823072	0.763116428981038	0.999400262816908	NA	NA	NA
541	YAL031W-A_02	63.488943458967	1.21931613818001	0.880799095239939	1.38432946260902	0.166257596543993	0.999400262816908	NA	NA	NA
542	YAL031W-A_03	140.113051236742	-0.500088560537317	0.73016520259871	-0.684897826899263	0.493408397393038	0.999400262816908	YAL032C	PRP45	Protein required for pre-mRNA splicing; associates with the spliceosome and interacts with splicing factors Prp22p and Prp46p; orthologous to human transcriptional coactivator SKIP and can activate transcription of a reporter gene
543	YAL031W-A_05	122.399631695629	0.255083373491758	0.623782441161788	0.408930031785871	0.682591009021064	0.999400262816908	NA	NA	NA
544	YAL031W-A_06	210.575139671908	0.218738282320498	0.561400571533762	0.389629603908131	0.696810458083644	0.999400262816908	NA	NA	NA
545	YAL031W-A_07	364.295229536808	0.592106222632827	0.445405298244246	1.32936501870738	0.183727572929129	0.999400262816908	NA	NA	NA
546	YAL031W-A_08	144.053915383584	0.414122248475789	0.576956780093376	0.71776996607747	0.472899134808455	0.999400262816908	NA	NA	NA
547	YAL032C_00	79.3363877296176	-0.703132065131546	0.793054714044042	-0.886612301370795	0.375287668648753	0.999400262816908	YAL032C	PRP45	Protein required for pre-mRNA splicing; associates with the spliceosome and interacts with splicing factors Prp22p and Prp46p; orthologous to human transcriptional coactivator SKIP and can activate transcription of a reporter gene
548	YAL032C_01	133.430255252324	-0.0225840461889218	0.751921627356821	-0.0300351065420342	0.976039054820752	0.999729202745466	YAL032C	PRP45	Protein required for pre-mRNA splicing; associates with the spliceosome and interacts with splicing factors Prp22p and Prp46p; orthologous to human transcriptional coactivator SKIP and can activate transcription of a reporter gene
549	YAL032C_03	48.3419930633912	-1.09406720152293	1.06618098451032	-1.02615523763577	0.304818416803338	0.999400262816908	YAL032C	PRP45	Protein required for pre-mRNA splicing; associates with the spliceosome and interacts with splicing factors Prp22p and Prp46p; orthologous to human transcriptional coactivator SKIP and can activate transcription of a reporter gene
550	YAL032C_05	99.3718078479634	-0.356362844444936	0.633050201762394	-0.56292983313619	0.573482664558262	0.999400262816908	YAL032C	PRP45	Protein required for pre-mRNA splicing; associates with the spliceosome and interacts with splicing factors Prp22p and Prp46p; orthologous to human transcriptional coactivator SKIP and can activate transcription of a reporter gene
551	YAL032C_08	243.539507908414	0.88388548551163	0.497313937017156	1.77731895231631	0.0755157771348846	0.958593994558648	YAL032C	PRP45	Protein required for pre-mRNA splicing; associates with the spliceosome and interacts with splicing factors Prp22p and Prp46p; orthologous to human transcriptional coactivator SKIP and can activate transcription of a reporter gene
552	YAL032C_09	413.676242698908	-0.0344101181595921	0.421279167867484	-0.0816800848087887	0.934901115453865	0.999400262816908	YAL032C	PRP45	Protein required for pre-mRNA splicing; associates with the spliceosome and interacts with splicing factors Prp22p and Prp46p; orthologous to human transcriptional coactivator SKIP and can activate transcription of a reporter gene
553	YAL033W_01	118.280251054858	0.341080703235599	0.688977419630532	0.495053529357327	0.620562335473518	0.999400262816908	NA	NA	NA
554	YAL033W_02	135.794446862997	-0.221659757632531	0.702688903508394	-0.315445080356079	0.752423743436462	0.999400262816908	YAL033W	POP5	Subunit of both RNase MRP and nuclear RNase P; RNase MRP cleaves pre-rRNA, while nuclear RNase P cleaves tRNA precursors to generate mature 5' ends and facilitates turnover of nuclear RNAs
555	YAL033W_03	349.114463629095	-0.369693023644457	0.463915276374569	-0.796897714887847	0.425510438140429	0.999400262816908	YAL033W	POP5	Subunit of both RNase MRP and nuclear RNase P; RNase MRP cleaves pre-rRNA, while nuclear RNase P cleaves tRNA precursors to generate mature 5' ends and facilitates turnover of nuclear RNAs
556	YAL033W_05	84.3746641770348	0.219076916133388	0.853674865061906	0.25662805020914	0.797465919071477	0.999400262816908	YAL033W	POP5	Subunit of both RNase MRP and nuclear RNase P; RNase MRP cleaves pre-rRNA, while nuclear RNase P cleaves tRNA precursors to generate mature 5' ends and facilitates turnover of nuclear RNAs
557	YAL033W_06	126.589921912399	-0.242105056440033	0.69989527998959	-0.345916115398912	0.729405757118588	0.999400262816908	YAL033W	POP5	Subunit of both RNase MRP and nuclear RNase P; RNase MRP cleaves pre-rRNA, while nuclear RNase P cleaves tRNA precursors to generate mature 5' ends and facilitates turnover of nuclear RNAs
558	YAL033W_08	62.5125160352689	0.376258797225449	0.91394622751415	0.41168592407109	0.680569643397122	0.999400262816908	YAL033W	POP5	Subunit of both RNase MRP and nuclear RNase P; RNase MRP cleaves pre-rRNA, while nuclear RNase P cleaves tRNA precursors to generate mature 5' ends and facilitates turnover of nuclear RNAs
559	YAL033W_09	89.7876520426034	-1.34416644984858	0.921570553114907	-1.45856054678103	0.144686099152593	0.999400262816908	YAL033W	POP5	Subunit of both RNase MRP and nuclear RNase P; RNase MRP cleaves pre-rRNA, while nuclear RNase P cleaves tRNA precursors to generate mature 5' ends and facilitates turnover of nuclear RNAs
560	YAL034C_02	78.9560113642944	-0.26570485241818	0.974908411031134	-0.272543399371385	0.785204225867714	0.999400262816908	YAL034C	FUN19	Non-essential protein of unknown function; expression induced in response to heat stress; FUN19 has a paralog, YOR338W, that arose from the whole genome duplication
561	YAL034C_06	42.1474671357674	-1.82940624811385	1.08188930040119	-1.69093663042555	0.0908489062835881	0.985142525474078	YAL034C	FUN19	Non-essential protein of unknown function; expression induced in response to heat stress; FUN19 has a paralog, YOR338W, that arose from the whole genome duplication
562	YAL034C_09	74.1656189542991	0.434205367955601	0.852105055505897	0.509567881507067	0.610354230343849	0.999400262816908	YAL034C	FUN19	Non-essential protein of unknown function; expression induced in response to heat stress; FUN19 has a paralog, YOR338W, that arose from the whole genome duplication
563	YAL034C-B_00	107.642549345939	-0.75038132919164	0.786535408342838	-0.95403375516511	0.340066556233968	0.999400262816908	NA	NA	NA
564	YAL034C-B_01	296.245232637203	-0.196127484279677	0.465611300880068	-0.421225781910726	0.673590219632923	0.999400262816908	NA	NA	NA
565	YAL034C-B_02	118.24199899086	-0.7769509382181	0.698744062528788	-1.11192492342086	0.266170431603933	0.999400262816908	NA	NA	NA
566	YAL034C-B_03	265.270211519548	-0.38314254672627	0.659144210292744	-0.581272718084113	0.561056664703945	0.999400262816908	NA	NA	NA
567	YAL034C-B_06	802.650102254761	0.414116477295258	0.345772407864123	1.19765622668768	0.231050877056273	0.999400262816908	NA	NA	NA
568	YAL034C-B_07	117.310639447023	-0.18041131561565	0.677873014982856	-0.266143232770835	0.790128900336964	0.999400262816908	NA	NA	NA
569	YAL034C-B_08	303.464746345444	-0.427607419241471	0.479966218935999	-0.89091148995736	0.372976655696117	0.999400262816908	NA	NA	NA
570	YAL034W-A_01	55.7784978020926	0.140303720556932	0.935500797652545	0.149977125523566	0.880782662306792	0.999400262816908	YAL034W-A	MTW1	Essential component of the MIND kinetochore complex; joins kinetochore subunits contacting DNA to those contacting microtubules; critical to kinetochore assembly; complex consists of Mtw1p Including Nnf1p-Nsl1p-Dsn1p (MIND)
571	YAL034W-A_02	347.797445900839	-0.287018637186315	0.462859578912606	-0.620098730290096	0.535192788071589	0.999400262816908	YAL034W-A	MTW1	Essential component of the MIND kinetochore complex; joins kinetochore subunits contacting DNA to those contacting microtubules; critical to kinetochore assembly; complex consists of Mtw1p Including Nnf1p-Nsl1p-Dsn1p (MIND)
572	YAL034W-A_03	58.4225749981472	-0.101876576955053	0.920741873625986	-0.110646186377786	0.911896920884869	0.999400262816908	YAL034W-A	MTW1	Essential component of the MIND kinetochore complex; joins kinetochore subunits contacting DNA to those contacting microtubules; critical to kinetochore assembly; complex consists of Mtw1p Including Nnf1p-Nsl1p-Dsn1p (MIND)
573	YAL034W-A_05	124.074620535498	0.414813560506353	0.642442237572249	0.645682267208813	0.518485147011877	0.999400262816908	YAL034W-A	MTW1	Essential component of the MIND kinetochore complex; joins kinetochore subunits contacting DNA to those contacting microtubules; critical to kinetochore assembly; complex consists of Mtw1p Including Nnf1p-Nsl1p-Dsn1p (MIND)
574	YAL034W-A_06	457.67942189931	0.505357973496913	0.408106795429404	1.2382983551283	0.215605453488067	0.999400262816908	YAL034W-A	MTW1	Essential component of the MIND kinetochore complex; joins kinetochore subunits contacting DNA to those contacting microtubules; critical to kinetochore assembly; complex consists of Mtw1p Including Nnf1p-Nsl1p-Dsn1p (MIND)
575	YAL034W-A_07	273.935618696033	0.846874860905816	0.467206623796131	1.81263453421276	0.0698882077266705	0.94061944939907	YAL034W-A	MTW1	Essential component of the MIND kinetochore complex; joins kinetochore subunits contacting DNA to those contacting microtubules; critical to kinetochore assembly; complex consists of Mtw1p Including Nnf1p-Nsl1p-Dsn1p (MIND)
576	YAL034W-A_08	199.476002935253	0.602805593721731	0.523963271734736	1.15047299350957	0.249949111218525	0.999400262816908	YAL034W-A	MTW1	Essential component of the MIND kinetochore complex; joins kinetochore subunits contacting DNA to those contacting microtubules; critical to kinetochore assembly; complex consists of Mtw1p Including Nnf1p-Nsl1p-Dsn1p (MIND)
577	YAL034W-A_09	134.347488839864	1.30539715811189	0.605450761377744	2.15607484767444	0.0310778211586749	0.785402504884402	YAL034W-A	MTW1	Essential component of the MIND kinetochore complex; joins kinetochore subunits contacting DNA to those contacting microtubules; critical to kinetochore assembly; complex consists of Mtw1p Including Nnf1p-Nsl1p-Dsn1p (MIND)
578	YAL035W_00	125.933508085035	-0.527562867856731	0.858118464541594	-0.614790252926854	0.538693247117721	0.999400262816908	NA	NA	NA
579	YAL035W_01	95.9634369940332	0.801024554454297	0.71508700764729	1.12017774884451	0.262638024035747	0.999400262816908	YAL036C	RBG1	Member of the DRG family of GTP-binding proteins; associates with translating ribosomes; interacts with Tma46p, Ygr250cp, Gir2p and Yap1p via two-hybrid
580	YAL035W_02	70.158155022194	0.392563410863823	0.840692451203204	0.466952463177211	0.640533888931236	0.999400262816908	YAL035W	FUN12	Translation initiation factor eIF5B; GTPase that promotes Met-tRNAiMet binding to ribosomes and ribosomal subunit joining; promotes GTP-dependent maturation of 18S rRNA by Nob1p; protein abundance increases in response to DNA replication stress; homolog of bacterial IF2
581	YAL035W_03	119.442570838067	0.766588279406344	0.682691264969452	1.12289158912945	0.261483540105243	0.999400262816908	YAL035W	FUN12	Translation initiation factor eIF5B; GTPase that promotes Met-tRNAiMet binding to ribosomes and ribosomal subunit joining; promotes GTP-dependent maturation of 18S rRNA by Nob1p; protein abundance increases in response to DNA replication stress; homolog of bacterial IF2
582	YAL035W_04	76.7636963455403	0.21564925577533	0.957385839806216	0.225248010581584	0.82178634190489	0.999400262816908	YAL035W	FUN12	Translation initiation factor eIF5B; GTPase that promotes Met-tRNAiMet binding to ribosomes and ribosomal subunit joining; promotes GTP-dependent maturation of 18S rRNA by Nob1p; protein abundance increases in response to DNA replication stress; homolog of bacterial IF2
583	YAL035W_05	39.81587475434	-1.2952042228067	1.18874788374585	-1.08955333634361	0.275909947987491	0.999400262816908	YAL035W	FUN12	Translation initiation factor eIF5B; GTPase that promotes Met-tRNAiMet binding to ribosomes and ribosomal subunit joining; promotes GTP-dependent maturation of 18S rRNA by Nob1p; protein abundance increases in response to DNA replication stress; homolog of bacterial IF2
584	YAL035W_06	300.965964905958	-0.79827719398139	0.439548786277588	-1.81612876409413	0.0693506222838895	0.94061944939907	NA	NA	NA
585	YAL035W_07	315.193082249433	0.423520137728665	0.412603312388248	1.02645840450778	0.304675560509229	0.999400262816908	YAL035W	FUN12	Translation initiation factor eIF5B; GTPase that promotes Met-tRNAiMet binding to ribosomes and ribosomal subunit joining; promotes GTP-dependent maturation of 18S rRNA by Nob1p; protein abundance increases in response to DNA replication stress; homolog of bacterial IF2
586	YAL035W_09	329.459376454439	-0.321840212764833	0.424819730921114	-0.757592431187235	0.448695012661721	0.999400262816908	YAL035W	FUN12	Translation initiation factor eIF5B; GTPase that promotes Met-tRNAiMet binding to ribosomes and ribosomal subunit joining; promotes GTP-dependent maturation of 18S rRNA by Nob1p; protein abundance increases in response to DNA replication stress; homolog of bacterial IF2
587	YAL036C_01	195.122660691586	-0.851096069334921	0.597911460178128	-1.42344832976	0.154606230663149	0.999400262816908	YAL036C	RBG1	Member of the DRG family of GTP-binding proteins; associates with translating ribosomes; interacts with Tma46p, Ygr250cp, Gir2p and Yap1p via two-hybrid
588	YAL036C_09	36.3704430098938	-0.693249376704381	1.11275899410266	-0.62300047034302	0.533284212758159	0.999400262816908	YAL036C	RBG1	Member of the DRG family of GTP-binding proteins; associates with translating ribosomes; interacts with Tma46p, Ygr250cp, Gir2p and Yap1p via two-hybrid
589	YAL037C-A_01	159.956253837162	-0.498353495323598	0.625518481870001	-0.796704669434801	0.425622571429653	0.999400262816908	YAL037C-A		Putative protein of unknown function
590	YAL037C-A_02	75.1866375997162	-0.00108358034740109	0.977419395101484	-0.00110861351107995	0.9991154545768	0.999798556814869	YAL037C-A		Putative protein of unknown function
591	YAL037C-A_04	307.188178851053	-0.264153696603883	0.450809460408935	-0.585954199728341	0.557906293271418	0.999400262816908	YAL037C-A		Putative protein of unknown function
592	YAL037C-A_06	76.1394833865165	-0.0294953283366462	0.832442493080666	-0.0354322713962993	0.97173505200773	0.999400262816908	YAL037C-A		Putative protein of unknown function
593	YAL037C-A_09	241.524046891999	0.341124972809468	0.488724461343934	0.697990380656238	0.485183209845434	0.999400262816908	YAL037C-A		Putative protein of unknown function
594	YAL037C-B_03	50.6081780816024	0.53582074974394	1.11406905582746	0.480958291536035	0.630546142203888	0.999400262816908	NA	NA	NA
595	YAL037C-B_04	252.413909353367	1.1521795721759	0.555458955020396	2.07428390840074	0.0380529513823926	0.834639091929832	NA	NA	NA
596	YAL037C-B_06	94.5652469127668	-1.06984825120438	0.880515628804969	-1.21502471529821	0.224356665082901	0.999400262816908	NA	NA	NA
597	YAL037C-B_08	75.4067913732035	0.696493346459688	0.876905137777035	0.794263046770722	0.427042311941	0.999400262816908	NA	NA	NA
598	YAL037C-B_09	343.67868884635	0.347359619231895	0.410640599364851	0.845896922440608	0.39761024950496	0.999400262816908	NA	NA	NA
599	YAL037W_00	485.000446092584	-0.273664980807379	0.390313011993005	-0.701142345754753	0.483214185848702	0.999400262816908	YAL037W		Putative protein of unknown function; YAL037W has a paralog, YOR342C, that arose from the whole genome duplication
600	YAL037W_02	73.1882712775311	-0.561491710413348	0.906823109698732	-0.619185488777286	0.535794170364035	0.999400262816908	YAL037W		Putative protein of unknown function; YAL037W has a paralog, YOR342C, that arose from the whole genome duplication
601	YAL037W_03	67.6984588644816	-0.0280884959261934	0.992447340268672	-0.0283022532143513	0.977421083515915	0.999729202745466	YAL037W		Putative protein of unknown function; YAL037W has a paralog, YOR342C, that arose from the whole genome duplication
602	YAL037W_05	408.312061782051	0.516534529697664	0.424740942268903	1.21611664497991	0.223940490687528	0.999400262816908	YAL037W		Putative protein of unknown function; YAL037W has a paralog, YOR342C, that arose from the whole genome duplication
603	YAL037W_06	122.238648140483	-0.920623037260253	0.70306810005538	-1.30943650719999	0.190386531919239	0.999400262816908	YAL037W		Putative protein of unknown function; YAL037W has a paralog, YOR342C, that arose from the whole genome duplication
604	YAL037W_07	59.2354141503327	-0.833125783360652	0.914857016425774	-0.910662287551299	0.362473340423243	0.999400262816908	YAL037W		Putative protein of unknown function; YAL037W has a paralog, YOR342C, that arose from the whole genome duplication
605	YAL037W_08	327.647250425459	0.0654675779288357	0.499727740087743	0.131006491489427	0.895770172200145	0.999400262816908	YAL037W		Putative protein of unknown function; YAL037W has a paralog, YOR342C, that arose from the whole genome duplication
606	YAL038W_00	388.720532664616	-2.03035657622073	0.489096979833664	-4.15123515363197	3.3068578170475e-05	0.0133655536227417	YAL038W	CDC19	Pyruvate kinase; functions as a homotetramer in glycolysis to convert phosphoenolpyruvate to pyruvate, the input for aerobic (TCA cycle) or anaerobic (glucose fermentation) respiration; regulated via allosteric activation by fructose bisphosphate; CDC19 has a paralog, PYK2, that arose from the whole genome duplication
607	YAL038W_01	281.167576836971	-2.2683135298404	0.638894883218647	-3.55037047473757	0.000384689381226042	0.0745924261029773	YAL038W	CDC19	Pyruvate kinase; functions as a homotetramer in glycolysis to convert phosphoenolpyruvate to pyruvate, the input for aerobic (TCA cycle) or anaerobic (glucose fermentation) respiration; regulated via allosteric activation by fructose bisphosphate; CDC19 has a paralog, PYK2, that arose from the whole genome duplication
608	YAL038W_02	101.515855053054	0.237422315762302	0.789449291891561	0.300744225374407	0.763609542062204	0.999400262816908	YAL038W	CDC19	Pyruvate kinase; functions as a homotetramer in glycolysis to convert phosphoenolpyruvate to pyruvate, the input for aerobic (TCA cycle) or anaerobic (glucose fermentation) respiration; regulated via allosteric activation by fructose bisphosphate; CDC19 has a paralog, PYK2, that arose from the whole genome duplication
609	YAL038W_06	251.961303680036	-0.0897980261199067	0.493356020402728	-0.182014655555646	0.855571224546542	0.999400262816908	YAL038W	CDC19	Pyruvate kinase; functions as a homotetramer in glycolysis to convert phosphoenolpyruvate to pyruvate, the input for aerobic (TCA cycle) or anaerobic (glucose fermentation) respiration; regulated via allosteric activation by fructose bisphosphate; CDC19 has a paralog, PYK2, that arose from the whole genome duplication
610	YAL038W_07	161.562545889465	-1.85456625684524	0.758717479646137	-2.44434365438662	0.0145115963031885	0.615371472100844	YAL038W	CDC19	Pyruvate kinase; functions as a homotetramer in glycolysis to convert phosphoenolpyruvate to pyruvate, the input for aerobic (TCA cycle) or anaerobic (glucose fermentation) respiration; regulated via allosteric activation by fructose bisphosphate; CDC19 has a paralog, PYK2, that arose from the whole genome duplication
611	YAL038W_09	393.289037399805	-0.49540451911938	0.444125664936877	-1.11546023621443	0.264653249141635	0.999400262816908	YAL038W	CDC19	Pyruvate kinase; functions as a homotetramer in glycolysis to convert phosphoenolpyruvate to pyruvate, the input for aerobic (TCA cycle) or anaerobic (glucose fermentation) respiration; regulated via allosteric activation by fructose bisphosphate; CDC19 has a paralog, PYK2, that arose from the whole genome duplication
612	YAL039C_00	121.671269700175	1.10214330519421	0.619295890693109	1.77967159439845	0.075129721807884	0.958078643240739	YAL039C	CYC3	Cytochrome c heme lyase (holocytochrome c synthase); attaches heme to apo-cytochrome c (Cyc1p or Cyc7p) in mitochondrial intermembrane space; human homolog HCCS implicated in microphthalmia with linear skin defects (MLS), and can complement yeast null mutant
613	YAL039C_01	77.6017447267305	-0.332059303203836	0.942458205315326	-0.352333187117551	0.724588402106788	0.999400262816908	YAL039C	CYC3	Cytochrome c heme lyase (holocytochrome c synthase); attaches heme to apo-cytochrome c (Cyc1p or Cyc7p) in mitochondrial intermembrane space; human homolog HCCS implicated in microphthalmia with linear skin defects (MLS), and can complement yeast null mutant
614	YAL039C_02	43.3572927616854	-0.161951257257738	1.17731646228297	-0.137559664241587	0.890588435658475	0.999400262816908	YAL039C	CYC3	Cytochrome c heme lyase (holocytochrome c synthase); attaches heme to apo-cytochrome c (Cyc1p or Cyc7p) in mitochondrial intermembrane space; human homolog HCCS implicated in microphthalmia with linear skin defects (MLS), and can complement yeast null mutant
615	YAL039C_03	63.9282128315221	0.525377891181814	0.858346927438959	0.612081052994945	0.540484132580843	0.999400262816908	YAL039C	CYC3	Cytochrome c heme lyase (holocytochrome c synthase); attaches heme to apo-cytochrome c (Cyc1p or Cyc7p) in mitochondrial intermembrane space; human homolog HCCS implicated in microphthalmia with linear skin defects (MLS), and can complement yeast null mutant
616	YAL039C_05	169.83726111666	-0.542746289086407	0.662119729962854	-0.819710189147899	0.412381340061779	0.999400262816908	YAL039C	CYC3	Cytochrome c heme lyase (holocytochrome c synthase); attaches heme to apo-cytochrome c (Cyc1p or Cyc7p) in mitochondrial intermembrane space; human homolog HCCS implicated in microphthalmia with linear skin defects (MLS), and can complement yeast null mutant
617	YAL039C_06	83.5997415589167	0.544334072253522	0.754155121913516	0.721779984563899	0.470429757126419	0.999400262816908	YAL039C	CYC3	Cytochrome c heme lyase (holocytochrome c synthase); attaches heme to apo-cytochrome c (Cyc1p or Cyc7p) in mitochondrial intermembrane space; human homolog HCCS implicated in microphthalmia with linear skin defects (MLS), and can complement yeast null mutant
618	YAL039C_08	107.335222767733	0.537671846147807	0.642024293690173	0.837463397307634	0.402332143018869	0.999400262816908	YAL039C	CYC3	Cytochrome c heme lyase (holocytochrome c synthase); attaches heme to apo-cytochrome c (Cyc1p or Cyc7p) in mitochondrial intermembrane space; human homolog HCCS implicated in microphthalmia with linear skin defects (MLS), and can complement yeast null mutant
619	YAL040C_00	79.3850721960013	-0.424793136908037	0.796824620754828	-0.533107444026557	0.593959206372286	0.999400262816908	YAL040C	CLN3	G1 cyclin involved in cell cycle progression; activates Cdc28p kinase to promote G1 to S phase transition; plays a role in regulating transcription of other G1 cyclins, CLN1 and CLN2; regulated by phosphorylation and proteolysis; acetyl-CoA induces CLN3 transcription in response to nutrient repletion to promote cell-cycle entry; cell cycle arrest phenotype of the cln1 cln2 cln3 triple null mutant…
620	YAL040C_01	49.730215571038	-1.47718490149193	1.09489577562946	-1.34915572273781	0.17728695322883	0.999400262816908	YAL040C	CLN3	G1 cyclin involved in cell cycle progression; activates Cdc28p kinase to promote G1 to S phase transition; plays a role in regulating transcription of other G1 cyclins, CLN1 and CLN2; regulated by phosphorylation and proteolysis; acetyl-CoA induces CLN3 transcription in response to nutrient repletion to promote cell-cycle entry; cell cycle arrest phenotype of the cln1 cln2 cln3 triple null mutant…
621	YAL040C_02	124.439242078945	-1.50714047863634	0.774732695998483	-1.94536836565794	0.0517306592869555	0.896770821452921	YAL040C	CLN3	G1 cyclin involved in cell cycle progression; activates Cdc28p kinase to promote G1 to S phase transition; plays a role in regulating transcription of other G1 cyclins, CLN1 and CLN2; regulated by phosphorylation and proteolysis; acetyl-CoA induces CLN3 transcription in response to nutrient repletion to promote cell-cycle entry; cell cycle arrest phenotype of the cln1 cln2 cln3 triple null mutant…
622	YAL040C_03	233.005180746716	-0.36471544702695	0.503634354108811	-0.724167134452771	0.468963132938044	0.999400262816908	YAL040C	CLN3	G1 cyclin involved in cell cycle progression; activates Cdc28p kinase to promote G1 to S phase transition; plays a role in regulating transcription of other G1 cyclins, CLN1 and CLN2; regulated by phosphorylation and proteolysis; acetyl-CoA induces CLN3 transcription in response to nutrient repletion to promote cell-cycle entry; cell cycle arrest phenotype of the cln1 cln2 cln3 triple null mutant…
623	YAL040C_05	159.310544685907	0.548563357199241	0.714018414979779	0.768276203653342	0.442323109008068	0.999400262816908	YAL040C	CLN3	G1 cyclin involved in cell cycle progression; activates Cdc28p kinase to promote G1 to S phase transition; plays a role in regulating transcription of other G1 cyclins, CLN1 and CLN2; regulated by phosphorylation and proteolysis; acetyl-CoA induces CLN3 transcription in response to nutrient repletion to promote cell-cycle entry; cell cycle arrest phenotype of the cln1 cln2 cln3 triple null mutant…
624	YAL040C_07	135.386192007788	-1.38883364572904	0.716140154129579	-1.93933217921159	0.0524609029582969	0.897233046015843	YAL040C	CLN3	G1 cyclin involved in cell cycle progression; activates Cdc28p kinase to promote G1 to S phase transition; plays a role in regulating transcription of other G1 cyclins, CLN1 and CLN2; regulated by phosphorylation and proteolysis; acetyl-CoA induces CLN3 transcription in response to nutrient repletion to promote cell-cycle entry; cell cycle arrest phenotype of the cln1 cln2 cln3 triple null mutant…
625	YAL040C_08	144.078703631354	-0.773379857559651	0.748949285311696	-1.03261979512777	0.301781860783737	0.999400262816908	YAL040C	CLN3	G1 cyclin involved in cell cycle progression; activates Cdc28p kinase to promote G1 to S phase transition; plays a role in regulating transcription of other G1 cyclins, CLN1 and CLN2; regulated by phosphorylation and proteolysis; acetyl-CoA induces CLN3 transcription in response to nutrient repletion to promote cell-cycle entry; cell cycle arrest phenotype of the cln1 cln2 cln3 triple null mutant…
626	YAL040C_09	190.608241131782	-0.204827940790006	0.696201329621636	-0.294207913824761	0.768599033767396	0.999400262816908	YAL040C	CLN3	G1 cyclin involved in cell cycle progression; activates Cdc28p kinase to promote G1 to S phase transition; plays a role in regulating transcription of other G1 cyclins, CLN1 and CLN2; regulated by phosphorylation and proteolysis; acetyl-CoA induces CLN3 transcription in response to nutrient repletion to promote cell-cycle entry; cell cycle arrest phenotype of the cln1 cln2 cln3 triple null mutant…
627	YAL041W_00	294.648432481107	0.523487023739787	0.563265471566106	0.929378863370199	0.352692777755717	0.999400262816908	YAL041W	CDC24	Guanine nucleotide exchange factor (GEF) for Cdc42p; required for polarity establishment and maintenance, and mutants have morphological defects in bud formation and shmooing; relocalizes from nucleus to cytoplasm upon DNA replication stress; thermosensitivity of the cdc24-4 mutant in the presence of sorbitol is functionally complemented by human CDC42
628	YAL041W_01	281.175965703312	-0.784824847517067	0.502421468491751	-1.56208461766787	0.118268056118237	0.999400262816908	YAL041W	CDC24	Guanine nucleotide exchange factor (GEF) for Cdc42p; required for polarity establishment and maintenance, and mutants have morphological defects in bud formation and shmooing; relocalizes from nucleus to cytoplasm upon DNA replication stress; thermosensitivity of the cdc24-4 mutant in the presence of sorbitol is functionally complemented by human CDC42
629	YAL041W_04	218.906402055875	-0.502992732068504	0.528866019163786	-0.951077803909218	0.341564881312812	0.999400262816908	YAL041W	CDC24	Guanine nucleotide exchange factor (GEF) for Cdc42p; required for polarity establishment and maintenance, and mutants have morphological defects in bud formation and shmooing; relocalizes from nucleus to cytoplasm upon DNA replication stress; thermosensitivity of the cdc24-4 mutant in the presence of sorbitol is functionally complemented by human CDC42
630	YAL041W_05	181.023084563062	1.07578469907263	0.547068036890812	1.96645504129012	0.0492460707835848	0.886691305906751	YAL041W	CDC24	Guanine nucleotide exchange factor (GEF) for Cdc42p; required for polarity establishment and maintenance, and mutants have morphological defects in bud formation and shmooing; relocalizes from nucleus to cytoplasm upon DNA replication stress; thermosensitivity of the cdc24-4 mutant in the presence of sorbitol is functionally complemented by human CDC42
631	YAL041W_06	51.7675536630053	-0.858243839029715	1.04724433916099	-0.819525880385574	0.412486442365062	0.999400262816908	YAL041W	CDC24	Guanine nucleotide exchange factor (GEF) for Cdc42p; required for polarity establishment and maintenance, and mutants have morphological defects in bud formation and shmooing; relocalizes from nucleus to cytoplasm upon DNA replication stress; thermosensitivity of the cdc24-4 mutant in the presence of sorbitol is functionally complemented by human CDC42
632	YAL041W_07	228.822296577831	1.24118158816886	0.501713713517408	2.47388411902717	0.0133653040550726	0.595825923767739	YAL041W	CDC24	Guanine nucleotide exchange factor (GEF) for Cdc42p; required for polarity establishment and maintenance, and mutants have morphological defects in bud formation and shmooing; relocalizes from nucleus to cytoplasm upon DNA replication stress; thermosensitivity of the cdc24-4 mutant in the presence of sorbitol is functionally complemented by human CDC42
633	YAL041W_08	82.5719955244675	-0.0108691045762432	0.759985023816086	-0.0143017352127105	0.988589255273998	0.999761532217726	YAL041W	CDC24	Guanine nucleotide exchange factor (GEF) for Cdc42p; required for polarity establishment and maintenance, and mutants have morphological defects in bud formation and shmooing; relocalizes from nucleus to cytoplasm upon DNA replication stress; thermosensitivity of the cdc24-4 mutant in the presence of sorbitol is functionally complemented by human CDC42
634	YAL041W_09	169.282330489304	0.551006638509212	0.538258338267756	1.02368435254061	0.305984388474146	0.999400262816908	YAL041W	CDC24	Guanine nucleotide exchange factor (GEF) for Cdc42p; required for polarity establishment and maintenance, and mutants have morphological defects in bud formation and shmooing; relocalizes from nucleus to cytoplasm upon DNA replication stress; thermosensitivity of the cdc24-4 mutant in the presence of sorbitol is functionally complemented by human CDC42
635	YAL042C-A_03	139.888003452701	-0.524412912069228	0.698593644206329	-0.75066945772891	0.45285160842546	0.999400262816908	NA	NA	NA
636	YAL042C-A_04	120.303899886025	-0.8920880428861	0.696479297495825	-1.28085363928775	0.200245079354527	0.999400262816908	NA	NA	NA
637	YAL042C-A_06	294.82701460581	0.512042848906641	0.477032461480644	1.07339204404943	0.283095252652634	0.999400262816908	NA	NA	NA
638	YAL042C-A_09	75.4562946852993	-0.15624011477442	0.87373913859293	-0.178817804849659	0.858080764367715	0.999400262816908	NA	NA	NA
639	YAL042W_00	105.513668769215	-0.0308003555635882	0.721576932621209	-0.0426847840765952	0.965952809062617	0.999400262816908	NA	NA	NA
640	YAL042W_01	773.888158980848	0.178137007021842	0.32332227862021	0.55095803413872	0.581662442925399	0.999400262816908	YAL042W	ERV46	Protein localized to COPII-coated vesicles; forms a complex with Erv41p; involved in the membrane fusion stage of transport
641	YAL042W_02	173.78162935134	-0.398440935940409	0.635223293112967	-0.627245474560315	0.530498338787079	0.999400262816908	YAL042W	ERV46	Protein localized to COPII-coated vesicles; forms a complex with Erv41p; involved in the membrane fusion stage of transport
642	YAL042W_03	76.227755803112	0.571413292965974	0.827435795196177	0.690583240758272	0.489827482445871	0.999400262816908	YAL042W	ERV46	Protein localized to COPII-coated vesicles; forms a complex with Erv41p; involved in the membrane fusion stage of transport
643	YAL042W_04	261.826757890772	0.517877157344608	0.479356807229479	1.08035840846355	0.279982609269609	0.999400262816908	YAL042W	ERV46	Protein localized to COPII-coated vesicles; forms a complex with Erv41p; involved in the membrane fusion stage of transport
644	YAL042W_05	164.593784104101	0.930179819688601	0.561747045750551	1.65586953545218	0.0977482422268675	0.996496176544827	NA	NA	NA
645	YAL042W_06	191.447045682598	1.11014935080108	0.507134295929223	2.18906384307326	0.0285922000556708	0.771039532863932	NA	NA	NA
646	YAL042W_08	337.845913703037	-0.0659855162492222	0.41461580370043	-0.159148579625533	0.87355181491744	0.999400262816908	YAL042W	ERV46	Protein localized to COPII-coated vesicles; forms a complex with Erv41p; involved in the membrane fusion stage of transport
647	YAL042W_09	134.082145381703	-0.301420869208116	0.663697408902555	-0.454154054490774	0.649717949731098	0.999400262816908	YAL042W	ERV46	Protein localized to COPII-coated vesicles; forms a complex with Erv41p; involved in the membrane fusion stage of transport
648	YAL043C_02	305.487043183264	-0.467179803616178	0.548589404934265	-0.851601943847527	0.394435060360496	0.999400262816908	YAL043C	PTA1	Subunit of holo-CPF; holo-CPF is a multiprotein complex and functional homolog of mammalian CPSF, required for the cleavage and polyadenylation of mRNA and snoRNA 3' ends; involved in pre-tRNA processing; binds to the phosphorylated CTD of RNAPII
649	YAL044C_01	54.133642209715	-0.642893691648765	1.01728137104289	-0.631972343098829	0.527404949529117	0.999400262816908	YAL044C	GCV3	H subunit of the mitochondrial glycine decarboxylase complex; glycine decarboxylase is required for the catabolism of glycine to 5,10-methylene-THF; also required for all protein lipoylation; expression is regulated by levels of 5,10-methylene-THF
650	YAL044C_02	400.855118004869	0.163307731243146	0.570938385754504	0.286033896682795	0.774852159839139	0.999400262816908	YAL044C	GCV3	H subunit of the mitochondrial glycine decarboxylase complex; glycine decarboxylase is required for the catabolism of glycine to 5,10-methylene-THF; also required for all protein lipoylation; expression is regulated by levels of 5,10-methylene-THF
651	YAL044C_04	177.208968352629	0.589426251923315	0.59929140341037	0.983538640082412	0.325342407612316	0.999400262816908	YAL044C	GCV3	H subunit of the mitochondrial glycine decarboxylase complex; glycine decarboxylase is required for the catabolism of glycine to 5,10-methylene-THF; also required for all protein lipoylation; expression is regulated by levels of 5,10-methylene-THF
652	YAL044C_05	167.308666940452	0.718584498834977	0.521446314475369	1.37806036573094	0.168184651183999	0.999400262816908	YAL044C	GCV3	H subunit of the mitochondrial glycine decarboxylase complex; glycine decarboxylase is required for the catabolism of glycine to 5,10-methylene-THF; also required for all protein lipoylation; expression is regulated by levels of 5,10-methylene-THF
653	YAL044C_06	161.361199972713	0.0266585609117418	0.603467927184341	0.0441756052158816	0.964764427283307	0.999400262816908	YAL044C	GCV3	H subunit of the mitochondrial glycine decarboxylase complex; glycine decarboxylase is required for the catabolism of glycine to 5,10-methylene-THF; also required for all protein lipoylation; expression is regulated by levels of 5,10-methylene-THF
654	YAL044C_07	101.249770059502	-0.0663174672825699	0.756088669893332	-0.087711230075602	0.93010619371745	0.999400262816908	YAL044C	GCV3	H subunit of the mitochondrial glycine decarboxylase complex; glycine decarboxylase is required for the catabolism of glycine to 5,10-methylene-THF; also required for all protein lipoylation; expression is regulated by levels of 5,10-methylene-THF
655	YAL044C_08	268.471947566616	0.169747895678971	0.505918916910853	0.33552391500886	0.737229907614863	0.999400262816908	YAL044C	GCV3	H subunit of the mitochondrial glycine decarboxylase complex; glycine decarboxylase is required for the catabolism of glycine to 5,10-methylene-THF; also required for all protein lipoylation; expression is regulated by levels of 5,10-methylene-THF
656	YAL044W-A_00	109.25329271219	-1.14704479220607	0.712516363533534	-1.60985045524795	0.107430507271402	0.999400262816908	YAL044W-A	BOL1	Mitochondrial matrix protein involved in Fe-S cluster biogenesis; facilitates [4Fe-2S] cluster inception into mitochondrial proteins such as lipoate synthase and succinate dehydrogenase; interacts and may function with Grx5p at an early step in Fe-S cluster biosynthesis; forms dimeric complexes with Grx5p and Nfu1p that alter the stability of shared Fe/S clusters; sequence similarity to human BOL…
657	YAL044W-A_01	256.421248994461	-0.500965829371482	0.564078750660607	-0.888113279900701	0.374479819944345	0.999400262816908	NA	NA	NA
658	YAL044W-A_04	87.3251780271334	-0.0487803273135783	0.912043312577688	-0.053484660915622	0.957345751971788	0.999400262816908	YAL044W-A	BOL1	Mitochondrial matrix protein involved in Fe-S cluster biogenesis; facilitates [4Fe-2S] cluster inception into mitochondrial proteins such as lipoate synthase and succinate dehydrogenase; interacts and may function with Grx5p at an early step in Fe-S cluster biosynthesis; forms dimeric complexes with Grx5p and Nfu1p that alter the stability of shared Fe/S clusters; sequence similarity to human BOL…
659	YAL044W-A_09	445.344242058785	0.00711817182901832	0.385139552601121	0.018482058726361	0.985254290184385	0.999761532217726	YAL044W-A	BOL1	Mitochondrial matrix protein involved in Fe-S cluster biogenesis; facilitates [4Fe-2S] cluster inception into mitochondrial proteins such as lipoate synthase and succinate dehydrogenase; interacts and may function with Grx5p at an early step in Fe-S cluster biosynthesis; forms dimeric complexes with Grx5p and Nfu1p that alter the stability of shared Fe/S clusters; sequence similarity to human BOL…
660	YAL045C_00	195.03532120384	-0.561441502378438	0.595379744071086	-0.942997318886624	0.345682274303119	0.999400262816908	NA	NA	NA
661	YAL045C_02	104.347221573099	-1.09687696779591	0.804223045817086	-1.36389646317768	0.172600154140702	0.999400262816908	NA	NA	NA
662	YAL045C_03	314.342895920843	-0.20875157276774	0.433225100049285	-0.481854751130513	0.629909131968236	0.999400262816908	NA	NA	NA
663	YAL045C_04	138.368096081881	1.06851842838097	0.652292715228783	1.63809652236604	0.101401560337918	0.999400262816908	NA	NA	NA
664	YAL045C_05	62.620626509897	2.22800876232213	0.957774122427524	2.32623612410318	0.0200059575248	0.693464932179865	NA	NA	NA
665	YAL045C_07	648.649549884375	-0.238597616753562	0.363178825407374	-0.656970065603162	0.511200164367233	0.999400262816908	NA	NA	NA
666	YAL045C_08	160.070591596651	-0.279531436638225	0.598005532847774	-0.467439549107618	0.640185432521907	0.999400262816908	NA	NA	NA
667	YAL046C_00	230.867344450021	0.412197723728949	0.584626151509188	0.705062068579856	0.480771610605657	0.999400262816908	YAL046C	BOL3	Protein involved in Fe-S cluster transfer to mitochondrial clients; protects [4Fe-4S] clusters from damage due to oxidative stress by acting along with Nfu1p at a late step in the transfer of [4Fe-4S] clusters from the ISA complex to mitochondrial client proteins like lipoate synthase and succinate dehydrogenase; sequence similarity to human BOLA family member, BOLA3, mutations of which are assoc…
668	YAL046C_03	99.285023022901	0.342280371295405	0.700666252227018	0.488507003452058	0.625190766275992	0.999400262816908	YAL046C	BOL3	Protein involved in Fe-S cluster transfer to mitochondrial clients; protects [4Fe-4S] clusters from damage due to oxidative stress by acting along with Nfu1p at a late step in the transfer of [4Fe-4S] clusters from the ISA complex to mitochondrial client proteins like lipoate synthase and succinate dehydrogenase; sequence similarity to human BOLA family member, BOLA3, mutations of which are assoc…
669	YAL046C_04	104.033810783293	1.13006248050104	0.804310318154871	1.40500806093531	0.160018881266979	0.999400262816908	YAL046C	BOL3	Protein involved in Fe-S cluster transfer to mitochondrial clients; protects [4Fe-4S] clusters from damage due to oxidative stress by acting along with Nfu1p at a late step in the transfer of [4Fe-4S] clusters from the ISA complex to mitochondrial client proteins like lipoate synthase and succinate dehydrogenase; sequence similarity to human BOLA family member, BOLA3, mutations of which are assoc…
670	YAL046C_05	174.294576139243	0.469882598501389	0.582105823882561	0.807211643009067	0.419544558934387	0.999400262816908	YAL046C	BOL3	Protein involved in Fe-S cluster transfer to mitochondrial clients; protects [4Fe-4S] clusters from damage due to oxidative stress by acting along with Nfu1p at a late step in the transfer of [4Fe-4S] clusters from the ISA complex to mitochondrial client proteins like lipoate synthase and succinate dehydrogenase; sequence similarity to human BOLA family member, BOLA3, mutations of which are assoc…
671	YAL046C_06	187.021935478253	-0.258599358325993	0.680381298043361	-0.380080050803384	0.703885993723078	0.999400262816908	YAL046C	BOL3	Protein involved in Fe-S cluster transfer to mitochondrial clients; protects [4Fe-4S] clusters from damage due to oxidative stress by acting along with Nfu1p at a late step in the transfer of [4Fe-4S] clusters from the ISA complex to mitochondrial client proteins like lipoate synthase and succinate dehydrogenase; sequence similarity to human BOLA family member, BOLA3, mutations of which are assoc…
672	YAL046C_07	261.531938905445	-0.109210319386094	0.491087363546206	-0.222384706862487	0.824014415929823	0.999400262816908	YAL046C	BOL3	Protein involved in Fe-S cluster transfer to mitochondrial clients; protects [4Fe-4S] clusters from damage due to oxidative stress by acting along with Nfu1p at a late step in the transfer of [4Fe-4S] clusters from the ISA complex to mitochondrial client proteins like lipoate synthase and succinate dehydrogenase; sequence similarity to human BOLA family member, BOLA3, mutations of which are assoc…
673	YAL047C_01	148.563407491878	0.206151299356687	0.607432860818955	0.339381210095794	0.734322571710228	0.999400262816908	YAL047C	SPC72	Gamma-tubulin small complex (gamma-TuSC) receptor; recruits the gamma-TuSC complex to the cytoplasmic side of the SPB, connecting nuclear microtubules to the SPB; involved in astral microtubule formation, stabilization, and with Stu2p, anchoring astral MTs at the cytoplasmic face of the SPB, and regulating plus-end MT dynamics; regulated by Cdc5 kinase
674	YAL047C_02	60.6397507452533	0.80397271177863	0.887341213890767	0.906046850065053	0.364911055461526	0.999400262816908	YAL047C	SPC72	Gamma-tubulin small complex (gamma-TuSC) receptor; recruits the gamma-TuSC complex to the cytoplasmic side of the SPB, connecting nuclear microtubules to the SPB; involved in astral microtubule formation, stabilization, and with Stu2p, anchoring astral MTs at the cytoplasmic face of the SPB, and regulating plus-end MT dynamics; regulated by Cdc5 kinase
675	YAL047C_03	288.728872740193	-0.245806686803242	0.447539190328682	-0.549240585216048	0.582840355587579	0.999400262816908	YAL047C	SPC72	Gamma-tubulin small complex (gamma-TuSC) receptor; recruits the gamma-TuSC complex to the cytoplasmic side of the SPB, connecting nuclear microtubules to the SPB; involved in astral microtubule formation, stabilization, and with Stu2p, anchoring astral MTs at the cytoplasmic face of the SPB, and regulating plus-end MT dynamics; regulated by Cdc5 kinase
676	YAL047C_04	54.5921344374831	2.35182948557421	1.08675714043053	2.16408008567811	0.0304582035907626	0.782667145334574	YAL047C	SPC72	Gamma-tubulin small complex (gamma-TuSC) receptor; recruits the gamma-TuSC complex to the cytoplasmic side of the SPB, connecting nuclear microtubules to the SPB; involved in astral microtubule formation, stabilization, and with Stu2p, anchoring astral MTs at the cytoplasmic face of the SPB, and regulating plus-end MT dynamics; regulated by Cdc5 kinase
677	YAL047C_05	45.3461949163254	2.28191043983429	1.27423321532042	1.79081067138913	0.0733236822131405	0.951768133075196	YAL047C	SPC72	Gamma-tubulin small complex (gamma-TuSC) receptor; recruits the gamma-TuSC complex to the cytoplasmic side of the SPB, connecting nuclear microtubules to the SPB; involved in astral microtubule formation, stabilization, and with Stu2p, anchoring astral MTs at the cytoplasmic face of the SPB, and regulating plus-end MT dynamics; regulated by Cdc5 kinase
678	YAL047C_07	234.647416159072	-0.683623455495105	0.541572928498726	-1.26229251781501	0.20684354804274	0.999400262816908	YAL047C	SPC72	Gamma-tubulin small complex (gamma-TuSC) receptor; recruits the gamma-TuSC complex to the cytoplasmic side of the SPB, connecting nuclear microtubules to the SPB; involved in astral microtubule formation, stabilization, and with Stu2p, anchoring astral MTs at the cytoplasmic face of the SPB, and regulating plus-end MT dynamics; regulated by Cdc5 kinase
679	YAL047C_08	369.638144266807	-0.662458588814166	0.475585111981597	-1.39293382430315	0.16363980290945	0.999400262816908	YAL047C	SPC72	Gamma-tubulin small complex (gamma-TuSC) receptor; recruits the gamma-TuSC complex to the cytoplasmic side of the SPB, connecting nuclear microtubules to the SPB; involved in astral microtubule formation, stabilization, and with Stu2p, anchoring astral MTs at the cytoplasmic face of the SPB, and regulating plus-end MT dynamics; regulated by Cdc5 kinase
680	YAL047C_09	334.131259415219	-0.236668651664774	0.454680755142201	-0.520516096157965	0.602703912079612	0.999400262816908	YAL047C	SPC72	Gamma-tubulin small complex (gamma-TuSC) receptor; recruits the gamma-TuSC complex to the cytoplasmic side of the SPB, connecting nuclear microtubules to the SPB; involved in astral microtubule formation, stabilization, and with Stu2p, anchoring astral MTs at the cytoplasmic face of the SPB, and regulating plus-end MT dynamics; regulated by Cdc5 kinase
681	YAL047W-A_00	454.997589059902	0.113579097870809	0.377327394112279	0.301009414219768	0.763407315753474	0.999400262816908	NA	NA	NA
682	YAL047W-A_01	155.444792647657	-0.535829389279022	0.568940358424937	-0.941802389906774	0.346293821374715	0.999400262816908	NA	NA	NA
683	YAL047W-A_06	115.849080677717	-1.82049178811214	0.910402638774876	-1.99965565846993	0.0455374593661365	0.86929766877359	NA	NA	NA
684	YAL047W-A_09	126.861144588481	0.4369010571444	0.650681299562531	0.671451688312143	0.501932826455634	0.999400262816908	NA	NA	NA
685	YAL048C_00	277.171578779115	0.0241053707544537	0.477739007288348	0.0504571960562234	0.959758058527917	0.999400262816908	YAL048C	GEM1	Outer mitochondrial membrane GTPase, subunit of the ERMES complex; potential regulatory subunit of the ERMES complex that links the ER to mitochondria and may promote inter-organellar calcium and phospholipid exchange as well as coordinating mitochondrial DNA replication and growth; cells lacking Gem1p contain collapsed, globular, or grape-like mitochondria; ortholog of metazoan Miro GTPases
686	YAL048C_01	236.878890041565	0.660849819720519	0.548977397797106	1.20378329303233	0.228673348730717	0.999400262816908	YAL048C	GEM1	Outer mitochondrial membrane GTPase, subunit of the ERMES complex; potential regulatory subunit of the ERMES complex that links the ER to mitochondria and may promote inter-organellar calcium and phospholipid exchange as well as coordinating mitochondrial DNA replication and growth; cells lacking Gem1p contain collapsed, globular, or grape-like mitochondria; ortholog of metazoan Miro GTPases
687	YAL048C_02	111.505664811275	-0.227719591066171	0.691483761221848	-0.32932022968087	0.741913655066766	0.999400262816908	YAL048C	GEM1	Outer mitochondrial membrane GTPase, subunit of the ERMES complex; potential regulatory subunit of the ERMES complex that links the ER to mitochondria and may promote inter-organellar calcium and phospholipid exchange as well as coordinating mitochondrial DNA replication and growth; cells lacking Gem1p contain collapsed, globular, or grape-like mitochondria; ortholog of metazoan Miro GTPases
688	YAL048C_03	611.684956631502	-0.207403282539165	0.368289988448001	-0.563152105798957	0.573331312911152	0.999400262816908	YAL048C	GEM1	Outer mitochondrial membrane GTPase, subunit of the ERMES complex; potential regulatory subunit of the ERMES complex that links the ER to mitochondria and may promote inter-organellar calcium and phospholipid exchange as well as coordinating mitochondrial DNA replication and growth; cells lacking Gem1p contain collapsed, globular, or grape-like mitochondria; ortholog of metazoan Miro GTPases
689	YAL048C_04	228.922786262964	0.745274748964746	0.534153159157943	1.3952454201331	0.162941844636218	0.999400262816908	YAL048C	GEM1	Outer mitochondrial membrane GTPase, subunit of the ERMES complex; potential regulatory subunit of the ERMES complex that links the ER to mitochondria and may promote inter-organellar calcium and phospholipid exchange as well as coordinating mitochondrial DNA replication and growth; cells lacking Gem1p contain collapsed, globular, or grape-like mitochondria; ortholog of metazoan Miro GTPases
690	YAL048C_05	87.3791291032217	-0.125431881414254	0.704014521508109	-0.178166611031771	0.858592130695421	0.999400262816908	YAL048C	GEM1	Outer mitochondrial membrane GTPase, subunit of the ERMES complex; potential regulatory subunit of the ERMES complex that links the ER to mitochondria and may promote inter-organellar calcium and phospholipid exchange as well as coordinating mitochondrial DNA replication and growth; cells lacking Gem1p contain collapsed, globular, or grape-like mitochondria; ortholog of metazoan Miro GTPases
691	YAL048C_06	118.164505593093	-0.401701851598985	0.700010445592052	-0.573851224833131	0.566068481514586	0.999400262816908	YAL048C	GEM1	Outer mitochondrial membrane GTPase, subunit of the ERMES complex; potential regulatory subunit of the ERMES complex that links the ER to mitochondria and may promote inter-organellar calcium and phospholipid exchange as well as coordinating mitochondrial DNA replication and growth; cells lacking Gem1p contain collapsed, globular, or grape-like mitochondria; ortholog of metazoan Miro GTPases
692	YAL048C_07	194.261237311488	-0.123643062193214	0.609694188588838	-0.202795211939597	0.839295100499015	0.999400262816908	YAL048C	GEM1	Outer mitochondrial membrane GTPase, subunit of the ERMES complex; potential regulatory subunit of the ERMES complex that links the ER to mitochondria and may promote inter-organellar calcium and phospholipid exchange as well as coordinating mitochondrial DNA replication and growth; cells lacking Gem1p contain collapsed, globular, or grape-like mitochondria; ortholog of metazoan Miro GTPases
693	YAL048C_08	427.203926035351	0.369046639602632	0.442475567035699	0.834049757990044	0.404252945280121	0.999400262816908	YAL048C	GEM1	Outer mitochondrial membrane GTPase, subunit of the ERMES complex; potential regulatory subunit of the ERMES complex that links the ER to mitochondria and may promote inter-organellar calcium and phospholipid exchange as well as coordinating mitochondrial DNA replication and growth; cells lacking Gem1p contain collapsed, globular, or grape-like mitochondria; ortholog of metazoan Miro GTPases
694	YAL048C_09	136.883166778857	0.710240059656785	0.659016215479365	1.0777277447417	0.281155273047514	0.999400262816908	YAL048C	GEM1	Outer mitochondrial membrane GTPase, subunit of the ERMES complex; potential regulatory subunit of the ERMES complex that links the ER to mitochondria and may promote inter-organellar calcium and phospholipid exchange as well as coordinating mitochondrial DNA replication and growth; cells lacking Gem1p contain collapsed, globular, or grape-like mitochondria; ortholog of metazoan Miro GTPases
695	YAL049C_01	181.470643512381	-0.00582269501283417	0.510614573141891	-0.0114033075417457	0.99090167415489	0.999761532217726	YAL049C	AIM2	Cytoplasmic protein involved in mitochondrial function or organization; null mutant displays reduced frequency of mitochondrial genome loss; potential Hsp82p interactor
696	YAL049C_02	208.101298041347	0.110626929480919	0.554277374590713	0.199587669553728	0.841803072026792	0.999400262816908	YAL049C	AIM2	Cytoplasmic protein involved in mitochondrial function or organization; null mutant displays reduced frequency of mitochondrial genome loss; potential Hsp82p interactor
697	YAL049C_03	178.099148243753	-0.549515899249364	0.553777835351859	-0.992303888255501	0.321049307149727	0.999400262816908	YAL049C	AIM2	Cytoplasmic protein involved in mitochondrial function or organization; null mutant displays reduced frequency of mitochondrial genome loss; potential Hsp82p interactor
698	YAL049C_05	229.538648378682	0.146728362312402	0.563395265145445	0.260435916646412	0.794527541059755	0.999400262816908	YAL049C	AIM2	Cytoplasmic protein involved in mitochondrial function or organization; null mutant displays reduced frequency of mitochondrial genome loss; potential Hsp82p interactor
699	YAL049C_06	96.0251545579521	-0.323503859109281	0.866136328453495	-0.373502240330808	0.708774678237471	0.999400262816908	YAL049C	AIM2	Cytoplasmic protein involved in mitochondrial function or organization; null mutant displays reduced frequency of mitochondrial genome loss; potential Hsp82p interactor
700	YAL049C_09	191.001032830715	-0.114682416201984	0.644525650308431	-0.177933052233225	0.858775553085043	0.999400262816908	YAL049C	AIM2	Cytoplasmic protein involved in mitochondrial function or organization; null mutant displays reduced frequency of mitochondrial genome loss; potential Hsp82p interactor
701	YAL051W_00	283.201221868561	0.412347554506026	0.47498055287356	0.868135657368256	0.38532007281619	0.999400262816908	YAL051W	OAF1	Oleate-activated transcription factor; subunit of a heterodimeric complex with Pip2p, which binds to oleate-response elements (ORE) in the promoter of genes involved in beta-oxidation of fatty acids, peroxisome organization and biogenesis, activating transcription in the presence of oleate; regulates chromatin silencing at telomeres; involved in diauxic shift; OAF1 has a paralog, PIP2, that arose…
702	YAL051W_04	99.063174530947	-0.251389062991034	0.761315264961342	-0.330203628589791	0.741246105251239	0.999400262816908	YAL051W	OAF1	Oleate-activated transcription factor; subunit of a heterodimeric complex with Pip2p, which binds to oleate-response elements (ORE) in the promoter of genes involved in beta-oxidation of fatty acids, peroxisome organization and biogenesis, activating transcription in the presence of oleate; regulates chromatin silencing at telomeres; involved in diauxic shift; OAF1 has a paralog, PIP2, that arose…
703	YAL051W_06	123.029660113983	-0.163743013902221	0.719972035659954	-0.227429685865685	0.820089639029598	0.999400262816908	YAL051W	OAF1	Oleate-activated transcription factor; subunit of a heterodimeric complex with Pip2p, which binds to oleate-response elements (ORE) in the promoter of genes involved in beta-oxidation of fatty acids, peroxisome organization and biogenesis, activating transcription in the presence of oleate; regulates chromatin silencing at telomeres; involved in diauxic shift; OAF1 has a paralog, PIP2, that arose…
704	YAL051W_07	90.3744141875512	-0.640616965143418	0.908844277741688	-0.704869888970677	0.480891210329222	0.999400262816908	YAL051W	OAF1	Oleate-activated transcription factor; subunit of a heterodimeric complex with Pip2p, which binds to oleate-response elements (ORE) in the promoter of genes involved in beta-oxidation of fatty acids, peroxisome organization and biogenesis, activating transcription in the presence of oleate; regulates chromatin silencing at telomeres; involved in diauxic shift; OAF1 has a paralog, PIP2, that arose…
705	YAL051W_08	275.61249013246	-0.471155320199551	0.460096548430022	-1.02403576337893	0.305818383134064	0.999400262816908	YAL051W	OAF1	Oleate-activated transcription factor; subunit of a heterodimeric complex with Pip2p, which binds to oleate-response elements (ORE) in the promoter of genes involved in beta-oxidation of fatty acids, peroxisome organization and biogenesis, activating transcription in the presence of oleate; regulates chromatin silencing at telomeres; involved in diauxic shift; OAF1 has a paralog, PIP2, that arose…
706	YAL051W_09	303.23085782876	0.312773019726678	0.454003349055802	0.688922274201627	0.490872181492024	0.999400262816908	YAL051W	OAF1	Oleate-activated transcription factor; subunit of a heterodimeric complex with Pip2p, which binds to oleate-response elements (ORE) in the promoter of genes involved in beta-oxidation of fatty acids, peroxisome organization and biogenesis, activating transcription in the presence of oleate; regulates chromatin silencing at telomeres; involved in diauxic shift; OAF1 has a paralog, PIP2, that arose…
707	YAL053W_00	210.504327482211	0.0967685560326688	0.496267349878245	0.194992791801456	0.845398590621739	0.999400262816908	YAL053W	FLC2	Putative calcium channel involved in calcium release under hypotonic stress; required for uptake of FAD into endoplasmic reticulum; involved in cell wall maintenance; FLC2 has a paralog, YOR365C, that arose from the whole genome duplication
708	YAL053W_01	142.770044032374	1.24187326586147	0.572654719634763	2.16862486814661	0.0301111755997784	0.782667145334574	YAL053W	FLC2	Putative calcium channel involved in calcium release under hypotonic stress; required for uptake of FAD into endoplasmic reticulum; involved in cell wall maintenance; FLC2 has a paralog, YOR365C, that arose from the whole genome duplication
709	YAL053W_02	86.4021928764727	0.581777489777694	0.702624098152162	0.828006741168879	0.407666682198441	0.999400262816908	YAL053W	FLC2	Putative calcium channel involved in calcium release under hypotonic stress; required for uptake of FAD into endoplasmic reticulum; involved in cell wall maintenance; FLC2 has a paralog, YOR365C, that arose from the whole genome duplication
710	YAL053W_03	419.90490701042	0.0438439816098221	0.407058528897108	0.107709281337536	0.914226306906746	0.999400262816908	YAL053W	FLC2	Putative calcium channel involved in calcium release under hypotonic stress; required for uptake of FAD into endoplasmic reticulum; involved in cell wall maintenance; FLC2 has a paralog, YOR365C, that arose from the whole genome duplication
711	YAL053W_04	75.4807170433767	-1.20813274937083	0.796794954298759	-1.51624046168073	0.129458560350556	0.999400262816908	YAL053W	FLC2	Putative calcium channel involved in calcium release under hypotonic stress; required for uptake of FAD into endoplasmic reticulum; involved in cell wall maintenance; FLC2 has a paralog, YOR365C, that arose from the whole genome duplication
712	YAL053W_05	97.8473419151628	0.955647497553253	0.698977143556184	1.36720850797954	0.171559959332984	0.999400262816908	YAL053W	FLC2	Putative calcium channel involved in calcium release under hypotonic stress; required for uptake of FAD into endoplasmic reticulum; involved in cell wall maintenance; FLC2 has a paralog, YOR365C, that arose from the whole genome duplication
713	YAL053W_07	354.492579853661	-0.0370238707425387	0.464462186023694	-0.0797134230872565	0.936465183348331	0.999400262816908	YAL053W	FLC2	Putative calcium channel involved in calcium release under hypotonic stress; required for uptake of FAD into endoplasmic reticulum; involved in cell wall maintenance; FLC2 has a paralog, YOR365C, that arose from the whole genome duplication
714	YAL053W_09	211.497610689022	-0.228682567302308	0.708579038871469	-0.322734027902551	0.746896679430443	0.999400262816908	YAL053W	FLC2	Putative calcium channel involved in calcium release under hypotonic stress; required for uptake of FAD into endoplasmic reticulum; involved in cell wall maintenance; FLC2 has a paralog, YOR365C, that arose from the whole genome duplication
715	YAL054C_00	55.2890809542065	-1.39338990115087	0.993915083731596	-1.40192046982472	0.16093899708424	0.999400262816908	YAL054C	ACS1	Acetyl-coA synthetase isoform; along with Acs2p, acetyl-coA synthetase isoform is the nuclear source of acetyl-coA for histone acetylation; expressed during growth on nonfermentable carbon sources and under aerobic conditions
716	YAL054C_01	186.926987762335	0.859929057285307	0.604453201594364	1.42265613784008	0.154835861630299	0.999400262816908	YAL054C	ACS1	Acetyl-coA synthetase isoform; along with Acs2p, acetyl-coA synthetase isoform is the nuclear source of acetyl-coA for histone acetylation; expressed during growth on nonfermentable carbon sources and under aerobic conditions
717	YAL054C_02	212.768084422796	-0.370940523398295	0.698955204092286	-0.530707148650572	0.595621731474274	0.999400262816908	YAL054C	ACS1	Acetyl-coA synthetase isoform; along with Acs2p, acetyl-coA synthetase isoform is the nuclear source of acetyl-coA for histone acetylation; expressed during growth on nonfermentable carbon sources and under aerobic conditions
718	YAL054C_03	266.241034186243	-0.678115559607966	0.57025833096726	-1.18913748871982	0.234385568331813	0.999400262816908	YAL054C	ACS1	Acetyl-coA synthetase isoform; along with Acs2p, acetyl-coA synthetase isoform is the nuclear source of acetyl-coA for histone acetylation; expressed during growth on nonfermentable carbon sources and under aerobic conditions
719	YAL054C_05	46.1047435004596	-0.906889156988229	0.929354639730334	-0.975826792290375	0.329150305327607	0.999400262816908	YAL054C	ACS1	Acetyl-coA synthetase isoform; along with Acs2p, acetyl-coA synthetase isoform is the nuclear source of acetyl-coA for histone acetylation; expressed during growth on nonfermentable carbon sources and under aerobic conditions
720	YAL054C_06	108.732328087658	1.29293466046213	0.664209398522716	1.94657688273875	0.0515854823252568	0.896770821452921	YAL054C	ACS1	Acetyl-coA synthetase isoform; along with Acs2p, acetyl-coA synthetase isoform is the nuclear source of acetyl-coA for histone acetylation; expressed during growth on nonfermentable carbon sources and under aerobic conditions
721	YAL054C_07	45.4243816091092	1.89250774764666	0.945139881344289	2.00235730710561	0.0452463166558488	0.869134408655122	YAL054C	ACS1	Acetyl-coA synthetase isoform; along with Acs2p, acetyl-coA synthetase isoform is the nuclear source of acetyl-coA for histone acetylation; expressed during growth on nonfermentable carbon sources and under aerobic conditions
722	YAL054C_09	162.431874044812	0.934721879035378	0.594571182057822	1.5720941533027	0.115928717247306	0.999400262816908	YAL054C	ACS1	Acetyl-coA synthetase isoform; along with Acs2p, acetyl-coA synthetase isoform is the nuclear source of acetyl-coA for histone acetylation; expressed during growth on nonfermentable carbon sources and under aerobic conditions
723	YAL055W_00	42.3432777480044	-0.429808338819697	1.25760697821681	-0.341766820846631	0.732526380768369	0.999400262816908	YAL055W	PEX22	Putative peroxisomal membrane protein; required for import of peroxisomal proteins; functionally complements a Pichia pastoris pex22 mutation
724	YAL055W_02	126.10108036247	0.246145872019726	0.756083468159698	0.325553834180296	0.744761945761656	0.999400262816908	YAL055W	PEX22	Putative peroxisomal membrane protein; required for import of peroxisomal proteins; functionally complements a Pichia pastoris pex22 mutation
725	YAL055W_03	468.106028270034	0.0679320356103064	0.387242288628747	0.175425147524199	0.860745582095074	0.999400262816908	YAL055W	PEX22	Putative peroxisomal membrane protein; required for import of peroxisomal proteins; functionally complements a Pichia pastoris pex22 mutation
726	YAL055W_04	135.612318490861	-0.324341334119012	0.650477655353295	-0.49862025459253	0.618046933369029	0.999400262816908	YAL055W	PEX22	Putative peroxisomal membrane protein; required for import of peroxisomal proteins; functionally complements a Pichia pastoris pex22 mutation
727	YAL055W_07	147.63228014224	-0.20811436563151	0.579263726473794	-0.359273947461519	0.719390161969699	0.999400262816908	YAL055W	PEX22	Putative peroxisomal membrane protein; required for import of peroxisomal proteins; functionally complements a Pichia pastoris pex22 mutation
728	YAL055W_09	84.6992518029117	0.383604760626538	0.698594599553043	0.549109255742839	0.582930473714277	0.999400262816908	YAL055W	PEX22	Putative peroxisomal membrane protein; required for import of peroxisomal proteins; functionally complements a Pichia pastoris pex22 mutation
729	YAL056C-A_02	359.159901568212	0.695024868108065	0.467463376113552	1.48680068562042	0.137067460392593	0.999400262816908	NA	NA	NA
730	YAL056C-A_03	189.169430134457	1.03457893114841	0.505765354212517	2.04557097976642	0.0407985991012405	0.848930176105653	NA	NA	NA
731	YAL056C-A_05	352.326217102749	-0.529079252538127	0.420161247293764	-1.25922906014274	0.207947607972587	0.999400262816908	NA	NA	NA
732	YAL056C-A_06	155.228002701533	0.753262708178389	0.800121253248143	0.941435695053057	0.346481628494405	0.999400262816908	NA	NA	NA
733	YAL056C-A_08	101.44597725255	-0.369196266450902	0.750469204884704	-0.491953919025394	0.622751919942978	0.999400262816908	NA	NA	NA
734	YAL056W_03	115.037190820358	0.756250505206146	0.648061047212018	1.16694331260853	0.243233262951161	0.999400262816908	YAL056W	GPB2	Multistep regulator of cAMP-PKA signaling; inhibits PKA downstream of Gpa2p and Cyr1p, thereby increasing cAMP dependency; inhibits Ras activity through direct interactions with Ira1p/2p; regulated by G-alpha protein Gpa2p; GPB2 has a paralog, GPB1, that arose from the whole genome duplication
735	YAL056W_04	153.106538184729	0.224684711725777	0.586270001657605	0.383244428489449	0.701538538938285	0.999400262816908	YAL056W	GPB2	Multistep regulator of cAMP-PKA signaling; inhibits PKA downstream of Gpa2p and Cyr1p, thereby increasing cAMP dependency; inhibits Ras activity through direct interactions with Ira1p/2p; regulated by G-alpha protein Gpa2p; GPB2 has a paralog, GPB1, that arose from the whole genome duplication
736	YAL056W_05	160.877856732726	0.216071650524931	0.66668154702674	0.324100241694952	0.745862143949913	0.999400262816908	YAL056W	GPB2	Multistep regulator of cAMP-PKA signaling; inhibits PKA downstream of Gpa2p and Cyr1p, thereby increasing cAMP dependency; inhibits Ras activity through direct interactions with Ira1p/2p; regulated by G-alpha protein Gpa2p; GPB2 has a paralog, GPB1, that arose from the whole genome duplication
737	YAL056W_06	438.166748554248	-0.396398189589525	0.415055239460142	-0.955049236591051	0.339552798407262	0.999400262816908	YAL056W	GPB2	Multistep regulator of cAMP-PKA signaling; inhibits PKA downstream of Gpa2p and Cyr1p, thereby increasing cAMP dependency; inhibits Ras activity through direct interactions with Ira1p/2p; regulated by G-alpha protein Gpa2p; GPB2 has a paralog, GPB1, that arose from the whole genome duplication
738	YAL056W_07	160.956115616284	-0.419781748932662	0.622378355786389	-0.674479992804793	0.50000620136113	0.999400262816908	YAL056W	GPB2	Multistep regulator of cAMP-PKA signaling; inhibits PKA downstream of Gpa2p and Cyr1p, thereby increasing cAMP dependency; inhibits Ras activity through direct interactions with Ira1p/2p; regulated by G-alpha protein Gpa2p; GPB2 has a paralog, GPB1, that arose from the whole genome duplication
739	YAL058W_00	238.961858139217	0.353072158757858	0.492880566458514	0.716344248049343	0.473778811112946	0.999400262816908	YAL058W	CNE1	Calnexin; integral membrane ER chaperone involved in folding and quality control of glycoproteins; chaperone activity is inhibited by Mpd1p, with which Cne1p interacts; 24% identical to mammalian calnexin; Ca+ binding not yet shown in yeast
740	YAL058W_01	39.7912372206489	-0.4451005638766	1.09852256344903	-0.405181084746334	0.685344407766811	0.999400262816908	YAL058W	CNE1	Calnexin; integral membrane ER chaperone involved in folding and quality control of glycoproteins; chaperone activity is inhibited by Mpd1p, with which Cne1p interacts; 24% identical to mammalian calnexin; Ca+ binding not yet shown in yeast
741	YAL058W_03	296.782408315878	-0.23517928777391	0.570185305860902	-0.412461151412559	0.680001449541001	0.999400262816908	YAL058W	CNE1	Calnexin; integral membrane ER chaperone involved in folding and quality control of glycoproteins; chaperone activity is inhibited by Mpd1p, with which Cne1p interacts; 24% identical to mammalian calnexin; Ca+ binding not yet shown in yeast
742	YAL058W_04	181.29218686352	-0.553972861458677	0.512480437878233	-1.08096391689062	0.279713164655396	0.999400262816908	YAL058W	CNE1	Calnexin; integral membrane ER chaperone involved in folding and quality control of glycoproteins; chaperone activity is inhibited by Mpd1p, with which Cne1p interacts; 24% identical to mammalian calnexin; Ca+ binding not yet shown in yeast
743	YAL058W_06	45.1943679288402	1.62223099803739	1.07931824677088	1.503014521334	0.132835299403279	0.999400262816908	YAL058W	CNE1	Calnexin; integral membrane ER chaperone involved in folding and quality control of glycoproteins; chaperone activity is inhibited by Mpd1p, with which Cne1p interacts; 24% identical to mammalian calnexin; Ca+ binding not yet shown in yeast
744	YAL058W_07	121.346450875753	0.72423907733478	0.709047792288242	1.02142490987457	0.307053168510518	0.999400262816908	YAL058W	CNE1	Calnexin; integral membrane ER chaperone involved in folding and quality control of glycoproteins; chaperone activity is inhibited by Mpd1p, with which Cne1p interacts; 24% identical to mammalian calnexin; Ca+ binding not yet shown in yeast
745	YAL059C-A_01	179.501032547745	0.356495654272976	0.57697220906438	0.617873181190252	0.536658938757014	0.999400262816908	NA	NA	NA
746	YAL059C-A_02	80.0577732067896	0.602630038339227	0.778772416872361	0.773820470888605	0.439036965069798	0.999400262816908	NA	NA	NA
747	YAL059C-A_03	213.853216982117	-0.130929553798857	0.560288119641691	-0.23368254512087	0.815231439589793	0.999400262816908	NA	NA	NA
748	YAL059C-A_05	284.368591873335	-0.343221239151693	0.523699651470027	-0.655378017129226	0.512224401358217	0.999400262816908	NA	NA	NA
749	YAL059C-A_06	171.858689640813	-0.306595365715663	0.651556841357278	-0.470558125177513	0.637956316985327	0.999400262816908	NA	NA	NA
750	YAL059C-A_07	66.7445209350949	-0.369077331893509	0.969381922245228	-0.380734696432829	0.703400120460836	0.999400262816908	NA	NA	NA
751	YAL059C-A_08	244.624047321502	-0.286410380060371	0.471471957402572	-0.60748126280566	0.54353157368044	0.999400262816908	NA	NA	NA
752	YAL059C-A_09	136.262367760798	0.738927402388249	0.595849595129749	1.24012403201742	0.214929521388884	0.999400262816908	NA	NA	NA
753	YAL059W_00	126.482111328958	0.481117257448149	0.648338110243981	0.742077705824044	0.458040256545691	0.999400262816908	YAL059W	ECM1	Pre-ribosomal factor involved in 60S ribosomal protein subunit export; associates with the pre-60S particle; shuttles between the nucleus and cytoplasm
754	YAL059W_02	85.9766965919034	-0.75497045381446	0.713329066178695	-1.05837612626503	0.289883999110434	0.999400262816908	YAL059W	ECM1	Pre-ribosomal factor involved in 60S ribosomal protein subunit export; associates with the pre-60S particle; shuttles between the nucleus and cytoplasm
755	YAL059W_05	267.973110235336	-0.0375268712492405	0.507758263863399	-0.0739069630570036	0.941084415286078	0.999400262816908	YAL059W	ECM1	Pre-ribosomal factor involved in 60S ribosomal protein subunit export; associates with the pre-60S particle; shuttles between the nucleus and cytoplasm
756	YAL059W_06	45.1713620694958	-0.360640507368168	1.01897262624058	-0.353925609070309	0.723394634374495	0.999400262816908	YAL059W	ECM1	Pre-ribosomal factor involved in 60S ribosomal protein subunit export; associates with the pre-60S particle; shuttles between the nucleus and cytoplasm
757	YAL059W_07	89.375939451783	1.44799665105644	0.687933012142035	2.10485123623851	0.0353042595706795	0.81736762149	YAL059W	ECM1	Pre-ribosomal factor involved in 60S ribosomal protein subunit export; associates with the pre-60S particle; shuttles between the nucleus and cytoplasm
758	YAL059W_08	570.968847027812	-0.326213950397685	0.369268879788195	-0.883404934054541	0.377017525876285	0.999400262816908	YAL059W	ECM1	Pre-ribosomal factor involved in 60S ribosomal protein subunit export; associates with the pre-60S particle; shuttles between the nucleus and cytoplasm
759	YAL060W_01	246.538703883096	-0.455441175903071	0.536513921585539	-0.848889763302176	0.39594263550775	0.999400262816908	YAL060W	BDH1	NAD-dependent (R,R)-butanediol dehydrogenase; catalyzes oxidation of (R,R)-2,3-butanediol to (3R)-acetoin, oxidation of meso-butanediol to (3S)-acetoin, and reduction of acetoin; enhances use of 2,3-butanediol as an aerobic carbon source
760	YAL060W_06	401.355088644806	0.514426747079077	0.477186877625423	1.0780404306987	0.281015713559279	0.999400262816908	YAL060W	BDH1	NAD-dependent (R,R)-butanediol dehydrogenase; catalyzes oxidation of (R,R)-2,3-butanediol to (3R)-acetoin, oxidation of meso-butanediol to (3S)-acetoin, and reduction of acetoin; enhances use of 2,3-butanediol as an aerobic carbon source
761	YAL060W_09	87.7503059859303	0.193403194090487	0.92483930425786	0.209120863700407	0.834353887889184	0.999400262816908	YAL060W	BDH1	NAD-dependent (R,R)-butanediol dehydrogenase; catalyzes oxidation of (R,R)-2,3-butanediol to (3R)-acetoin, oxidation of meso-butanediol to (3S)-acetoin, and reduction of acetoin; enhances use of 2,3-butanediol as an aerobic carbon source
762	YAL061W_01	156.358293239533	0.0417117585728273	0.638760329051647	0.0653011100967334	0.94793425850347	0.999400262816908	YAL061W	BDH2	Putative medium-chain alcohol dehydrogenase with similarity to BDH1; transcription induced by constitutively active PDR1 and PDR3
763	YAL061W_04	168.175159817563	0.165051749200997	0.66417028617632	0.248508180260837	0.80374124162616	0.999400262816908	YAL061W	BDH2	Putative medium-chain alcohol dehydrogenase with similarity to BDH1; transcription induced by constitutively active PDR1 and PDR3
764	YAL061W_07	225.641888467053	0.0882329895845873	0.511840567710685	0.172383736559273	0.863135857130837	0.999400262816908	YAL061W	BDH2	Putative medium-chain alcohol dehydrogenase with similarity to BDH1; transcription induced by constitutively active PDR1 and PDR3
765	YAL061W_09	432.500838555147	0.0591671320912339	0.46311799118135	0.127758224076562	0.898340311419216	0.999400262816908	YAL061W	BDH2	Putative medium-chain alcohol dehydrogenase with similarity to BDH1; transcription induced by constitutively active PDR1 and PDR3
766	YAL062W_00	150.646079601523	0.291368761386306	0.684185241359916	0.425862388974029	0.67020812247325	0.999400262816908	YAL062W	GDH3	NADP(+)-dependent glutamate dehydrogenase; synthesizes glutamate from ammonia and alpha-ketoglutarate; rate of alpha-ketoglutarate utilization differs from Gdh1p; expression regulated by nitrogen and carbon sources; GDH3 has a paralog, GDH1, that arose from the whole genome duplication
767	YAL062W_01	97.909213672934	-0.372884286121757	0.75719968260885	-0.492451720049623	0.622400044492473	0.999400262816908	YAL062W	GDH3	NADP(+)-dependent glutamate dehydrogenase; synthesizes glutamate from ammonia and alpha-ketoglutarate; rate of alpha-ketoglutarate utilization differs from Gdh1p; expression regulated by nitrogen and carbon sources; GDH3 has a paralog, GDH1, that arose from the whole genome duplication
768	YAL062W_03	150.743124839353	-0.825864550283897	0.654320696200062	-1.26217091264279	0.206887292884341	0.999400262816908	YAL062W	GDH3	NADP(+)-dependent glutamate dehydrogenase; synthesizes glutamate from ammonia and alpha-ketoglutarate; rate of alpha-ketoglutarate utilization differs from Gdh1p; expression regulated by nitrogen and carbon sources; GDH3 has a paralog, GDH1, that arose from the whole genome duplication
769	YAL062W_06	192.704475128271	-0.326595439257517	0.546913017955642	-0.59716157512273	0.550399510682327	0.999400262816908	YAL062W	GDH3	NADP(+)-dependent glutamate dehydrogenase; synthesizes glutamate from ammonia and alpha-ketoglutarate; rate of alpha-ketoglutarate utilization differs from Gdh1p; expression regulated by nitrogen and carbon sources; GDH3 has a paralog, GDH1, that arose from the whole genome duplication
770	YAL062W_07	96.6087577514142	0.758522413804166	0.707342408199196	1.07235534729957	0.283560455902199	0.999400262816908	YAL062W	GDH3	NADP(+)-dependent glutamate dehydrogenase; synthesizes glutamate from ammonia and alpha-ketoglutarate; rate of alpha-ketoglutarate utilization differs from Gdh1p; expression regulated by nitrogen and carbon sources; GDH3 has a paralog, GDH1, that arose from the whole genome duplication
771	YAL062W_08	350.177858459111	-0.0293234027196857	0.442421123830365	-0.0662793911507015	0.947155390619828	0.999400262816908	YAL062W	GDH3	NADP(+)-dependent glutamate dehydrogenase; synthesizes glutamate from ammonia and alpha-ketoglutarate; rate of alpha-ketoglutarate utilization differs from Gdh1p; expression regulated by nitrogen and carbon sources; GDH3 has a paralog, GDH1, that arose from the whole genome duplication
772	YAL062W_09	90.3869348595427	0.0617703595913863	0.782782191038112	0.0789112990798469	0.937103175903348	0.999400262816908	YAL062W	GDH3	NADP(+)-dependent glutamate dehydrogenase; synthesizes glutamate from ammonia and alpha-ketoglutarate; rate of alpha-ketoglutarate utilization differs from Gdh1p; expression regulated by nitrogen and carbon sources; GDH3 has a paralog, GDH1, that arose from the whole genome duplication
773	YAL063C_01	103.929392279127	0.308074169192639	0.713352209528788	0.431868248359588	0.66583717304039	0.999400262816908	YAL063C	FLO9	Lectin-like protein with similarity to Flo1p; thought to be expressed and involved in flocculation
774	YAL063C_02	162.116917315524	-1.02728403718612	0.677237453666895	-1.51687422428263	0.129298442514232	0.999400262816908	YAL063C	FLO9	Lectin-like protein with similarity to Flo1p; thought to be expressed and involved in flocculation
775	YAL063C_04	137.835136009915	-0.351946483838234	0.640435610036063	-0.549542340124429	0.582633316359838	0.999400262816908	YAL063C	FLO9	Lectin-like protein with similarity to Flo1p; thought to be expressed and involved in flocculation
776	YAL063C_05	257.756882749952	-0.0663722009877136	0.533269078900801	-0.124462871772957	0.900948795784846	0.999400262816908	YAL063C	FLO9	Lectin-like protein with similarity to Flo1p; thought to be expressed and involved in flocculation
777	YAL063C_06	331.538393435573	0.3348299038351	0.461391441308219	0.725695957614062	0.468025180473069	0.999400262816908	YAL063C	FLO9	Lectin-like protein with similarity to Flo1p; thought to be expressed and involved in flocculation
778	YAL063C_07	259.966672433718	-0.623542871661933	0.494401382354428	-1.26120778362817	0.207233995029149	0.999400262816908	YAL063C	FLO9	Lectin-like protein with similarity to Flo1p; thought to be expressed and involved in flocculation
779	YAL063C_09	224.37993716392	-0.0548774458860911	0.567512174769197	-0.0966982706730642	0.922966013199146	0.999400262816908	YAL063C	FLO9	Lectin-like protein with similarity to Flo1p; thought to be expressed and involved in flocculation
780	YAL063C-A_00	271.548691276731	-0.107154928467153	0.544047784068334	-0.196958670920152	0.84385988003743	0.999400262816908	YAL063C-A		Putative protein of unknown function; identified by expression profiling and mass spectrometry
781	YAL063C-A_01	411.802192265051	0.181013470162153	0.392614425347653	0.461046407049026	0.644765310715695	0.999400262816908	NA	NA	NA
782	YAL063C-A_06	61.8869212927319	-0.445384959446652	0.952960031255347	-0.467370031101871	0.640235160157305	0.999400262816908	YAL063C-A		Putative protein of unknown function; identified by expression profiling and mass spectrometry
783	YAL064C-A_00	83.4041369172094	-0.120423237007537	0.85697828505436	-0.14052075660225	0.888248553800508	0.999400262816908	YAL064C-A	TDA8	Putative protein of unknown function; null mutant is sensitive to expression of the top1-T722A allele; not an essential gene
784	YAL064C-A_01	79.4423560584523	-2.45166224016951	0.772569409543851	-3.17338767220546	0.00150671191609505	0.181646406305444	YAL064C-A	TDA8	Putative protein of unknown function; null mutant is sensitive to expression of the top1-T722A allele; not an essential gene
785	YAL064C-A_02	135.655800754207	-0.44724547512583	0.684435452905922	-0.653451648693752	0.51346515102006	0.999400262816908	NA	NA	NA
786	YAL064C-A_05	410.468432184894	-0.0581185731465074	0.434153086910546	-0.13386654361963	0.893508106440071	0.999400262816908	YAL064C-A	TDA8	Putative protein of unknown function; null mutant is sensitive to expression of the top1-T722A allele; not an essential gene
787	YAL064C-A_06	83.8070670502756	0.123423397178664	0.934110853022468	0.132129282921087	0.894882034539259	0.999400262816908	YAL064C-A	TDA8	Putative protein of unknown function; null mutant is sensitive to expression of the top1-T722A allele; not an essential gene
788	YAL064C-A_09	199.705205860634	0.90669158554497	0.687620200439227	1.31859358547903	0.1873050193273	0.999400262816908	YAL064C-A	TDA8	Putative protein of unknown function; null mutant is sensitive to expression of the top1-T722A allele; not an essential gene
789	YAL064W_00	76.7713787890877	0.218781703686981	0.756557865118966	0.289180396865715	0.772443332336616	0.999400262816908	YAL064W		Protein of unknown function; may interact with ribosomes, based on co-purification experiments
790	YAL064W_01	103.006979118518	-1.01085082954582	0.688397587526375	-1.46841134812532	0.141992520910212	0.999400262816908	YAL064W		Protein of unknown function; may interact with ribosomes, based on co-purification experiments
791	YAL064W_03	128.037562284667	-0.944190823767288	0.682278266589608	-1.38387937884473	0.166395391925161	0.999400262816908	YAL064W		Protein of unknown function; may interact with ribosomes, based on co-purification experiments
792	YAL064W_06	389.348548766467	0.551025869821413	0.445919276457	1.23570766933317	0.216567245741811	0.999400262816908	YAL064W		Protein of unknown function; may interact with ribosomes, based on co-purification experiments
793	YAL064W_07	83.0957735095123	0.404855197364801	0.876024989065918	0.462150283859467	0.643973552765231	0.999400262816908	YAL064W		Protein of unknown function; may interact with ribosomes, based on co-purification experiments
794	YAL064W-B_01	212.435074576935	-0.828622238049434	0.546307538561707	-1.51676881529219	0.129325063046751	0.999400262816908	YAL064W-B		Fungal-specific protein of unknown function
795	YAL064W-B_02	198.699405868053	0.232927851794307	0.581272833234077	0.400720347617738	0.688626028219635	0.999400262816908	YAL064W-B		Fungal-specific protein of unknown function
796	YAL064W-B_05	147.037407070477	-0.174732272043944	0.631127123904057	-0.276857491028236	0.781889534368546	0.999400262816908	YAL064W-B		Fungal-specific protein of unknown function
797	YAL064W-B_06	93.9936507852212	0.144519547864197	0.91676916339935	0.15764006211588	0.874740433242703	0.999400262816908	YAL064W-B		Fungal-specific protein of unknown function
798	YAL064W-B_08	240.054905447695	0.53400623958591	0.582323934591784	0.917026087825593	0.359128969885783	0.999400262816908	YAL064W-B		Fungal-specific protein of unknown function
799	YAL064W-B_09	68.0756493401301	0.86866593973659	0.939554950051771	0.924550437085904	0.355199804213723	0.999400262816908	YAL064W-B		Fungal-specific protein of unknown function
800	YAL065C_01	141.313876662795	0.196749360603156	0.571910987959455	0.344020948618502	0.730830531848435	0.999400262816908	YAL065C		Putative protein of unknown function; shows sequence similarity to FLO1 and other flocculins
801	YAL065C_02	225.232278202008	0.431543609421042	0.533257584055888	0.809259206664774	0.418366065394733	0.999400262816908	YAL065C		Putative protein of unknown function; shows sequence similarity to FLO1 and other flocculins
802	YAL065C_03	89.3944033338876	-0.510193638626958	0.747237653731487	-0.682772925158683	0.494750340573256	0.999400262816908	YAL065C		Putative protein of unknown function; shows sequence similarity to FLO1 and other flocculins
803	YAL065C_05	385.307488111863	0.331919234496426	0.39328798415797	0.843959764514711	0.398691889671779	0.999400262816908	YAL065C		Putative protein of unknown function; shows sequence similarity to FLO1 and other flocculins
804	YAL065C_07	298.129915131951	-0.317105575575773	0.486840794920214	-0.651353746203093	0.514818161282101	0.999400262816908	YAL065C		Putative protein of unknown function; shows sequence similarity to FLO1 and other flocculins
805	YAL065C_08	259.507362199646	-0.181278535611621	0.521672285396868	-0.347495047534893	0.728219438479998	0.999400262816908	YAL065C		Putative protein of unknown function; shows sequence similarity to FLO1 and other flocculins
806	YAL065C_09	140.556287992832	-0.196599170365443	0.722235584322461	-0.272209199647613	0.78546116854345	0.999400262816908	YAL065C		Putative protein of unknown function; shows sequence similarity to FLO1 and other flocculins
807	YAL066W_00	276.302147610772	-0.131514428425595	0.488924551493542	-0.268987163814644	0.787939560547757	0.999400262816908	NA	NA	NA
808	YAL066W_01	189.827915072147	0.622948274871891	0.577578972351493	1.07855082108631	0.280788014732739	0.999400262816908	NA	NA	NA
809	YAL066W_02	168.362108133412	0.465185658540949	0.611438958140086	0.760804741582021	0.44677370189169	0.999400262816908	NA	NA	NA
810	YAL066W_04	171.260854933485	-0.166681216491548	0.626492685263392	-0.266054529306231	0.790197213555767	0.999400262816908	NA	NA	NA
811	YAL066W_05	111.850416272165	-0.834482197111018	0.937002438511198	-0.89058700683525	0.373150772273092	0.999400262816908	NA	NA	NA
812	YAL066W_06	92.921714488095	-0.791637972526983	0.841928284475748	-0.940267701090385	0.347080262664042	0.999400262816908	NA	NA	NA
813	YAL066W_07	208.155816625153	-0.893510733231914	0.683654805045056	-1.30696182728216	0.191225676182872	0.999400262816908	NA	NA	NA
814	YAL066W_09	249.782441886929	-0.599201687611346	0.493060937806872	-1.21526902998357	0.224263499834964	0.999400262816908	NA	NA	NA
815	YAL067C_00	101.567948629985	-0.290814777673128	0.965257197066745	-0.301282164543155	0.7631993400918	0.999400262816908	YAL067C	SEO1	Putative permease; member of the allantoate transporter subfamily of the major facilitator superfamily; mutation confers resistance to ethionine sulfoxide
816	YAL067C_01	314.903554343808	0.508503693417343	0.455621769036454	1.11606540331188	0.264394139854659	0.999400262816908	YAL067C	SEO1	Putative permease; member of the allantoate transporter subfamily of the major facilitator superfamily; mutation confers resistance to ethionine sulfoxide
817	YAL067C_02	402.820511950639	0.0376357594631607	0.386586433454	0.0973540616179926	0.922445224887385	0.999400262816908	YAL067C	SEO1	Putative permease; member of the allantoate transporter subfamily of the major facilitator superfamily; mutation confers resistance to ethionine sulfoxide
818	YAL067C_03	253.686197595225	0.00355394354127932	0.483335778223321	0.00735294944302106	0.994133248028268	0.999761532217726	YAL067C	SEO1	Putative permease; member of the allantoate transporter subfamily of the major facilitator superfamily; mutation confers resistance to ethionine sulfoxide
819	YAL067C_05	126.84177297568	-0.581263146457004	0.653078538790491	-0.890035595923133	0.373446772975191	0.999400262816908	YAL067C	SEO1	Putative permease; member of the allantoate transporter subfamily of the major facilitator superfamily; mutation confers resistance to ethionine sulfoxide
820	YAL067W-A_01	245.843314554275	0.510458997936346	0.495443462105456	1.03030726405608	0.302865790194718	0.999400262816908	NA	NA	NA
821	YAL067W-A_02	310.538274260865	-0.160962728748255	0.44457125161757	-0.362062837312563	0.7173050738154	0.999400262816908	NA	NA	NA
822	YAL067W-A_03	456.407545163505	-0.27327151304801	0.395435962252375	-0.691063886783271	0.489525393611213	0.999400262816908	YAL067W-A		Putative protein of unknown function; identified by gene-trapping, microarray-based expression analysis, and genome-wide homology searching
823	YAL067W-A_04	293.539915124395	0.0250125064291546	0.452723213427108	0.0552490035574061	0.955940089331211	0.999400262816908	NA	NA	NA
824	YAL067W-A_05	204.835780291315	0.0727080657001734	0.645804005042711	0.112585343436148	0.910359305406454	0.999400262816908	NA	NA	NA
825	YAL067W-A_06	628.022758108238	-0.0242943291695003	0.377884335440612	-0.0642903843610589	0.948739009784903	0.999400262816908	YAL067W-A		Putative protein of unknown function; identified by gene-trapping, microarray-based expression analysis, and genome-wide homology searching
826	YAL067W-A_07	102.173584978797	-0.33315698181815	0.749179724639009	-0.444695672962427	0.656539696757477	0.999400262816908	YAL067W-A		Putative protein of unknown function; identified by gene-trapping, microarray-based expression analysis, and genome-wide homology searching
827	YAL067W-A_08	195.086228383108	-0.223124140600509	0.545424846317445	-0.409083198367255	0.6824786059188	0.999400262816908	NA	NA	NA
828	YAL068C_00	98.569511119274	-0.823129684121183	0.734887606965799	-1.12007560927543	0.262681543442077	0.999400262816908	NA	NA	NA
829	YAL068C_04	122.859734905344	0.0835056587680042	0.753938204060791	0.110759288119681	0.911807230023566	0.999400262816908	YAL068C	PAU8	Protein of unknown function; member of the seripauperin multigene family encoded mainly in subtelomeric regions
830	YAL068W-A_01	197.695154257515	-0.0560881073902728	0.566644955853934	-0.0989828053895723	0.921151922363921	0.999400262816908	NA	NA	NA
831	YAL068W-A_04	98.2003800167123	0.000324619771615222	0.756870494480782	0.000428897379383131	0.999657789413313	0.999819834767408	NA	NA	NA
832	YAL068W-A_05	54.7055503786694	1.29900364493523	0.900306123545158	1.44284661734846	0.149063683764712	0.999400262816908	NA	NA	NA
833	YAL068W-A_06	194.933409993906	0.496743296207319	0.610343139484719	0.813875448205568	0.415716307075685	0.999400262816908	NA	NA	NA
834	YAL069W_01	194.142382444722	-0.0144469073617342	0.506084938384775	-0.0285464084504136	0.977226354503927	0.999729202745466	NA	NA	NA
835	YAL069W_02	116.229868194226	0.258484542630981	0.808549556345453	0.319689177493708	0.749203964704035	0.999400262816908	NA	NA	NA
836	YAL069W_05	436.105252050197	-0.0251943599975453	0.410966160871711	-0.0613051934594928	0.951116154801567	0.999400262816908	NA	NA	NA
837	YAL069W_08	129.84602856799	-0.339121729751822	0.702048665822206	-0.483045900179382	0.629063145680483	0.999400262816908	NA	NA	NA
838	YAL069W_09	206.153837198347	0.52653760660072	0.522691705510576	1.00735787664047	0.313762826157102	0.999400262816908	NA	NA	NA
839	YAR002C-A_01	251.511476176848	-0.61918090914247	0.466462378694303	-1.32739731524684	0.184377287337081	0.999400262816908	NA	NA	NA
840	YAR002C-A_02	165.812797964593	-0.580328733549487	0.717224285482573	-0.809131460403661	0.418439533844902	0.999400262816908	YAR002C-A	ERP1	Member of the p24 family involved in ER to Golgi transport; role in misfolded protein quality control; forms heterotrimeric complex with Erp2p, Emp24p, and Erv25p; localized to COPII-coated vesicles; ERP1 has a paralog, ERP6, that arose from the whole genome duplication
841	YAR002C-A_06	160.286464811837	-1.15623299628941	0.697866601828806	-1.65681090520656	0.0975577115435087	0.996132001338433	YAR002C-A	ERP1	Member of the p24 family involved in ER to Golgi transport; role in misfolded protein quality control; forms heterotrimeric complex with Erp2p, Emp24p, and Erv25p; localized to COPII-coated vesicles; ERP1 has a paralog, ERP6, that arose from the whole genome duplication
842	YAR002C-A_08	143.925964347008	-1.23038107850851	0.699254685348739	-1.75956072127694	0.0784823162752031	0.962161681264777	NA	NA	NA
843	YAR002C-A_09	250.860868048315	-0.41551775029831	0.573063059532566	-0.725082071486579	0.468401682518329	0.999400262816908	NA	NA	NA
844	YAR002W_00	459.214862783192	-0.0584286634270399	0.384668053458922	-0.151893724736565	0.879270757800104	0.999400262816908	YAR002W	NUP60	FG-nucleoporin component of central core of the nuclear pore complex; contributes directly to nucleocytoplasmic transport and maintenance of the nuclear pore complex (NPC) permeability barrier and is involved in gene tethering at the nuclear periphery; relocalizes to the cytosol in response to hypoxia; both NUP1 and NUP60 are homologous to human NUP153
845	YAR002W_01	325.804559424309	-0.172585529925747	0.446356269602366	-0.38665420803766	0.699012220989489	0.999400262816908	YAR002W	NUP60	FG-nucleoporin component of central core of the nuclear pore complex; contributes directly to nucleocytoplasmic transport and maintenance of the nuclear pore complex (NPC) permeability barrier and is involved in gene tethering at the nuclear periphery; relocalizes to the cytosol in response to hypoxia; both NUP1 and NUP60 are homologous to human NUP153
846	YAR002W_02	202.325699667048	0.597788084755003	0.582773471448331	1.02576406449895	0.305002808505692	0.999400262816908	YAR002W	NUP60	FG-nucleoporin component of central core of the nuclear pore complex; contributes directly to nucleocytoplasmic transport and maintenance of the nuclear pore complex (NPC) permeability barrier and is involved in gene tethering at the nuclear periphery; relocalizes to the cytosol in response to hypoxia; both NUP1 and NUP60 are homologous to human NUP153
847	YAR003W_09	43.3728971182143	-0.165563937702675	1.11388253082196	-0.14863680246471	0.881840231396674	0.999400262816908	YAR003W	SWD1	Subunit of the COMPASS (Set1C) complex; COMPASS methylates histone H3 on lysine 4 and is required in transcriptional silencing near telomeres; WD40 beta propeller superfamily member with similarity to mammalian Rbbp7
848	YAR007C_00	201.101751049527	-0.498194796698182	0.548878436673979	-0.907659626268208	0.36405808104636	0.999400262816908	YAR007C	RFA1	Subunit of heterotrimeric Replication Protein A (RPA); RPA is a highly conserved single-stranded DNA binding protein involved in DNA replication, repair, and recombination; RPA protects against inappropriate telomere recombination, and upon telomere uncapping, prevents cell proliferation by a checkpoint-independent pathway; role in DNA catenation/decatenation pathway of chromosome disentangling; …
849	YAR007C_01	520.651008709401	-0.319428801068767	0.377065628981159	-0.847143776885396	0.396914986990872	0.999400262816908	NA	NA	NA
850	YAR007C_05	187.224188802211	-1.08384678857548	0.631999044752359	-1.71495004236941	0.0863543866364114	0.975538417235261	NA	NA	NA
851	YAR007C_06	275.564307829496	0.208827464027383	0.475326728467323	0.439334570350675	0.660419128423048	0.999400262816908	NA	NA	NA
852	YAR007C_07	86.6580125728611	0.758012392598031	0.868370053610615	0.872914017988384	0.382709945000625	0.999400262816908	NA	NA	NA
853	YAR007C_08	285.571611554124	-0.0687720033598108	0.582070311675106	-0.118150680390992	0.905948267491028	0.999400262816908	NA	NA	NA
854	YAR007C_09	86.9876145316251	-0.734350291020296	0.762503772614669	-0.963077583868427	0.33550859010896	0.999400262816908	NA	NA	NA
855	YAR009C_00	82.3389852091908	0.245066428172165	0.846339533559162	0.289560416895065	0.772152552912856	0.999400262816908	YAR009C		Retrotransposon TYA Gag and TYB Pol genes; Gag processing produces capsid proteins, Pol is cleaved to produce protease, reverse transcriptase and integrase activities; in YARCTy1-1 TYB is mutant and probably non-functional; protein product forms cytoplasmic foci upon DNA replication stress
856	YAR009C_01	138.092524200805	0.558351777813019	0.815755390464659	0.684459807853649	0.493684860807107	0.999400262816908	YAR009C		Retrotransposon TYA Gag and TYB Pol genes; Gag processing produces capsid proteins, Pol is cleaved to produce protease, reverse transcriptase and integrase activities; in YARCTy1-1 TYB is mutant and probably non-functional; protein product forms cytoplasmic foci upon DNA replication stress
857	YAR009C_02	150.958013029473	-0.651017948774101	0.762044779006692	-0.854304060218993	0.392936538104459	0.999400262816908	YAR009C		Retrotransposon TYA Gag and TYB Pol genes; Gag processing produces capsid proteins, Pol is cleaved to produce protease, reverse transcriptase and integrase activities; in YARCTy1-1 TYB is mutant and probably non-functional; protein product forms cytoplasmic foci upon DNA replication stress
858	YAR009C_04	348.628753324915	-0.262494167275124	0.500649509717184	-0.524307249243901	0.600064855621166	0.999400262816908	NA	NA	NA
859	YAR009C_05	156.428204741296	-0.415080897157709	0.907584827192969	-0.457346668565951	0.647421890776128	0.999400262816908	NA	NA	NA
860	YAR009C_06	214.441946875895	-0.0861815675478259	0.568191632942811	-0.151676938819865	0.879441746856977	0.999400262816908	YAR009C		Retrotransposon TYA Gag and TYB Pol genes; Gag processing produces capsid proteins, Pol is cleaved to produce protease, reverse transcriptase and integrase activities; in YARCTy1-1 TYB is mutant and probably non-functional; protein product forms cytoplasmic foci upon DNA replication stress
861	YAR009C_07	377.989903509119	-0.216916868496923	0.405389187221593	-0.535083014876645	0.592592454445333	0.999400262816908	NA	NA	NA
862	YAR009C_08	50.6664098050251	-0.105677149160896	1.13450162756595	-0.0931485214240054	0.925785570447298	0.999400262816908	YAR009C		Retrotransposon TYA Gag and TYB Pol genes; Gag processing produces capsid proteins, Pol is cleaved to produce protease, reverse transcriptase and integrase activities; in YARCTy1-1 TYB is mutant and probably non-functional; protein product forms cytoplasmic foci upon DNA replication stress
863	YAR010C_01	6602.77276912021	-0.00396703654676832	0.235951773159293	-0.0168129126289301	0.986585868565327	0.999761532217726	NA	NA	NA
864	YAR010C_02	2067.23931259498	-0.16447624788464	0.321000049991266	-0.512386985264068	0.60838019775142	0.999400262816908	NA	NA	NA
865	YAR010C_03	3427.15954995353	-0.0957403352233707	0.239586879774136	-0.399605918795	0.689446796331293	0.999400262816908	NA	NA	NA
866	YAR010C_04	293.773369708379	-0.379104079957385	0.503103910506912	-0.753530378198435	0.451131263564183	0.999400262816908	YAR010C		Retrotransposon TYA Gag gene co-transcribed with TYB Pol; Gag processing produces capsid proteins; in YARCTy1-1 TYB is mutant and probably non-functional
867	YAR010C_05	43.7326139704623	0.712004961645443	1.20148881410129	0.59260223922935	0.553447380180918	0.999400262816908	YAR010C		Retrotransposon TYA Gag gene co-transcribed with TYB Pol; Gag processing produces capsid proteins; in YARCTy1-1 TYB is mutant and probably non-functional
868	YAR010C_06	4473.00334585528	-0.103482457774528	0.23144587263224	-0.447112997080565	0.654793475265144	0.999400262816908	NA	NA	NA
869	YAR010C_07	2336.91781892467	-0.132006309280218	0.243054712914474	-0.543113555369191	0.587051620087283	0.999400262816908	NA	NA	NA
870	YAR010C_08	2703.06272092866	-0.0644477822327836	0.261552339530642	-0.246404915927863	0.805368801177031	0.999400262816908	NA	NA	NA
871	YAR010C_09	2369.35439322915	-0.255779377804277	0.254751127247682	-1.00403629443255	0.315361119783645	0.999400262816908	NA	NA	NA
872	YAR014C_00	308.936254555746	-0.360632572638433	0.450279253941236	-0.800908701615415	0.423184502196518	0.999400262816908	NA	NA	NA
873	YAR014C_01	187.804515540927	-0.264487990330827	0.526700328187014	-0.502160291491059	0.615554772398721	0.999400262816908	YAR014C	BUD14	Protein involved in bud-site selection; Bud14p-Glc7p complex is a cortical regulator of dynein; forms a complex with Kel1p and Kel2p that regulates Bnr1p (formin) to affect actin cable assembly, cytokinesis, and polarized growth; diploid mutants display a random budding pattern instead of the wild-type bipolar pattern; relative distribution to the nucleus increases upon DNA replication stress
874	YAR014C_03	165.170762539473	-0.671942527221684	0.588204399551308	-1.14236229401591	0.253303457548862	0.999400262816908	YAR014C	BUD14	Protein involved in bud-site selection; Bud14p-Glc7p complex is a cortical regulator of dynein; forms a complex with Kel1p and Kel2p that regulates Bnr1p (formin) to affect actin cable assembly, cytokinesis, and polarized growth; diploid mutants display a random budding pattern instead of the wild-type bipolar pattern; relative distribution to the nucleus increases upon DNA replication stress
875	YAR014C_04	368.818895238437	-0.0822116062150962	0.544201157708831	-0.151068414777395	0.879921747868543	0.999400262816908	YAR014C	BUD14	Protein involved in bud-site selection; Bud14p-Glc7p complex is a cortical regulator of dynein; forms a complex with Kel1p and Kel2p that regulates Bnr1p (formin) to affect actin cable assembly, cytokinesis, and polarized growth; diploid mutants display a random budding pattern instead of the wild-type bipolar pattern; relative distribution to the nucleus increases upon DNA replication stress
876	YAR014C_05	329.480588982753	0.342425277243045	0.415010661660768	0.825099952547594	0.409314846663809	0.999400262816908	YAR014C	BUD14	Protein involved in bud-site selection; Bud14p-Glc7p complex is a cortical regulator of dynein; forms a complex with Kel1p and Kel2p that regulates Bnr1p (formin) to affect actin cable assembly, cytokinesis, and polarized growth; diploid mutants display a random budding pattern instead of the wild-type bipolar pattern; relative distribution to the nucleus increases upon DNA replication stress
877	YAR014C_07	184.981090821992	0.596047372672399	0.523123885542416	1.13940003342491	0.254536342032795	0.999400262816908	YAR014C	BUD14	Protein involved in bud-site selection; Bud14p-Glc7p complex is a cortical regulator of dynein; forms a complex with Kel1p and Kel2p that regulates Bnr1p (formin) to affect actin cable assembly, cytokinesis, and polarized growth; diploid mutants display a random budding pattern instead of the wild-type bipolar pattern; relative distribution to the nucleus increases upon DNA replication stress
878	YAR014C_08	258.97214151596	0.258842199941056	0.484685758803425	0.534041273628663	0.593312978745028	0.999400262816908	YAR014C	BUD14	Protein involved in bud-site selection; Bud14p-Glc7p complex is a cortical regulator of dynein; forms a complex with Kel1p and Kel2p that regulates Bnr1p (formin) to affect actin cable assembly, cytokinesis, and polarized growth; diploid mutants display a random budding pattern instead of the wild-type bipolar pattern; relative distribution to the nucleus increases upon DNA replication stress
879	YAR015W_02	329.026705987633	-1.26945152115913	0.433343479453399	-2.92943492021701	0.00339578914176277	0.294407761189831	YAR015W	ADE1	N-succinyl-5-aminoimidazole-4-carboxamide ribotide synthetase; required for 'de novo' purine nucleotide biosynthesis; red pigment accumulates in mutant cells deprived of adenine; protein abundance increases in response to DNA replication stress
880	YAR015W_04	93.4854848754098	-0.736150673826298	0.80591414917019	-0.913435599293393	0.361013489772179	0.999400262816908	YAR015W	ADE1	N-succinyl-5-aminoimidazole-4-carboxamide ribotide synthetase; required for 'de novo' purine nucleotide biosynthesis; red pigment accumulates in mutant cells deprived of adenine; protein abundance increases in response to DNA replication stress
881	YAR015W_07	166.319583051706	0.385016254005319	0.580957871707821	0.662726632610211	0.507505649552512	0.999400262816908	YAR015W	ADE1	N-succinyl-5-aminoimidazole-4-carboxamide ribotide synthetase; required for 'de novo' purine nucleotide biosynthesis; red pigment accumulates in mutant cells deprived of adenine; protein abundance increases in response to DNA replication stress
882	YAR015W_08	358.711995355521	-0.225639218741701	0.416353646493775	-0.541941257490764	0.587858973667549	0.999400262816908	YAR015W	ADE1	N-succinyl-5-aminoimidazole-4-carboxamide ribotide synthetase; required for 'de novo' purine nucleotide biosynthesis; red pigment accumulates in mutant cells deprived of adenine; protein abundance increases in response to DNA replication stress
883	YAR018C_00	93.1426714489079	0.299525855801602	0.851816425198089	0.351631932586822	0.72511431399507	0.999400262816908	YAR018C	KIN3	Nonessential serine/threonine protein kinase; possible role in DNA damage response; influences tolerance to high levels of ethanol
884	YAR018C_01	151.547125872452	0.471717816657883	0.672233095235594	0.701717633364306	0.482855274028731	0.999400262816908	YAR018C	KIN3	Nonessential serine/threonine protein kinase; possible role in DNA damage response; influences tolerance to high levels of ethanol
885	YAR018C_03	210.710189759884	-0.486008264098978	0.640535993941762	-0.758752464647859	0.448000646090146	0.999400262816908	YAR018C	KIN3	Nonessential serine/threonine protein kinase; possible role in DNA damage response; influences tolerance to high levels of ethanol
886	YAR018C_04	665.989432763074	-0.231575965036559	0.372404543391483	-0.621839795313989	0.534047215968287	0.999400262816908	YAR018C	KIN3	Nonessential serine/threonine protein kinase; possible role in DNA damage response; influences tolerance to high levels of ethanol
887	YAR018C_05	66.0815413674996	-0.200925980173193	0.8934884278475	-0.224878100164367	0.822074106513059	0.999400262816908	YAR018C	KIN3	Nonessential serine/threonine protein kinase; possible role in DNA damage response; influences tolerance to high levels of ethanol
888	YAR019C_00	196.4387962063	0.415582998198143	0.542460287591456	0.766107690653904	0.443612227317713	0.999400262816908	YAR019C	CDC15	Protein kinase of the Mitotic Exit Network; localized to the spindle pole bodies at late anaphase; promotes mitotic exit by directly switching on the kinase activity of Dbf2p; required for spindle disassembly after meiosis II; relocalizes to the cytoplasm upon DNA replication stress
889	YAR019C_02	365.919252932169	0.336734606778573	0.528822511653471	0.636762995821989	0.524279232907217	0.999400262816908	YAR019C	CDC15	Protein kinase of the Mitotic Exit Network; localized to the spindle pole bodies at late anaphase; promotes mitotic exit by directly switching on the kinase activity of Dbf2p; required for spindle disassembly after meiosis II; relocalizes to the cytoplasm upon DNA replication stress
890	YAR019C_04	621.598722605515	-0.00441659153359014	0.352394806112305	-0.0125330778348152	0.990000312485498	0.999761532217726	YAR019C	CDC15	Protein kinase of the Mitotic Exit Network; localized to the spindle pole bodies at late anaphase; promotes mitotic exit by directly switching on the kinase activity of Dbf2p; required for spindle disassembly after meiosis II; relocalizes to the cytoplasm upon DNA replication stress
891	YAR019C_05	305.70377353027	0.458581118188697	0.459960021480998	0.997002123602263	0.318763479162128	0.999400262816908	YAR019C	CDC15	Protein kinase of the Mitotic Exit Network; localized to the spindle pole bodies at late anaphase; promotes mitotic exit by directly switching on the kinase activity of Dbf2p; required for spindle disassembly after meiosis II; relocalizes to the cytoplasm upon DNA replication stress
892	YAR019C_08	239.283291702459	0.61947108121994	0.520579462652044	1.18996450237222	0.234060344363939	0.999400262816908	YAR019C	CDC15	Protein kinase of the Mitotic Exit Network; localized to the spindle pole bodies at late anaphase; promotes mitotic exit by directly switching on the kinase activity of Dbf2p; required for spindle disassembly after meiosis II; relocalizes to the cytoplasm upon DNA replication stress
893	YAR019W-A_00	177.10348992796	0.778885679395855	0.676409458150881	1.15150027843359	0.249526480772	0.999400262816908	NA	NA	NA
894	YAR019W-A_01	174.894402927986	0.0613296809266443	0.585151905903845	0.104809845627884	0.916526697401368	0.999400262816908	NA	NA	NA
895	YAR019W-A_02	300.322021541375	-0.326061015421922	0.4885481405803	-0.667408159684376	0.504511455277593	0.999400262816908	NA	NA	NA
896	YAR019W-A_03	59.665027191669	0.154121698587782	0.996115891523538	0.154722658175903	0.877039966456744	0.999400262816908	NA	NA	NA
897	YAR019W-A_05	49.6085228359599	0.464980939243924	0.99219136174046	0.468640382464401	0.639326707330111	0.999400262816908	NA	NA	NA
898	YAR020C_00	121.018254597411	-0.318120819731393	0.898705537739343	-0.353976699121731	0.723356345562927	0.999400262816908	YAR020C	PAU7	Member of the seripauperin multigene family; active during alcoholic fermentation, regulated by anaerobiosis, inhibited by oxygen, repressed by heme
899	YAR020C_01	156.271536879885	-0.528903224801197	0.636763247616141	-0.830612047383794	0.406192826721815	0.999400262816908	YAR020C	PAU7	Member of the seripauperin multigene family; active during alcoholic fermentation, regulated by anaerobiosis, inhibited by oxygen, repressed by heme
900	YAR020C_02	111.906105325596	-0.682484805066397	0.851843518924947	-0.801185651946632	0.423024176309616	0.999400262816908	YAR020C	PAU7	Member of the seripauperin multigene family; active during alcoholic fermentation, regulated by anaerobiosis, inhibited by oxygen, repressed by heme
901	YAR020C_04	322.57175991043	-0.0272521075555965	0.478846706507333	-0.0569119661579612	0.954615322148398	0.999400262816908	YAR020C	PAU7	Member of the seripauperin multigene family; active during alcoholic fermentation, regulated by anaerobiosis, inhibited by oxygen, repressed by heme
902	YAR020C_05	629.294523387917	0.00207406520599357	0.371463146057297	0.00558350196515498	0.995545033134435	0.999761532217726	YAR020C	PAU7	Member of the seripauperin multigene family; active during alcoholic fermentation, regulated by anaerobiosis, inhibited by oxygen, repressed by heme
903	YAR020C_06	385.739743791398	0.563600170960247	0.472368932929391	1.1931355592441	0.232816287112054	0.999400262816908	YAR020C	PAU7	Member of the seripauperin multigene family; active during alcoholic fermentation, regulated by anaerobiosis, inhibited by oxygen, repressed by heme
904	YAR020C_07	50.3466336651226	-0.0540249561105392	1.00528128478503	-0.0537411338778597	0.957141410041021	0.999400262816908	YAR020C	PAU7	Member of the seripauperin multigene family; active during alcoholic fermentation, regulated by anaerobiosis, inhibited by oxygen, repressed by heme
905	YAR020C_08	112.558961354228	-0.152966230057014	0.691670851790317	-0.221154657104715	0.824972013476711	0.999400262816908	YAR020C	PAU7	Member of the seripauperin multigene family; active during alcoholic fermentation, regulated by anaerobiosis, inhibited by oxygen, repressed by heme
906	YAR020C_09	134.258496479029	-0.217829667910619	0.666857716194598	-0.326650892117822	0.743931946758051	0.999400262816908	YAR020C	PAU7	Member of the seripauperin multigene family; active during alcoholic fermentation, regulated by anaerobiosis, inhibited by oxygen, repressed by heme
907	YAR023C_01	114.238200068201	-0.394698190157394	0.827343057937795	-0.477067144482005	0.633314309723165	0.999400262816908	YAR023C		Putative integral membrane protein; member of DUP240 gene family
908	YAR023C_02	91.5528575519223	0.509377048990005	0.869847873468938	0.585593256621549	0.558148881035945	0.999400262816908	YAR023C		Putative integral membrane protein; member of DUP240 gene family
909	YAR023C_04	69.1942114527781	-0.326069617838529	0.823692548442746	-0.395863260454388	0.692205905601193	0.999400262816908	YAR023C		Putative integral membrane protein; member of DUP240 gene family
910	YAR023C_05	54.8996382101075	0.737912780092182	1.02757051470238	0.718114007296042	0.472686994101096	0.999400262816908	YAR023C		Putative integral membrane protein; member of DUP240 gene family
911	YAR023C_07	145.177933835071	0.317969674292854	0.698890003568272	0.454963832175906	0.64913525906457	0.999400262816908	YAR023C		Putative integral membrane protein; member of DUP240 gene family
912	YAR023C_08	72.5899995968483	0.710884205104085	0.856595693717446	0.82989467530358	0.406598335679997	0.999400262816908	YAR023C		Putative integral membrane protein; member of DUP240 gene family
913	YAR023C_09	31.5009167820493	0.603672236263852	1.17869053344403	0.51215498821389	0.608542542559885	0.999400262816908	YAR023C		Putative integral membrane protein; member of DUP240 gene family
914	YAR027W_01	95.4009887155674	-0.925229818744757	0.806310810130759	-1.14748532094555	0.25118109646794	0.999400262816908	YAR027W	UIP3	Putative integral membrane protein of unknown function; interacts with Ulp1p at the nuclear periphery; member of DUP240 gene family
915	YAR027W_05	334.612109207193	0.0276844460961818	0.45228712881164	0.061209891532667	0.951192052201908	0.999400262816908	YAR027W	UIP3	Putative integral membrane protein of unknown function; interacts with Ulp1p at the nuclear periphery; member of DUP240 gene family
916	YAR027W_06	190.645499840546	-0.865379660299705	0.593597531092694	-1.45785589557072	0.144880267587929	0.999400262816908	YAR027W	UIP3	Putative integral membrane protein of unknown function; interacts with Ulp1p at the nuclear periphery; member of DUP240 gene family
917	YAR027W_07	138.492159710003	-0.251968015680629	0.758749746778797	-0.332083162795554	0.739826463537798	0.999400262816908	YAR027W	UIP3	Putative integral membrane protein of unknown function; interacts with Ulp1p at the nuclear periphery; member of DUP240 gene family
918	YAR027W_08	59.4418392788887	-0.635324775833602	0.909780143262457	-0.698327810887735	0.484972210643562	0.999400262816908	YAR027W	UIP3	Putative integral membrane protein of unknown function; interacts with Ulp1p at the nuclear periphery; member of DUP240 gene family
919	YAR027W_09	110.349646249976	0.861981853381755	0.659005747670863	1.30800354386631	0.190872107278761	0.999400262816908	YAR027W	UIP3	Putative integral membrane protein of unknown function; interacts with Ulp1p at the nuclear periphery; member of DUP240 gene family
920	YAR028W_02	89.9079753311632	0.407355188531209	0.842592413047196	0.483454612483428	0.628772979228017	0.999400262816908	YAR028W		Putative integral membrane protein; member of DUP240 gene family; GFP-fusion protein is induced in response to the DNA-damaging agent MMS
921	YAR028W_03	193.695679972582	0.864256910973478	0.618800409235762	1.39666506045279	0.162514315674372	0.999400262816908	YAR028W		Putative integral membrane protein; member of DUP240 gene family; GFP-fusion protein is induced in response to the DNA-damaging agent MMS
922	YAR028W_04	154.045976897247	1.21980714124129	0.673358499338405	1.8115270579339	0.0700593045203662	0.94061944939907	YAR028W		Putative integral membrane protein; member of DUP240 gene family; GFP-fusion protein is induced in response to the DNA-damaging agent MMS
923	YAR028W_05	167.233950687109	-0.20092831673555	0.633473864160106	-0.317184856555923	0.751103339848402	0.999400262816908	YAR028W		Putative integral membrane protein; member of DUP240 gene family; GFP-fusion protein is induced in response to the DNA-damaging agent MMS
924	YAR028W_06	63.0628623536162	-1.08095454225918	0.893799488067944	-1.2093926621012	0.226512026412038	0.999400262816908	YAR028W		Putative integral membrane protein; member of DUP240 gene family; GFP-fusion protein is induced in response to the DNA-damaging agent MMS
925	YAR028W_07	85.8495717923503	1.46826996720392	0.75508932579356	1.94449837528936	0.0518353811558802	0.896770821452921	YAR028W		Putative integral membrane protein; member of DUP240 gene family; GFP-fusion protein is induced in response to the DNA-damaging agent MMS
926	YAR028W_08	183.475775990467	0.725374755520578	0.537135198031502	1.35045098176202	0.176871366995957	0.999400262816908	YAR028W		Putative integral membrane protein; member of DUP240 gene family; GFP-fusion protein is induced in response to the DNA-damaging agent MMS
927	YAR029W_02	172.964751006939	-0.39802155941843	0.562050713717848	-0.70815951248527	0.478846205736484	0.999400262816908	YAR029W		Member of DUP240 gene family but contains no transmembrane domains; green fluorescent protein (GFP)-fusion protein localizes to the cytoplasm in a punctate pattern
928	YAR029W_03	182.474524099781	-0.768973413462501	0.661538252229178	-1.16240203929448	0.245072195323854	0.999400262816908	YAR029W		Member of DUP240 gene family but contains no transmembrane domains; green fluorescent protein (GFP)-fusion protein localizes to the cytoplasm in a punctate pattern
929	YAR029W_04	317.374424871292	-0.858804112338969	0.461402073885643	-1.86129226751551	0.0627029145392933	0.926681032656344	YAR029W		Member of DUP240 gene family but contains no transmembrane domains; green fluorescent protein (GFP)-fusion protein localizes to the cytoplasm in a punctate pattern
930	YAR029W_07	382.724600500861	0.36827540286451	0.390171299381512	0.943881324557417	0.345230296421379	0.999400262816908	YAR029W		Member of DUP240 gene family but contains no transmembrane domains; green fluorescent protein (GFP)-fusion protein localizes to the cytoplasm in a punctate pattern
931	YAR029W_08	143.858270975544	0.649727380311251	0.634650883595981	1.02375557508066	0.305950738351285	0.999400262816908	YAR029W		Member of DUP240 gene family but contains no transmembrane domains; green fluorescent protein (GFP)-fusion protein localizes to the cytoplasm in a punctate pattern
932	YAR029W_09	81.0453148795887	0.756688078025814	0.836313308149183	0.904790191250711	0.365576549067504	0.999400262816908	YAR029W		Member of DUP240 gene family but contains no transmembrane domains; green fluorescent protein (GFP)-fusion protein localizes to the cytoplasm in a punctate pattern
933	YAR030C_04	105.465298373473	-0.0502539001327753	0.702370722362864	-0.0715489677071316	0.942960853792097	0.999400262816908	NA	NA	NA
934	YAR030C_05	268.362355693371	-0.0798681102251747	0.46131547045411	-0.173131220044613	0.862548285441225	0.999400262816908	NA	NA	NA
935	YAR030C_06	419.360773396657	-0.0459786502235288	0.396557526835037	-0.115944464830837	0.907696555470506	0.999400262816908	NA	NA	NA
936	YAR030C_07	84.2505298305168	0.0876345183096282	0.967113609307546	0.0906145022324467	0.927798908226414	0.999400262816908	NA	NA	NA
937	YAR031W_01	130.105944330092	0.516165257834532	0.615013131560309	0.839275181856693	0.401314906788044	0.999400262816908	YAR031W	PRM9	Pheromone-regulated protein; contains 3 predicted transmembrane segments and an FF sequence, a motif involved in COPII binding; member of DUP240 gene family; PRM9 has a paralog, PRM8, that arose from a segmental duplication
938	YAR031W_03	421.107571948614	-0.403279499874413	0.469794624816206	-0.858416590083771	0.390662470022403	0.999400262816908	YAR031W	PRM9	Pheromone-regulated protein; contains 3 predicted transmembrane segments and an FF sequence, a motif involved in COPII binding; member of DUP240 gene family; PRM9 has a paralog, PRM8, that arose from a segmental duplication
939	YAR031W_06	57.0185215952715	0.593246301241486	0.935062534354415	0.634445589942362	0.525790064933965	0.999400262816908	YAR031W	PRM9	Pheromone-regulated protein; contains 3 predicted transmembrane segments and an FF sequence, a motif involved in COPII binding; member of DUP240 gene family; PRM9 has a paralog, PRM8, that arose from a segmental duplication
940	YAR031W_08	237.916324826203	-0.13814075388248	0.581984323800097	-0.23736164056874	0.812376245833808	0.999400262816908	YAR031W	PRM9	Pheromone-regulated protein; contains 3 predicted transmembrane segments and an FF sequence, a motif involved in COPII binding; member of DUP240 gene family; PRM9 has a paralog, PRM8, that arose from a segmental duplication
941	YAR031W_09	91.2846480038278	-0.082801769092826	1.04836660374858	-0.0789816928512951	0.93704718455651	0.999400262816908	YAR031W	PRM9	Pheromone-regulated protein; contains 3 predicted transmembrane segments and an FF sequence, a motif involved in COPII binding; member of DUP240 gene family; PRM9 has a paralog, PRM8, that arose from a segmental duplication
942	YAR033W_01	218.373268357155	0.608612071281131	0.529924672911078	1.14848789345435	0.25076720800677	0.999400262816908	YAR033W	MST28	Putative integral membrane protein, involved in vesicle formation; forms complex with Mst27p; member of DUP240 gene family; binds COPI and COPII vesicles; MST28 has a paralog, MST27, that arose from a segmental duplication
943	YAR033W_06	196.281566258962	0.820235016781459	0.553216180689053	1.48266635252755	0.138163078544	0.999400262816908	YAR033W	MST28	Putative integral membrane protein, involved in vesicle formation; forms complex with Mst27p; member of DUP240 gene family; binds COPI and COPII vesicles; MST28 has a paralog, MST27, that arose from a segmental duplication
944	YAR033W_07	72.4108312342651	-0.966510531933927	0.873274106271372	-1.10676650663633	0.268394892635032	0.999400262816908	YAR033W	MST28	Putative integral membrane protein, involved in vesicle formation; forms complex with Mst27p; member of DUP240 gene family; binds COPI and COPII vesicles; MST28 has a paralog, MST27, that arose from a segmental duplication
945	YAR033W_08	347.118665008372	-0.406163857605823	0.40741928265602	-0.996918591967438	0.318804026457921	0.999400262816908	YAR033W	MST28	Putative integral membrane protein, involved in vesicle formation; forms complex with Mst27p; member of DUP240 gene family; binds COPI and COPII vesicles; MST28 has a paralog, MST27, that arose from a segmental duplication
946	YAR033W_09	152.819580016825	-0.278729849834029	0.709445519070106	-0.392884079667414	0.694405100631878	0.999400262816908	YAR033W	MST28	Putative integral membrane protein, involved in vesicle formation; forms complex with Mst27p; member of DUP240 gene family; binds COPI and COPII vesicles; MST28 has a paralog, MST27, that arose from a segmental duplication
947	YAR035C-A_03	284.627662742554	-0.925427731787087	0.597394170697967	-1.54910740207903	0.12135590381614	0.999400262816908	NA	NA	NA
948	YAR035C-A_04	129.984557985423	0.627306651451181	0.707119780204874	0.8871292658076	0.37500930931789	0.999400262816908	YAR035C-A		Putative protein of unknown function; identified by gene-trapping, microarray-based expression analysis, and genome-wide homology searching; predicted to have a role in cell budding based on computational "guilt by association" analysis
949	YAR035C-A_07	163.863304036622	0.142233432593347	0.706159313271646	0.201418334248651	0.84037148031758	0.999400262816908	YAR035C-A		Putative protein of unknown function; identified by gene-trapping, microarray-based expression analysis, and genome-wide homology searching; predicted to have a role in cell budding based on computational "guilt by association" analysis
950	YAR035C-A_08	235.635139595361	0.276240221854134	0.55371687011439	0.498883521098186	0.617861443777342	0.999400262816908	YAR035C-A		Putative protein of unknown function; identified by gene-trapping, microarray-based expression analysis, and genome-wide homology searching; predicted to have a role in cell budding based on computational "guilt by association" analysis
951	YAR035C-A_09	203.689093345392	0.440186130564503	0.574019770261539	0.766848379392824	0.443171668117111	0.999400262816908	YAR035C-A		Putative protein of unknown function; identified by gene-trapping, microarray-based expression analysis, and genome-wide homology searching; predicted to have a role in cell budding based on computational "guilt by association" analysis
952	YAR035W_00	89.5952631257933	0.602814942346745	0.832085438635756	0.724462794752289	0.468781660511885	0.999400262816908	YAR035W	YAT1	Outer mitochondrial carnitine acetyltransferase; minor ethanol-inducible enzyme involved in transport of activated acyl groups from the cytoplasm into the mitochondrial matrix; phosphorylated
953	YAR035W_01	145.684065634885	0.00657092446452851	0.806850064288739	0.00814392258903885	0.993502161728447	0.999761532217726	YAR035W	YAT1	Outer mitochondrial carnitine acetyltransferase; minor ethanol-inducible enzyme involved in transport of activated acyl groups from the cytoplasm into the mitochondrial matrix; phosphorylated
954	YAR035W_02	109.885332504457	0.882713050395402	0.784624036553268	1.12501403127162	0.260583088523012	0.999400262816908	YAR035W	YAT1	Outer mitochondrial carnitine acetyltransferase; minor ethanol-inducible enzyme involved in transport of activated acyl groups from the cytoplasm into the mitochondrial matrix; phosphorylated
955	YAR035W_04	41.879415075017	-0.616747234852388	1.09275797893339	-0.564395087240065	0.572485281548977	0.999400262816908	YAR035W	YAT1	Outer mitochondrial carnitine acetyltransferase; minor ethanol-inducible enzyme involved in transport of activated acyl groups from the cytoplasm into the mitochondrial matrix; phosphorylated
956	YAR035W_05	130.50277138001	-0.158724162056229	0.629695404082513	-0.252064984160867	0.800990834827933	0.999400262816908	YAR035W	YAT1	Outer mitochondrial carnitine acetyltransferase; minor ethanol-inducible enzyme involved in transport of activated acyl groups from the cytoplasm into the mitochondrial matrix; phosphorylated
957	YAR035W_06	160.382238226654	1.23857161606359	0.65969707801828	1.87748537523349	0.0604515999181821	0.919296804093424	YAR035W	YAT1	Outer mitochondrial carnitine acetyltransferase; minor ethanol-inducible enzyme involved in transport of activated acyl groups from the cytoplasm into the mitochondrial matrix; phosphorylated
958	YAR035W_07	108.999497829221	0.559058046135637	0.813082318147001	0.687578654286468	0.49171815406283	0.999400262816908	YAR035W	YAT1	Outer mitochondrial carnitine acetyltransferase; minor ethanol-inducible enzyme involved in transport of activated acyl groups from the cytoplasm into the mitochondrial matrix; phosphorylated
959	YAR035W_09	86.2993702603198	0.192379188157683	0.847913658288253	0.226885351211411	0.820512893082883	0.999400262816908	YAR035W	YAT1	Outer mitochondrial carnitine acetyltransferase; minor ethanol-inducible enzyme involved in transport of activated acyl groups from the cytoplasm into the mitochondrial matrix; phosphorylated
960	YAR042W_06	169.510801196649	-0.655647523746733	0.663995228768012	-0.987428064751659	0.323432831747684	0.999400262816908	YAR042W	SWH1	Protein similar to mammalian oxysterol-binding protein; contains ankyrin repeats and FFAT motif; interacts with ER anchor Scs2p at the nucleus-vacuole junction; regulated by sterol binding; SWH1 has a paralog, OSH2, that arose from the whole genome duplication
961	YAR042W_09	104.527042781112	0.75989905536927	0.9870164505215	0.769895025526443	0.441362164958426	0.999400262816908	YAR042W	SWH1	Protein similar to mammalian oxysterol-binding protein; contains ankyrin repeats and FFAT motif; interacts with ER anchor Scs2p at the nucleus-vacuole junction; regulated by sterol binding; SWH1 has a paralog, OSH2, that arose from the whole genome duplication
962	YAR047C_00	123.473462866753	-0.0135232652232352	0.969027097428313	-0.013955507806876	0.988865477203458	0.999761532217726	NA	NA	NA
963	YAR047C_04	77.4257120020179	-0.151985185739631	1.06720718488187	-0.14241394538255	0.886753047835045	0.999400262816908	NA	NA	NA
964	YAR047C_05	239.074331188148	-0.539312702947273	0.49643592107237	-1.08636921716358	0.277315674912417	0.999400262816908	NA	NA	NA
965	YAR047C_07	261.288866698995	0.274349783108408	0.461594066286217	0.594352924238619	0.552276087622468	0.999400262816908	NA	NA	NA
966	YAR047C_08	157.144333049208	-0.243812454126226	0.647139134807749	-0.376754303691829	0.706356202856719	0.999400262816908	NA	NA	NA
967	YAR050W_01	292.794141013724	0.13181787915693	0.469491868048877	0.280767118938058	0.778889024846236	0.999400262816908	YAR050W	FLO1	Lectin-like protein involved in flocculation; cell wall protein that binds mannose chains on the surface of other cells, confers floc-forming ability that is chymotrypsin sensitive and heat resistant; important for co-flocculation with other yeasts, mediating interaction with specific species; FLO1 has a paralog, FLO5, that arose from a segmental duplication
968	YAR050W_04	120.458712163412	-0.596270670377932	0.793188408255041	-0.751739012033328	0.452208024764344	0.999400262816908	YAR050W	FLO1	Lectin-like protein involved in flocculation; cell wall protein that binds mannose chains on the surface of other cells, confers floc-forming ability that is chymotrypsin sensitive and heat resistant; important for co-flocculation with other yeasts, mediating interaction with specific species; FLO1 has a paralog, FLO5, that arose from a segmental duplication
969	YAR050W_09	323.043674251556	-0.488490561573735	0.615020633174858	-0.794266948495777	0.427040040989331	0.999400262816908	YAR050W	FLO1	Lectin-like protein involved in flocculation; cell wall protein that binds mannose chains on the surface of other cells, confers floc-forming ability that is chymotrypsin sensitive and heat resistant; important for co-flocculation with other yeasts, mediating interaction with specific species; FLO1 has a paralog, FLO5, that arose from a segmental duplication
970	YAR053W_01	181.614510098071	0.188056599473303	0.55605941241868	0.338195155541595	0.735216126323906	0.999400262816908	NA	NA	NA
971	YAR053W_02	84.8786936881682	0.29251349856559	0.775126717033089	0.377375069311542	0.705894891443632	0.999400262816908	NA	NA	NA
972	YAR053W_05	57.9605246414989	-0.80100597908261	1.10017146990962	-0.728073760309761	0.466568435376121	0.999400262816908	NA	NA	NA
973	YAR053W_06	380.375478917103	0.14409950453183	0.386066269455199	0.373250697957056	0.708961866546567	0.999400262816908	NA	NA	NA
974	YAR060C_00	195.261515413762	-0.219905792213568	0.63989121043134	-0.34366121713929	0.731101080829932	0.999400262816908	NA	NA	NA
975	YAR060C_01	392.467157887907	-0.0164391112320464	0.414053195166221	-0.039702896690477	0.968329992274478	0.999400262816908	NA	NA	NA
976	YAR060C_02	131.49922504007	0.153938654793739	0.711135803996824	0.216468716563773	0.82862240763538	0.999400262816908	NA	NA	NA
977	YAR060C_03	288.347018835572	0.267721359441121	0.487368494653235	0.549320200994128	0.582785726500988	0.999400262816908	NA	NA	NA
978	YAR060C_04	241.872276522122	-0.140463043911897	0.482499914924931	-0.29111516824568	0.770963239510342	0.999400262816908	NA	NA	NA
979	YAR060C_05	357.697262853967	0.571811366825148	0.397867565054522	1.43719020359649	0.150663955814785	0.999400262816908	NA	NA	NA
980	YAR060C_06	136.043170251431	0.436537038038396	0.663544932494416	0.657886175691756	0.510611274430183	0.999400262816908	NA	NA	NA
981	YAR060C_08	358.057624296548	1.00282904897144	0.396364084380526	2.53007042890568	0.0114039633035579	0.560901728572064	NA	NA	NA
982	YAR060C_09	261.541058171417	0.305451551432736	0.468222503178599	0.652364099032259	0.514166318448547	0.999400262816908	NA	NA	NA
983	YAR064W_00	53.5462976353568	-0.364088815808132	0.981973356515745	-0.370772601305598	0.710806910092647	0.999400262816908	YAR064W		Pseudogenic fragment with similarity to flocculins; YAR064W has a paralog, YHR213W-B, that arose from a segmental duplication
984	YAR064W_01	70.3556203627011	-0.186324051212362	0.930511022503891	-0.200238413845961	0.841294125583743	0.999400262816908	YAR064W		Pseudogenic fragment with similarity to flocculins; YAR064W has a paralog, YHR213W-B, that arose from a segmental duplication
985	YAR064W_07	303.63253804305	-0.165087810405354	0.476046431914242	-0.346789303181027	0.728749613856599	0.999400262816908	YAR064W		Pseudogenic fragment with similarity to flocculins; YAR064W has a paralog, YHR213W-B, that arose from a segmental duplication
986	YAR064W_08	127.988992654433	0.230147910229782	0.644220104178003	0.357250431548454	0.720904334567734	0.999400262816908	NA	NA	NA
987	YAR064W_09	298.717630562151	0.188363647551864	0.440647674465313	0.427469968564855	0.669037054379152	0.999400262816908	NA	NA	NA
988	YAR066W_00	192.748651320832	0.21470675450908	0.645168812467745	0.332791589363774	0.739291607440342	0.999400262816908	NA	NA	NA
989	YAR066W_02	41.4293439459507	-1.64822305652722	1.11716595284143	-1.475360981361	0.140115519629249	0.999400262816908	NA	NA	NA
990	YAR066W_03	165.967792300184	0.721764237796467	0.584587796613363	1.23465498591964	0.216958935475451	0.999400262816908	NA	NA	NA
991	YAR066W_04	96.4454477076879	0.189555166913939	0.716635856884109	0.264506952998576	0.791389307828539	0.999400262816908	NA	NA	NA
992	YAR066W_05	192.521056435306	0.266735894760804	0.603379021382165	0.442070216743351	0.658438395686484	0.999400262816908	NA	NA	NA
993	YAR066W_06	110.488766680939	0.508828112308084	0.672080574569711	0.757093913380628	0.448993600337759	0.999400262816908	NA	NA	NA
994	YAR066W_09	253.617786299275	-0.56369337114484	0.579126171644058	-0.973351574743365	0.330378597695722	0.999400262816908	NA	NA	NA
995	YAR068W_01	194.428026949867	-0.529463813252656	0.573340937872191	-0.923471146535648	0.355761730048684	0.999400262816908	NA	NA	NA
996	YAR068W_04	448.885985631947	0.142315087599546	0.372099195649826	0.382465453468692	0.702116148795031	0.999400262816908	YAR068W		Fungal-specific protein of unknown function; induced in respiratory-deficient cells; YAR068W has a paralog, YHR214W-A, that arose from a segmental duplication
997	YAR068W_05	361.118801702635	0.346126746970111	0.435421675211221	0.794923097942257	0.426658237292823	0.999400262816908	YAR068W		Fungal-specific protein of unknown function; induced in respiratory-deficient cells; YAR068W has a paralog, YHR214W-A, that arose from a segmental duplication
998	YAR068W_06	215.662981044236	0.0370981624036888	0.540519253970692	0.068634303276272	0.945280713171603	0.999400262816908	YAR068W		Fungal-specific protein of unknown function; induced in respiratory-deficient cells; YAR068W has a paralog, YHR214W-A, that arose from a segmental duplication
999	YAR068W_08	636.152101842863	0.515638053874642	0.410124466899848	1.25727211003132	0.208655119517776	0.999400262816908	YAR068W		Fungal-specific protein of unknown function; induced in respiratory-deficient cells; YAR068W has a paralog, YHR214W-A, that arose from a segmental duplication
1000	YAR068W_09	325.679399404821	0.676493364627019	0.453321466083087	1.49230384008118	0.135619510513421	0.999400262816908	NA	NA	NA
1001	YAR069C_00	61.4369845255084	0.70305077527203	0.933771039626563	0.752915592191847	0.451500637851348	0.999400262816908	NA	NA	NA
1002	YAR069C_01	152.827160998715	0.236854355186996	0.567610525820202	0.417283232802526	0.67647125127326	0.999400262816908	NA	NA	NA
1003	YAR069C_02	452.511261802779	0.144872907368005	0.4232213516254	0.342310015342124	0.73211759920459	0.999400262816908	NA	NA	NA
1004	YAR069C_03	355.809592545653	0.328837470576518	0.418962094671108	0.784885971210979	0.432520427991583	0.999400262816908	NA	NA	NA
1005	YAR069C_04	731.615277097115	0.319688166271862	0.326519692288811	0.979077751883627	0.327541563551657	0.999400262816908	NA	NA	NA
1006	YAR069C_05	247.469137102522	-0.805070573815324	0.535108156095767	-1.50450065962224	0.132452503636999	0.999400262816908	NA	NA	NA
1007	YAR069C_06	180.98937702775	-0.517405287212718	0.5844088184772	-0.885348185814386	0.375968868771347	0.999400262816908	NA	NA	NA
1008	YAR069C_07	152.698415755574	-0.0741135550721593	0.64309563942296	-0.115244997056208	0.908250933756385	0.999400262816908	NA	NA	NA
1009	YAR069C_08	162.604135736463	-0.398542326884926	0.606310090950758	-0.657324251786689	0.510972445878548	0.999400262816908	NA	NA	NA
1010	YAR069C_09	314.258139975861	0.227276537556762	0.430421108819917	0.52803297259255	0.597476450877583	0.999400262816908	NA	NA	NA
1011	YAR070C_00	560.201036367359	-0.941661296467032	0.380345668106128	-2.47580392109075	0.0132936564061494	0.593644342769181	NA	NA	NA
1012	YAR070C_02	576.423974251142	-0.181474257614679	0.363730799390708	-0.498924638547712	0.617832475869215	0.999400262816908	NA	NA	NA
1013	YAR070C_03	94.528114208535	0.253085542729354	0.710888440859183	0.356013022835866	0.721830812494728	0.999400262816908	NA	NA	NA
1014	YAR070C_04	189.873465473751	0.130179414855705	0.535425055157431	0.243132841098422	0.80790249086275	0.999400262816908	NA	NA	NA
1015	YAR070C_06	214.721406927778	0.401357663179247	0.658960912973256	0.609076585997045	0.542473676337734	0.999400262816908	NA	NA	NA
1016	YAR070C_09	319.402227028507	-0.650099470047781	0.434438009223118	-1.49641480774281	0.134545593136621	0.999400262816908	NA	NA	NA
1017	YAR071W_01	163.389116325773	-0.00351975070131577	0.641016039660014	-0.0054908933373689	0.995618922995955	0.999761532217726	NA	NA	NA
1018	YAR071W_02	159.632694834078	0.0331799241692806	0.71266097231992	0.0465577960039965	0.962865669439189	0.999400262816908	NA	NA	NA
1019	YAR071W_03	310.369362096277	-0.103922441808026	0.460055097660956	-0.225891295056606	0.821285968393842	0.999400262816908	NA	NA	NA
1020	YAR071W_04	230.867923376363	0.580356819254377	0.555159540880478	1.04538745444947	0.295843932614409	0.999400262816908	YAR071W	PHO11	One of three repressible acid phosphatases; glycoprotein that is transported to the cell surface by the secretory pathway; induced by phosphate starvation and coordinately regulated by PHO4 and PHO2; PHO11 has a paralog, PHO12, that arose from a segmental duplication
1021	YAR071W_05	212.084772847302	-0.0865717204474073	0.556115247812356	-0.155672265394561	0.876291359618851	0.999400262816908	YAR071W	PHO11	One of three repressible acid phosphatases; glycoprotein that is transported to the cell surface by the secretory pathway; induced by phosphate starvation and coordinately regulated by PHO4 and PHO2; PHO11 has a paralog, PHO12, that arose from a segmental duplication
1022	YAR071W_07	120.636851799775	0.158212242340185	0.745787516614313	0.212141178037451	0.831996895295393	0.999400262816908	NA	NA	NA
1023	YAR071W_08	204.221529572041	-0.0552834776705042	0.549900789687175	-0.100533548427806	0.919920749950802	0.999400262816908	NA	NA	NA
1024	YAR071W_09	101.325440825514	1.0180364337645	0.805540689213264	1.26379268905556	0.206304445965791	0.999400262816908	NA	NA	NA
1025	YAR073W_00	227.32363736555	1.44363734754632	0.549097566329594	2.6291089891296	0.00856089188320803	0.480778117653346	NA	NA	NA
1026	YAR073W_04	250.131147133109	-0.648846357787176	0.494173111101646	-1.31299405655787	0.189184950913837	0.999400262816908	NA	NA	NA
1027	YAR073W_09	124.331809777742	0.0475228782091274	0.715922825149865	0.0663798897586193	0.947075380532993	0.999400262816908	NA	NA	NA
1028	YAR075W_01	91.9800252205409	-1.34124098231826	0.722047155516823	-1.85755316958244	0.0632324940537597	0.926963681967007	NA	NA	NA
1029	YAR075W_03	197.858751008956	0.312510490565571	0.531227081496551	0.588280419900996	0.556344085843936	0.999400262816908	NA	NA	NA
1030	YAR075W_04	73.8394014379197	0.169099289498883	0.910779687285002	0.185664318011924	0.852708011840271	0.999400262816908	NA	NA	NA
1031	YAR075W_05	49.0994528479567	0.440115586905552	0.959472507997094	0.458705781809524	0.646445461507298	0.999400262816908	NA	NA	NA
1032	YAR075W_07	70.5310291022666	0.638158625014195	0.845866222048093	0.754443916047413	0.450582709890005	0.999400262816908	NA	NA	NA
1033	YAR075W_09	71.8718567079416	-0.807810879926163	0.845683986771572	-0.955216005697364	0.339468473292315	0.999400262816908	NA	NA	NA
1034	YBL001C_00	248.792072195781	-0.0686182206057046	0.460316311744366	-0.149067540851803	0.88150033832584	0.999400262816908	YBL001C	ECM15	Non-essential protein of unknown function; likely exists as tetramer, may be regulated by the binding of small-molecule ligands (possibly sulfate ions), may have a role in yeast cell-wall biogenesis
1035	YBL001C_01	169.667635310389	-0.0685050918745146	0.557917496092083	-0.122787136726051	0.902275660582302	0.999400262816908	YBL001C	ECM15	Non-essential protein of unknown function; likely exists as tetramer, may be regulated by the binding of small-molecule ligands (possibly sulfate ions), may have a role in yeast cell-wall biogenesis
1036	YBL001C_02	91.8685842059743	1.6424963139488	0.723198257479045	2.27115634884725	0.0231375148454172	0.722125331434215	YBL001C	ECM15	Non-essential protein of unknown function; likely exists as tetramer, may be regulated by the binding of small-molecule ligands (possibly sulfate ions), may have a role in yeast cell-wall biogenesis
1037	YBL001C_03	119.666356520065	-0.628596453078934	0.692046610418075	-0.908315196716577	0.363711715799635	0.999400262816908	YBL001C	ECM15	Non-essential protein of unknown function; likely exists as tetramer, may be regulated by the binding of small-molecule ligands (possibly sulfate ions), may have a role in yeast cell-wall biogenesis
1038	YBL001C_07	153.174248580284	0.174260674230526	0.615319374869441	0.283203619693433	0.777020753781763	0.999400262816908	YBL001C	ECM15	Non-essential protein of unknown function; likely exists as tetramer, may be regulated by the binding of small-molecule ligands (possibly sulfate ions), may have a role in yeast cell-wall biogenesis
1039	YBL001C_08	127.613283266054	0.855335803576908	0.714958669103394	1.19634300630211	0.23156273255011	0.999400262816908	YBL001C	ECM15	Non-essential protein of unknown function; likely exists as tetramer, may be regulated by the binding of small-molecule ligands (possibly sulfate ions), may have a role in yeast cell-wall biogenesis
1040	YBL001C_09	76.6868952537247	-0.549961199964933	0.859074130809695	-0.640178979020801	0.522056247398882	0.999400262816908	YBL001C	ECM15	Non-essential protein of unknown function; likely exists as tetramer, may be regulated by the binding of small-molecule ligands (possibly sulfate ions), may have a role in yeast cell-wall biogenesis
1041	YBL002W_00	83.0373004236513	-0.50517878030732	0.851709753902468	-0.59313490070136	0.553090875220311	0.999400262816908	YBL002W	HTB2	Histone H2B; core histone protein required for chromatin assembly and chromosome function; nearly identical to HTB1; Rad6p-Bre1p-Lge1p mediated ubiquitination regulates reassembly after DNA replication, transcriptional activation, meiotic DSB formation and H3 methylation
1042	YBL002W_01	314.449928310661	0.720517413663871	0.453749513348918	1.58791886815715	0.112304686316031	0.999400262816908	YBL002W	HTB2	Histone H2B; core histone protein required for chromatin assembly and chromosome function; nearly identical to HTB1; Rad6p-Bre1p-Lge1p mediated ubiquitination regulates reassembly after DNA replication, transcriptional activation, meiotic DSB formation and H3 methylation
1043	YBL002W_03	46.2421059539465	0.369408587189605	1.10725517799383	0.333625522401182	0.738662156598902	0.999400262816908	YBL002W	HTB2	Histone H2B; core histone protein required for chromatin assembly and chromosome function; nearly identical to HTB1; Rad6p-Bre1p-Lge1p mediated ubiquitination regulates reassembly after DNA replication, transcriptional activation, meiotic DSB formation and H3 methylation
1044	YBL002W_04	181.687988729382	-0.679099627155687	0.585375624352511	-1.16010916564359	0.246004362913564	0.999400262816908	YBL002W	HTB2	Histone H2B; core histone protein required for chromatin assembly and chromosome function; nearly identical to HTB1; Rad6p-Bre1p-Lge1p mediated ubiquitination regulates reassembly after DNA replication, transcriptional activation, meiotic DSB formation and H3 methylation
1045	YBL002W_07	107.628192060746	0.086459984647714	0.815911170001694	0.105967399180887	0.915608218198171	0.999400262816908	YBL002W	HTB2	Histone H2B; core histone protein required for chromatin assembly and chromosome function; nearly identical to HTB1; Rad6p-Bre1p-Lge1p mediated ubiquitination regulates reassembly after DNA replication, transcriptional activation, meiotic DSB formation and H3 methylation
1046	YBL003C_01	88.3274062024871	0.241694390945905	0.776040207441196	0.311445706844023	0.75546181137202	0.999400262816908	YBL003C	HTA2	Histone H2A; core histone protein required for chromatin assembly and chromosome function; one of two nearly identical (see also HTA1) subtypes; DNA damage-dependent phosphorylation by Mec1p facilitates DNA repair; acetylated by Nat4p
1047	YBL003C_02	211.569686876809	0.221210196788041	0.531014076270061	0.416580664568935	0.676985154530166	0.999400262816908	YBL003C	HTA2	Histone H2A; core histone protein required for chromatin assembly and chromosome function; one of two nearly identical (see also HTA1) subtypes; DNA damage-dependent phosphorylation by Mec1p facilitates DNA repair; acetylated by Nat4p
1048	YBL003C_03	98.4457891519444	0.5227743188474	0.700273034239385	0.746529272564695	0.455347755420786	0.999400262816908	YBL003C	HTA2	Histone H2A; core histone protein required for chromatin assembly and chromosome function; one of two nearly identical (see also HTA1) subtypes; DNA damage-dependent phosphorylation by Mec1p facilitates DNA repair; acetylated by Nat4p
1049	YBL003C_06	55.379782075861	-0.187576046215827	1.0571300891493	-0.177438943552137	0.859163620073652	0.999400262816908	YBL003C	HTA2	Histone H2A; core histone protein required for chromatin assembly and chromosome function; one of two nearly identical (see also HTA1) subtypes; DNA damage-dependent phosphorylation by Mec1p facilitates DNA repair; acetylated by Nat4p
1050	YBL004W_01	50.4232796884002	-0.71506851568296	1.04632479169274	-0.683409703526305	0.494347990141375	0.999400262816908	YBL004W	UTP20	Component of the small-subunit (SSU) processome; SSU processome is involved in the biogenesis of the 18S rRNA
1051	YBL004W_04	88.1941443214258	0.183838772088439	0.803914539489546	0.228679496461364	0.819118031999452	0.999400262816908	YBL004W	UTP20	Component of the small-subunit (SSU) processome; SSU processome is involved in the biogenesis of the 18S rRNA
1052	YBL004W_06	52.9946857953143	-1.34107774962706	1.09985074829676	-1.21932703296685	0.222720092224819	0.999400262816908	YBL004W	UTP20	Component of the small-subunit (SSU) processome; SSU processome is involved in the biogenesis of the 18S rRNA
1053	YBL004W_09	119.535230646426	-0.123189138166047	0.72799737900099	-0.169216458354694	0.865626384576089	0.999400262816908	YBL004W	UTP20	Component of the small-subunit (SSU) processome; SSU processome is involved in the biogenesis of the 18S rRNA
1054	YBL005W_00	153.50777366461	0.842242594759844	0.597945942509262	1.40855976248521	0.15896538388066	0.999400262816908	NA	NA	NA
1055	YBL005W_01	725.284737481006	0.69788091335389	0.332574835123646	2.09841767821798	0.0358682649872403	0.82099387767431	YBL005W	PDR3	Transcriptional activator of the pleiotropic drug resistance network; regulates expression of ATP-binding cassette (ABC) transporters through binding to cis-acting PDRE sites (PDR responsive elements); has a role in response to drugs and organic solvents; post-translationally up-regulated in cells lacking functional mitochondrial genome; involved in diauxic shift; relative distribution to nucleus…
1056	YBL005W_02	110.908155981538	0.0246249182750763	0.700604860436088	0.0351480836997743	0.971961659830143	0.999400262816908	YBL005W	PDR3	Transcriptional activator of the pleiotropic drug resistance network; regulates expression of ATP-binding cassette (ABC) transporters through binding to cis-acting PDRE sites (PDR responsive elements); has a role in response to drugs and organic solvents; post-translationally up-regulated in cells lacking functional mitochondrial genome; involved in diauxic shift; relative distribution to nucleus…
1057	YBL005W_03	230.19707091058	-0.20676938682646	0.663145730550652	-0.311800826425839	0.755191895939946	0.999400262816908	YBL005W	PDR3	Transcriptional activator of the pleiotropic drug resistance network; regulates expression of ATP-binding cassette (ABC) transporters through binding to cis-acting PDRE sites (PDR responsive elements); has a role in response to drugs and organic solvents; post-translationally up-regulated in cells lacking functional mitochondrial genome; involved in diauxic shift; relative distribution to nucleus…
1058	YBL005W_07	94.0499693241179	-1.70962822113672	0.923735575350831	-1.85077663647133	0.0642016935584093	0.930583788218221	YBL005W	PDR3	Transcriptional activator of the pleiotropic drug resistance network; regulates expression of ATP-binding cassette (ABC) transporters through binding to cis-acting PDRE sites (PDR responsive elements); has a role in response to drugs and organic solvents; post-translationally up-regulated in cells lacking functional mitochondrial genome; involved in diauxic shift; relative distribution to nucleus…
1059	YBL005W_08	343.156255051389	0.116255134456906	0.411987622736273	0.282181133706836	0.77780462386788	0.999400262816908	YBL005W	PDR3	Transcriptional activator of the pleiotropic drug resistance network; regulates expression of ATP-binding cassette (ABC) transporters through binding to cis-acting PDRE sites (PDR responsive elements); has a role in response to drugs and organic solvents; post-translationally up-regulated in cells lacking functional mitochondrial genome; involved in diauxic shift; relative distribution to nucleus…
1060	YBL005W_09	640.11768626469	0.599479628494136	0.350677392623078	1.70949037806518	0.0873601525230137	0.9768306752966	NA	NA	NA
1061	YBL005W-A_00	286.21212886959	0.136613931851591	0.50053221181703	0.272937342744946	0.784901380552772	0.999400262816908	YBL005W-A		Retrotransposon TYA Gag gene co-transcribed with TYB Pol; translated as TYA or TYA-TYB polyprotein; Gag is a nucleocapsid protein that is the structural constituent of virus-like particles (VLPs); similar to retroviral Gag
1062	YBL005W-A_01	3666.94056359108	-0.0613713492967329	0.237853559591068	-0.258021571769815	0.79639025890358	0.999400262816908	NA	NA	NA
1063	YBL005W-A_02	3213.62635319383	-0.315462118032863	0.255622754496613	-1.23409247605554	0.21716844685813	0.999400262816908	NA	NA	NA
1064	YBL005W-A_03	332.750160966347	0.122821978085893	0.429761335095263	0.285791131160432	0.775038101265343	0.999400262816908	YBL005W-A		Retrotransposon TYA Gag gene co-transcribed with TYB Pol; translated as TYA or TYA-TYB polyprotein; Gag is a nucleocapsid protein that is the structural constituent of virus-like particles (VLPs); similar to retroviral Gag
1065	YBL005W-A_04	390.53854438854	0.0934837737412115	0.466551599714397	0.200371778380866	0.841189829498912	0.999400262816908	YBL005W-A		Retrotransposon TYA Gag gene co-transcribed with TYB Pol; translated as TYA or TYA-TYB polyprotein; Gag is a nucleocapsid protein that is the structural constituent of virus-like particles (VLPs); similar to retroviral Gag
1066	YBL005W-A_05	436.409140343507	-0.32419030759755	0.402550350276961	-0.805341014793556	0.420622919783204	0.999400262816908	NA	NA	NA
1067	YBL005W-A_06	5472.4017622429	-0.285924356963549	0.224821027675906	-1.27178654025071	0.203448972529777	0.999400262816908	NA	NA	NA
1068	YBL005W-A_07	557.948052127197	0.0599961930655454	0.352571573877077	0.170167414252355	0.864878477589391	0.999400262816908	NA	NA	NA
1069	YBL005W-A_08	1019.29996826345	0.0651204373436541	0.299927295642482	0.217120743225981	0.828114248779527	0.999400262816908	NA	NA	NA
1070	YBL005W-A_09	5076.89159292517	-0.0680895218702923	0.236037041474197	-0.288469646310728	0.772987262146669	0.999400262816908	NA	NA	NA
1071	YBL006C_01	52.8983668906293	-2.0393376578184	0.992258785865492	-2.0552477709125	0.0398550791808918	0.842143282692132	YBL005W	PDR3	Transcriptional activator of the pleiotropic drug resistance network; regulates expression of ATP-binding cassette (ABC) transporters through binding to cis-acting PDRE sites (PDR responsive elements); has a role in response to drugs and organic solvents; post-translationally up-regulated in cells lacking functional mitochondrial genome; involved in diauxic shift; relative distribution to nucleus…
1072	YBL006C_02	183.870674656766	0.29910218431398	0.535558226983681	0.55848676996067	0.576512036223094	0.999400262816908	YBL006C	LDB7	Component of the RSC chromatin remodeling complex; interacts with Rsc3p, Rsc30p, Npl6p, and Htl1p to form a module important for a broad range of RSC functions
1073	YBL006C_04	75.4398123026534	0.104619403665482	0.774800130190926	0.135027602072939	0.892590050879475	0.999400262816908	YBL006C	LDB7	Component of the RSC chromatin remodeling complex; interacts with Rsc3p, Rsc30p, Npl6p, and Htl1p to form a module important for a broad range of RSC functions
1074	YBL006C_05	414.330621306767	-0.672374745615725	0.40675953323589	-1.65300304154346	0.0983302445580022	0.999227464599847	YBL006C	LDB7	Component of the RSC chromatin remodeling complex; interacts with Rsc3p, Rsc30p, Npl6p, and Htl1p to form a module important for a broad range of RSC functions
1075	YBL006W-A_00	466.715428642	-0.265107901725033	0.400577978443924	-0.661813469514389	0.508090772691741	0.999400262816908	NA	NA	NA
1076	YBL006W-A_01	327.161814822745	0.613623298288812	0.432916128333465	1.41741842848634	0.156360627885483	0.999400262816908	YBL007C	SLA1	Cytoskeletal protein binding protein; required for assembly of the cortical actin cytoskeleton; interacts with proteins regulating actin dynamics and proteins required for endocytosis; found in the nucleus and cell cortex; has 3 SH3 domains
1077	YBL006W-A_02	118.07661669394	0.390078441965647	0.763391856507986	0.510980617149885	0.609364629219774	0.999400262816908	NA	NA	NA
1078	YBL006W-A_03	252.261288969238	-0.22287444845403	0.4786269850291	-0.465653745871598	0.64146336556475	0.999400262816908	NA	NA	NA
1079	YBL006W-A_05	49.9379899938083	0.986228997714222	0.94214878173493	1.04678689484491	0.295197875970037	0.999400262816908	NA	NA	NA
1080	YBL006W-A_06	243.511773458987	-0.0690439757729578	0.559088482801097	-0.12349382592723	0.901716063065829	0.999400262816908	NA	NA	NA
1081	YBL006W-A_08	186.723753870597	0.111609471863103	0.619411271151183	0.180186375452411	0.857006254187795	0.999400262816908	NA	NA	NA
1082	YBL006W-A_09	161.13225450461	-0.68983953831973	0.653438836584862	-1.05570636408009	0.291102388707463	0.999400262816908	NA	NA	NA
1083	YBL007C_00	125.072913442002	0.159467674404777	0.673428201470684	0.23679981630784	0.812812094068424	0.999400262816908	YBL007C	SLA1	Cytoskeletal protein binding protein; required for assembly of the cortical actin cytoskeleton; interacts with proteins regulating actin dynamics and proteins required for endocytosis; found in the nucleus and cell cortex; has 3 SH3 domains
1084	YBL007C_01	408.199582321513	-0.322131261301795	0.442347385066743	-0.728231413085422	0.466471939473802	0.999400262816908	YBL007C	SLA1	Cytoskeletal protein binding protein; required for assembly of the cortical actin cytoskeleton; interacts with proteins regulating actin dynamics and proteins required for endocytosis; found in the nucleus and cell cortex; has 3 SH3 domains
1085	YBL007C_02	148.923481761742	-0.282552886263312	0.649785413268599	-0.434840303419545	0.663678348159293	0.999400262816908	YBL007C	SLA1	Cytoskeletal protein binding protein; required for assembly of the cortical actin cytoskeleton; interacts with proteins regulating actin dynamics and proteins required for endocytosis; found in the nucleus and cell cortex; has 3 SH3 domains
1086	YBL007C_03	234.359344587682	0.282424827963222	0.599206739990938	0.471331193583526	0.637404243186568	0.999400262816908	YBL007C	SLA1	Cytoskeletal protein binding protein; required for assembly of the cortical actin cytoskeleton; interacts with proteins regulating actin dynamics and proteins required for endocytosis; found in the nucleus and cell cortex; has 3 SH3 domains
1087	YBL007C_04	89.4509255727724	0.923270448485672	0.8564225004203	1.07805487131943	0.281009269488828	0.999400262816908	YBL007C	SLA1	Cytoskeletal protein binding protein; required for assembly of the cortical actin cytoskeleton; interacts with proteins regulating actin dynamics and proteins required for endocytosis; found in the nucleus and cell cortex; has 3 SH3 domains
1088	YBL007C_06	279.466301846362	0.0213439061892616	0.482464022018842	0.0442393737463558	0.964713597050476	0.999400262816908	YBL007C	SLA1	Cytoskeletal protein binding protein; required for assembly of the cortical actin cytoskeleton; interacts with proteins regulating actin dynamics and proteins required for endocytosis; found in the nucleus and cell cortex; has 3 SH3 domains
1089	YBL007C_08	191.624309036715	-0.26062783723506	0.563119195926198	-0.462828898607139	0.643487015301218	0.999400262816908	YBL007C	SLA1	Cytoskeletal protein binding protein; required for assembly of the cortical actin cytoskeleton; interacts with proteins regulating actin dynamics and proteins required for endocytosis; found in the nucleus and cell cortex; has 3 SH3 domains
1090	YBL008W_00	250.513464473199	0.263409028515443	0.457668757452711	0.575545138762636	0.56492267203864	0.999400262816908	YBL008W-A		Putative protein of unknown function; identified by fungal homology and RT-PCR
1091	YBL008W_03	150.578159615618	0.0721515871269175	0.655578605279268	0.110057873374592	0.912363477312481	0.999400262816908	YBL008W	HIR1	Subunit of the HIR complex; HIR is a nucleosome assembly complex involved in regulation of histone gene transcription; contributes to nucleosome formation, heterochromatic gene silencing, and formation of functional kinetochores
1092	YBL008W_04	1240.86772712233	-1.48013154753546	0.479503224839837	-3.0868020711015	0.00202322264062393	0.215116131684283	YBL008W	HIR1	Subunit of the HIR complex; HIR is a nucleosome assembly complex involved in regulation of histone gene transcription; contributes to nucleosome formation, heterochromatic gene silencing, and formation of functional kinetochores
1093	YBL008W_09	128.243121749247	-1.66834181252841	0.819065583890928	-2.03688428050295	0.0416616397563105	0.854467536719454	YBL008W	HIR1	Subunit of the HIR complex; HIR is a nucleosome assembly complex involved in regulation of histone gene transcription; contributes to nucleosome formation, heterochromatic gene silencing, and formation of functional kinetochores
1094	YBL008W-A_00	122.439120518571	-1.54308312927542	0.699187428953781	-2.2069663517612	0.0273164102040747	0.761418631106665	YBL008W-A		Putative protein of unknown function; identified by fungal homology and RT-PCR
1095	YBL008W-A_01	94.5620198597766	0.539437914487342	0.754169157136311	0.715274430653815	0.474439485012126	0.999400262816908	YBL008W-A		Putative protein of unknown function; identified by fungal homology and RT-PCR
1096	YBL008W-A_03	488.214490246688	-0.216176807670622	0.357263477928986	-0.605090699233442	0.545118733741036	0.999400262816908	YBL008W-A		Putative protein of unknown function; identified by fungal homology and RT-PCR
1097	YBL008W-A_06	233.844923763835	-0.150182954182891	0.588388454316318	-0.255244563487224	0.798534213942599	0.999400262816908	YBL008W-A		Putative protein of unknown function; identified by fungal homology and RT-PCR
1098	YBL008W-A_07	346.25371510137	-0.0981701428318932	0.443985247399898	-0.221111272067721	0.825005793627162	0.999400262816908	YBL008W-A		Putative protein of unknown function; identified by fungal homology and RT-PCR
1099	YBL008W-A_08	280.542811132336	-0.342595305371339	0.496002731068438	-0.690712538282512	0.489746208334581	0.999400262816908	YBL008W-A		Putative protein of unknown function; identified by fungal homology and RT-PCR
1100	YBL008W-A_09	125.050898048917	-0.194095256519026	0.779785755850003	-0.248908440636303	0.803431606062985	0.999400262816908	YBL008W-A		Putative protein of unknown function; identified by fungal homology and RT-PCR
1101	YBL009W_00	403.433227355587	-0.346227385185209	0.418867412079069	-0.826579903809399	0.408475211675349	0.999400262816908	NA	NA	NA
1102	YBL009W_02	174.45016080253	-0.665903665467475	0.707998314651717	-0.940544139282381	0.34693851984833	0.999400262816908	YBL009W	ALK2	Protein kinase; along with its paralog, ALK1, required for proper spindle positioning and nuclear segregation following mitotic arrest, proper organization of cell polarity factors in mitosis, proper localization of formins and polarity factors, and survival in cells that activate spindle assembly checkpoint; phosphorylated in response to DNA damage; ALK2 has a paralog, ALK1, that arose from the …
1103	YBL009W_03	232.746850777049	-0.0669848785940514	0.562553367877171	-0.119072931421285	0.905217575742781	0.999400262816908	YBL009W	ALK2	Protein kinase; along with its paralog, ALK1, required for proper spindle positioning and nuclear segregation following mitotic arrest, proper organization of cell polarity factors in mitosis, proper localization of formins and polarity factors, and survival in cells that activate spindle assembly checkpoint; phosphorylated in response to DNA damage; ALK2 has a paralog, ALK1, that arose from the …
1104	YBL009W_05	104.570220927162	0.590878657358029	0.767659607264659	0.769714404361408	0.441469323648891	0.999400262816908	NA	NA	NA
1105	YBL011W_00	192.641711053805	-0.157659714422433	0.587791797508891	-0.268223740260765	0.788527102219508	0.999400262816908	YBL011W	SCT1	Glycerol 3-phosphate/dihydroxyacetone phosphate sn-1 acyltransferase; dual substrate-specific acyltransferase of the glycerolipid biosynthesis pathway; prefers 16-carbon fatty acids; similar to Gpt2p; gene is constitutively transcribed
1106	YBL011W_02	142.191953764011	0.433598129933169	0.591792213265133	0.732686439959814	0.463749696309266	0.999400262816908	YBL011W	SCT1	Glycerol 3-phosphate/dihydroxyacetone phosphate sn-1 acyltransferase; dual substrate-specific acyltransferase of the glycerolipid biosynthesis pathway; prefers 16-carbon fatty acids; similar to Gpt2p; gene is constitutively transcribed
1107	YBL011W_04	82.9646368994091	0.0818852415562843	0.766464709067191	0.106834979598657	0.914919896565583	0.999400262816908	YBL011W	SCT1	Glycerol 3-phosphate/dihydroxyacetone phosphate sn-1 acyltransferase; dual substrate-specific acyltransferase of the glycerolipid biosynthesis pathway; prefers 16-carbon fatty acids; similar to Gpt2p; gene is constitutively transcribed
1108	YBL011W_09	78.8465807377206	0.868910934225426	0.913365019281956	0.95132933261285	0.341437221163971	0.999400262816908	YBL011W	SCT1	Glycerol 3-phosphate/dihydroxyacetone phosphate sn-1 acyltransferase; dual substrate-specific acyltransferase of the glycerolipid biosynthesis pathway; prefers 16-carbon fatty acids; similar to Gpt2p; gene is constitutively transcribed
1109	YBL012C_01	165.199980201528	0.639398010126739	0.588050116165597	1.08731890794607	0.276895895197453	0.999400262816908	NA	NA	NA
1110	YBL012C_02	82.8013261674167	0.877803531868773	0.921210141545105	0.952880881659066	0.340650427789223	0.999400262816908	NA	NA	NA
1111	YBL012C_05	244.299914473208	-0.196357096280871	0.536739578422542	-0.365833085866255	0.714489629738871	0.999400262816908	NA	NA	NA
1112	YBL012C_07	70.5398146371906	0.101306168976735	1.03267599808025	0.0981006328849156	0.921852384982495	0.999400262816908	NA	NA	NA
1113	YBL012C_08	80.0217720570466	-0.843129377362024	0.91562809915397	-0.920820776624337	0.35714400579958	0.999400262816908	NA	NA	NA
1114	YBL012C_09	192.187568901899	-0.0662162480366469	0.577430675208621	-0.114673935555508	0.908703574026977	0.999400262816908	NA	NA	NA
1115	YBL013W_00	182.312649333979	0.0833335879685433	0.547894170750757	0.152097964200558	0.879109669860301	0.999400262816908	YBL013W	FMT1	Methionyl-tRNA formyltransferase; catalyzes the formylation of initiator Met-tRNA in mitochondria; potential Cdc28p substrate
1116	YBL013W_01	195.681934032905	1.40853907138954	0.53379826198661	2.63871048614405	0.00832220191505117	0.475638814136049	NA	NA	NA
1117	YBL013W_02	29.1968174372989	-0.839792998589979	1.26730518906802	-0.662660427680856	0.507548059468882	0.999400262816908	YBL013W	FMT1	Methionyl-tRNA formyltransferase; catalyzes the formylation of initiator Met-tRNA in mitochondria; potential Cdc28p substrate
1118	YBL013W_06	174.876993537217	0.274254381667374	0.550022734849733	0.498623719149174	0.618044492189402	0.999400262816908	YBL013W	FMT1	Methionyl-tRNA formyltransferase; catalyzes the formylation of initiator Met-tRNA in mitochondria; potential Cdc28p substrate
1119	YBL013W_07	169.188705074667	-1.2047342760008	0.595557528499925	-2.02286801584938	0.0430867569011092	0.861475193858589	YBL013W	FMT1	Methionyl-tRNA formyltransferase; catalyzes the formylation of initiator Met-tRNA in mitochondria; potential Cdc28p substrate
1120	YBL013W_08	313.810814536842	-0.36263992274244	0.464619160758282	-0.780510046444475	0.435090716427383	0.999400262816908	YBL013W	FMT1	Methionyl-tRNA formyltransferase; catalyzes the formylation of initiator Met-tRNA in mitochondria; potential Cdc28p substrate
1121	YBL013W_09	44.2837284619662	1.9649033840139	1.06531274000364	1.84443807928852	0.0651193220920943	0.930583788218221	YBL013W	FMT1	Methionyl-tRNA formyltransferase; catalyzes the formylation of initiator Met-tRNA in mitochondria; potential Cdc28p substrate
1122	YBL014C_00	169.747062863441	0.755662938732577	0.587789876682201	1.28560046491093	0.198582534413056	0.999400262816908	YBL013W	FMT1	Methionyl-tRNA formyltransferase; catalyzes the formylation of initiator Met-tRNA in mitochondria; potential Cdc28p substrate
1123	YBL014C_01	155.647712460297	0.174797135904524	0.564255825415135	0.309783484780015	0.756725611466102	0.999400262816908	YBL014C	RRN6	Component of the core factor (CF) rDNA transcription factor complex; CF is required for transcription of 35S rRNA genes by RNA polymerase I and is composed of Rrn6p, Rrn7p, and Rrn11p
1124	YBL014C_07	147.86103967623	-1.17822512705012	0.666593667376151	-1.76753123336419	0.0771393030454786	0.9611905078235	YBL013W	FMT1	Methionyl-tRNA formyltransferase; catalyzes the formylation of initiator Met-tRNA in mitochondria; potential Cdc28p substrate
1125	YBL014C_09	76.7873932894243	1.20755530061934	0.806641069659722	1.49701688401353	0.134388864851613	0.999400262816908	YBL013W	FMT1	Methionyl-tRNA formyltransferase; catalyzes the formylation of initiator Met-tRNA in mitochondria; potential Cdc28p substrate
1126	YBL015W_02	53.7497370066958	-1.42429115956038	0.983202438957129	-1.44862451833532	0.147442470231542	0.999400262816908	YBL015W	ACH1	Protein with CoA transferase activity; particularly for CoASH transfer from succinyl-CoA to acetate; has minor acetyl-CoA-hydrolase activity; phosphorylated; required for acetate utilization and for diploid pseudohyphal growth
1127	YBL015W_03	375.111774763685	-0.134159849699304	0.445768979595378	-0.300962731460318	0.763442913675251	0.999400262816908	YBL015W	ACH1	Protein with CoA transferase activity; particularly for CoASH transfer from succinyl-CoA to acetate; has minor acetyl-CoA-hydrolase activity; phosphorylated; required for acetate utilization and for diploid pseudohyphal growth
1128	YBL015W_04	154.044349698527	0.0614363346666265	0.654391111087212	0.093883204746708	0.92520193557441	0.999400262816908	YBL015W	ACH1	Protein with CoA transferase activity; particularly for CoASH transfer from succinyl-CoA to acetate; has minor acetyl-CoA-hydrolase activity; phosphorylated; required for acetate utilization and for diploid pseudohyphal growth
1129	YBL015W_06	110.214012887634	0.0867109542142534	0.828990474849086	0.10459825154208	0.916694602163455	0.999400262816908	YBL015W	ACH1	Protein with CoA transferase activity; particularly for CoASH transfer from succinyl-CoA to acetate; has minor acetyl-CoA-hydrolase activity; phosphorylated; required for acetate utilization and for diploid pseudohyphal growth
1130	YBL015W_09	114.725990066172	0.692343939028984	0.885806044739341	0.781597668181091	0.434451057721192	0.999400262816908	YBL015W	ACH1	Protein with CoA transferase activity; particularly for CoASH transfer from succinyl-CoA to acetate; has minor acetyl-CoA-hydrolase activity; phosphorylated; required for acetate utilization and for diploid pseudohyphal growth
1131	YBL016W_00	245.036643834186	0.391396173608581	0.511765187838117	0.764796400595323	0.444392791453892	0.999400262816908	YBL016W	FUS3	Mitogen-activated serine/threonine protein kinase involved in mating; phosphoactivated by Ste7p; substrates include Ste12p, Far1p, Bni1p, Sst2p; inhibits invasive growth during mating by phosphorylating Tec1p, promoting its; inhibits recruitment of Ste5p, Cdc42p-mediated asymmetry and mating morphogenesis
1132	YBL016W_02	523.468773534591	-0.461913983883207	0.380716500878498	-1.21327544988817	0.225024525843358	0.999400262816908	YBL016W	FUS3	Mitogen-activated serine/threonine protein kinase involved in mating; phosphoactivated by Ste7p; substrates include Ste12p, Far1p, Bni1p, Sst2p; inhibits invasive growth during mating by phosphorylating Tec1p, promoting its; inhibits recruitment of Ste5p, Cdc42p-mediated asymmetry and mating morphogenesis
1133	YBL016W_04	215.117277838182	0.376391719717903	0.48818173998268	0.771007370597794	0.440702562812047	0.999400262816908	YBL016W	FUS3	Mitogen-activated serine/threonine protein kinase involved in mating; phosphoactivated by Ste7p; substrates include Ste12p, Far1p, Bni1p, Sst2p; inhibits invasive growth during mating by phosphorylating Tec1p, promoting its; inhibits recruitment of Ste5p, Cdc42p-mediated asymmetry and mating morphogenesis
1134	YBL016W_05	67.5294091573779	0.186727646721305	0.837261373839299	0.223021929060285	0.82351843937294	0.999400262816908	YBL016W	FUS3	Mitogen-activated serine/threonine protein kinase involved in mating; phosphoactivated by Ste7p; substrates include Ste12p, Far1p, Bni1p, Sst2p; inhibits invasive growth during mating by phosphorylating Tec1p, promoting its; inhibits recruitment of Ste5p, Cdc42p-mediated asymmetry and mating morphogenesis
1135	YBL016W_06	150.734230002835	0.396711357562749	0.544048698216825	0.72918354342729	0.465889396315412	0.999400262816908	YBL016W	FUS3	Mitogen-activated serine/threonine protein kinase involved in mating; phosphoactivated by Ste7p; substrates include Ste12p, Far1p, Bni1p, Sst2p; inhibits invasive growth during mating by phosphorylating Tec1p, promoting its; inhibits recruitment of Ste5p, Cdc42p-mediated asymmetry and mating morphogenesis
1136	YBL016W_07	105.215941941505	-0.536677295391484	0.708328761323946	-0.757666954520347	0.448650386532521	0.999400262816908	YBL016W	FUS3	Mitogen-activated serine/threonine protein kinase involved in mating; phosphoactivated by Ste7p; substrates include Ste12p, Far1p, Bni1p, Sst2p; inhibits invasive growth during mating by phosphorylating Tec1p, promoting its; inhibits recruitment of Ste5p, Cdc42p-mediated asymmetry and mating morphogenesis
1137	YBL016W_08	205.479410948888	-0.145091990332603	0.521580515581322	-0.278177550729424	0.780876066931797	0.999400262816908	YBL016W	FUS3	Mitogen-activated serine/threonine protein kinase involved in mating; phosphoactivated by Ste7p; substrates include Ste12p, Far1p, Bni1p, Sst2p; inhibits invasive growth during mating by phosphorylating Tec1p, promoting its; inhibits recruitment of Ste5p, Cdc42p-mediated asymmetry and mating morphogenesis
1138	YBL016W_09	119.887599311107	-0.181472276830001	0.778883928130803	-0.232990141760282	0.815769060874604	0.999400262816908	YBL016W	FUS3	Mitogen-activated serine/threonine protein kinase involved in mating; phosphoactivated by Ste7p; substrates include Ste12p, Far1p, Bni1p, Sst2p; inhibits invasive growth during mating by phosphorylating Tec1p, promoting its; inhibits recruitment of Ste5p, Cdc42p-mediated asymmetry and mating morphogenesis
1139	YBL017C_00	117.873589979657	1.12887370577016	0.617820031516996	1.82718857949348	0.067671420401767	0.939425520826996	YBL017C	PEP1	Type I transmembrane sorting receptor for multiple vacuolar hydrolases; cycles between the late-Golgi and prevacuolar endosome-like compartments
1140	YBL017C_01	49.0872201164895	0.570626045130235	0.976114956789649	0.584588978133243	0.558824120542512	0.999400262816908	YBL017C	PEP1	Type I transmembrane sorting receptor for multiple vacuolar hydrolases; cycles between the late-Golgi and prevacuolar endosome-like compartments
1141	YBL017C_02	138.729484695074	1.29234669380824	0.660343824610527	1.95708151669392	0.0503378851497074	0.890248061509792	YBL017C	PEP1	Type I transmembrane sorting receptor for multiple vacuolar hydrolases; cycles between the late-Golgi and prevacuolar endosome-like compartments
1142	YBL017C_03	110.859517881152	0.953431929911365	0.763060882786574	1.24948343103317	0.211488309960495	0.999400262816908	YBL017C	PEP1	Type I transmembrane sorting receptor for multiple vacuolar hydrolases; cycles between the late-Golgi and prevacuolar endosome-like compartments
1143	YBL017C_05	189.133120217683	0.428404117440162	0.65965068125288	0.649440877748341	0.516053449295248	0.999400262816908	YBL017C	PEP1	Type I transmembrane sorting receptor for multiple vacuolar hydrolases; cycles between the late-Golgi and prevacuolar endosome-like compartments
1144	YBL017C_06	182.899982802563	-0.148656330241604	0.585378703249262	-0.253948989630912	0.799534966777756	0.999400262816908	YBL017C	PEP1	Type I transmembrane sorting receptor for multiple vacuolar hydrolases; cycles between the late-Golgi and prevacuolar endosome-like compartments
1145	YBL017C_08	180.684298191229	-0.265950373080211	0.544798206525408	-0.488163084780288	0.625434329923904	0.999400262816908	YBL017C	PEP1	Type I transmembrane sorting receptor for multiple vacuolar hydrolases; cycles between the late-Golgi and prevacuolar endosome-like compartments
1146	YBL018C_00	244.633328055941	0.12467977039976	0.55022573328447	0.226597490552663	0.820736743790852	0.999400262816908	YBL018C	POP8	Subunit of both RNase MRP and nuclear RNase P; RNase MRP cleaves pre-rRNA, while nuclear RNase P cleaves tRNA precursors to generate mature 5' ends and facilitates turnover of nuclear RNAs; relocalizes to the cytosol in response to hypoxia
1147	YBL018C_03	201.942560709712	-0.546304330574548	0.586644289755145	-0.931236083117021	0.351731456622045	0.999400262816908	YBL018C	POP8	Subunit of both RNase MRP and nuclear RNase P; RNase MRP cleaves pre-rRNA, while nuclear RNase P cleaves tRNA precursors to generate mature 5' ends and facilitates turnover of nuclear RNAs; relocalizes to the cytosol in response to hypoxia
1148	YBL018C_04	185.101107615897	-0.71137936449231	0.660470229001634	-1.07708013662876	0.281444466188813	0.999400262816908	YBL018C	POP8	Subunit of both RNase MRP and nuclear RNase P; RNase MRP cleaves pre-rRNA, while nuclear RNase P cleaves tRNA precursors to generate mature 5' ends and facilitates turnover of nuclear RNAs; relocalizes to the cytosol in response to hypoxia
1149	YBL018C_05	74.0557675735708	1.29864499577319	0.912317642717222	1.42345706688883	0.154603699493567	0.999400262816908	YBL018C	POP8	Subunit of both RNase MRP and nuclear RNase P; RNase MRP cleaves pre-rRNA, while nuclear RNase P cleaves tRNA precursors to generate mature 5' ends and facilitates turnover of nuclear RNAs; relocalizes to the cytosol in response to hypoxia
1150	YBL018C_07	219.71542711269	0.779936464332871	0.507055125789999	1.53816897742177	0.124007304072161	0.999400262816908	YBL018C	POP8	Subunit of both RNase MRP and nuclear RNase P; RNase MRP cleaves pre-rRNA, while nuclear RNase P cleaves tRNA precursors to generate mature 5' ends and facilitates turnover of nuclear RNAs; relocalizes to the cytosol in response to hypoxia
1151	YBL018C_08	329.774575297554	0.142342030793019	0.563073210561651	0.252794890829626	0.800426716029491	0.999400262816908	YBL018C	POP8	Subunit of both RNase MRP and nuclear RNase P; RNase MRP cleaves pre-rRNA, while nuclear RNase P cleaves tRNA precursors to generate mature 5' ends and facilitates turnover of nuclear RNAs; relocalizes to the cytosol in response to hypoxia
1152	YBL018C_09	276.872420718663	0.511670805007952	0.543717959603609	0.941059231114933	0.346674506426782	0.999400262816908	YBL018C	POP8	Subunit of both RNase MRP and nuclear RNase P; RNase MRP cleaves pre-rRNA, while nuclear RNase P cleaves tRNA precursors to generate mature 5' ends and facilitates turnover of nuclear RNAs; relocalizes to the cytosol in response to hypoxia
1153	YBL019W_00	163.21770425084	0.413145618547747	0.656288005132062	0.629518771205656	0.529009483567698	0.999400262816908	YBL019W	APN2	Class II abasic (AP) endonuclease involved in repair of DNA damage; homolog of human HAP1 and E. coli exoIII
1154	YBL019W_01	116.589980584184	-0.894266456488453	0.818249412858418	-1.09290204482333	0.274436810394431	0.999400262816908	YBL019W	APN2	Class II abasic (AP) endonuclease involved in repair of DNA damage; homolog of human HAP1 and E. coli exoIII
1155	YBL019W_02	72.3536916079464	-1.25946281081479	1.05327477934381	-1.19575901323625	0.231790614733004	0.999400262816908	YBL019W	APN2	Class II abasic (AP) endonuclease involved in repair of DNA damage; homolog of human HAP1 and E. coli exoIII
1156	YBL019W_06	169.395616141938	0.422085959080773	0.626033933229431	0.674222173394691	0.500170074622608	0.999400262816908	YBL019W	APN2	Class II abasic (AP) endonuclease involved in repair of DNA damage; homolog of human HAP1 and E. coli exoIII
1157	YBL019W_07	263.678428063362	-0.399248023769384	0.489692698347873	-0.815303199570605	0.414898777770784	0.999400262816908	YBL019W	APN2	Class II abasic (AP) endonuclease involved in repair of DNA damage; homolog of human HAP1 and E. coli exoIII
1158	YBL019W_08	299.222402785331	-0.528078677011501	0.451844092825712	-1.1687187802081	0.242516952888051	0.999400262816908	YBL019W	APN2	Class II abasic (AP) endonuclease involved in repair of DNA damage; homolog of human HAP1 and E. coli exoIII
1159	YBL019W_09	249.646743263919	0.825962081019882	0.477030311582079	1.7314666614802	0.0833685660464344	0.966234702323026	YBL019W	APN2	Class II abasic (AP) endonuclease involved in repair of DNA damage; homolog of human HAP1 and E. coli exoIII
1160	YBL020W_00	557.993231848032	-0.230889647826456	0.403218139298169	-0.572617214662852	0.566903901283304	0.999400262816908	NA	NA	NA
1161	YBL020W_02	382.179448032823	0.224256272533712	0.436415649277734	0.513859374440067	0.607350312640536	0.999400262816908	YBL020W	RFT1	Membrane protein required for translocation of Man5GlcNac2-PP-Dol; required for translocation of Man5GlcNac2-PP-Dol from the cytoplasmic side to the lumenal side of the ER membrane but is not the flippase; mutation is suppressed by expression of human p53 protein; essential gene
1162	YBL020W_03	458.40218481743	0.147474236529378	0.457553498437401	0.322310368149341	0.747217579261222	0.999400262816908	YBL020W	RFT1	Membrane protein required for translocation of Man5GlcNac2-PP-Dol; required for translocation of Man5GlcNac2-PP-Dol from the cytoplasmic side to the lumenal side of the ER membrane but is not the flippase; mutation is suppressed by expression of human p53 protein; essential gene
1163	YBL020W_04	391.639159502031	0.205256927401526	0.381360456572241	0.538222890874489	0.590423178454793	0.999400262816908	YBL020W	RFT1	Membrane protein required for translocation of Man5GlcNac2-PP-Dol; required for translocation of Man5GlcNac2-PP-Dol from the cytoplasmic side to the lumenal side of the ER membrane but is not the flippase; mutation is suppressed by expression of human p53 protein; essential gene
1164	YBL020W_06	436.874962520764	-0.585927078311984	0.385156607068087	-1.52126970577557	0.128192169232952	0.999400262816908	YBL020W	RFT1	Membrane protein required for translocation of Man5GlcNac2-PP-Dol; required for translocation of Man5GlcNac2-PP-Dol from the cytoplasmic side to the lumenal side of the ER membrane but is not the flippase; mutation is suppressed by expression of human p53 protein; essential gene
1165	YBL020W_07	69.2532143908409	-2.04462857920606	1.07016866668299	-1.91056666379836	0.0560602918094599	0.917761511186471	NA	NA	NA
1166	YBL020W_09	468.689806629972	-0.198670902028499	0.388562192728213	-0.51129756251778	0.609142711545235	0.999400262816908	NA	NA	NA
1167	YBL022C_00	132.784540691077	-0.585765526460511	0.801313785542231	-0.73100642598347	0.464775227901426	0.999400262816908	YBL022C	PIM1	ATP-dependent Lon protease; involved in degradation of misfolded proteins in mitochondria; required for biogenesis and maintenance of mitochondria
1168	YBL022C_01	106.687601099426	1.38286276951584	0.656928303789471	2.10504367301399	0.0352875066197107	0.81736762149	YBL022C	PIM1	ATP-dependent Lon protease; involved in degradation of misfolded proteins in mitochondria; required for biogenesis and maintenance of mitochondria
1169	YBL022C_03	72.7025757389969	-0.00201707694635115	0.829927250703466	-0.00243042621463679	0.998060802356302	0.999798556814869	YBL022C	PIM1	ATP-dependent Lon protease; involved in degradation of misfolded proteins in mitochondria; required for biogenesis and maintenance of mitochondria
1170	YBL022C_07	123.442479909432	-1.43643849304832	0.810879621365444	-1.77145713765688	0.0764847142951259	0.959366378653765	YBL022C	PIM1	ATP-dependent Lon protease; involved in degradation of misfolded proteins in mitochondria; required for biogenesis and maintenance of mitochondria
1171	YBL022C_08	49.143742125331	-0.310528904386363	1.11124462023017	-0.279442436645537	0.779905307881283	0.999400262816908	YBL022C	PIM1	ATP-dependent Lon protease; involved in degradation of misfolded proteins in mitochondria; required for biogenesis and maintenance of mitochondria
1172	YBL023C_00	91.2828181041018	-0.916524175779482	0.81768317638897	-1.12087933596361	0.262339227868211	0.999400262816908	YBL023C	MCM2	Protein involved in DNA replication; component of the Mcm2-7 hexameric helicase complex that binds chromatin as a part of the pre-replicative complex; relative distribution to the nucleus increases upon DNA replication stress
1173	YBL023C_01	288.883455698113	-0.198799157537347	0.458378046821046	-0.433701305976722	0.664505358133719	0.999400262816908	YBL023C	MCM2	Protein involved in DNA replication; component of the Mcm2-7 hexameric helicase complex that binds chromatin as a part of the pre-replicative complex; relative distribution to the nucleus increases upon DNA replication stress
1174	YBL023C_02	423.00048364242	0.285618993880426	0.396244984305714	0.720814155870963	0.471023864685544	0.999400262816908	YBL023C	MCM2	Protein involved in DNA replication; component of the Mcm2-7 hexameric helicase complex that binds chromatin as a part of the pre-replicative complex; relative distribution to the nucleus increases upon DNA replication stress
1175	YBL023C_03	233.92076664122	-0.0787623204430748	0.486064791044279	-0.162040785290905	0.871273736248065	0.999400262816908	YBL023C	MCM2	Protein involved in DNA replication; component of the Mcm2-7 hexameric helicase complex that binds chromatin as a part of the pre-replicative complex; relative distribution to the nucleus increases upon DNA replication stress
1176	YBL023C_04	89.1603492702289	-0.853611542324819	0.82659275793579	-1.03268693577295	0.301750429246429	0.999400262816908	YBL023C	MCM2	Protein involved in DNA replication; component of the Mcm2-7 hexameric helicase complex that binds chromatin as a part of the pre-replicative complex; relative distribution to the nucleus increases upon DNA replication stress
1177	YBL023C_05	61.7083895114981	0.847103029237208	0.842976575099231	1.00489509941304	0.314947364438728	0.999400262816908	YBL023C	MCM2	Protein involved in DNA replication; component of the Mcm2-7 hexameric helicase complex that binds chromatin as a part of the pre-replicative complex; relative distribution to the nucleus increases upon DNA replication stress
1178	YBL023C_08	81.1216412221311	0.844232407791879	0.781972688406914	1.07961879015468	0.280311970534572	0.999400262816908	YBL023C	MCM2	Protein involved in DNA replication; component of the Mcm2-7 hexameric helicase complex that binds chromatin as a part of the pre-replicative complex; relative distribution to the nucleus increases upon DNA replication stress
1179	YBL023C_09	331.675923980125	-0.451402943786307	0.485903880072447	-0.928996376235983	0.352890964323146	0.999400262816908	YBL023C	MCM2	Protein involved in DNA replication; component of the Mcm2-7 hexameric helicase complex that binds chromatin as a part of the pre-replicative complex; relative distribution to the nucleus increases upon DNA replication stress
1180	YBL024W_00	143.062587397708	0.0295237538869923	0.762267220574179	0.0387315013555922	0.969104457795533	0.999400262816908	YBL024W	NCL1	S-adenosyl-L-methionine-dependent tRNA: m5C-methyltransferase; methylates cytosine to m5C at several positions in tRNAs and intron-containing pre-tRNAs; increases proportion of tRNALeu(CAA) with m5C at wobble position in response to hydrogen peroxide, causing selective translation of mRNA from genes enriched in TTG codon; loss of NCL1 confers hypersensitivity to oxidative stress; similar to Nop2p…
1181	YBL024W_02	234.704468741813	0.316205738123399	0.513578681264115	0.615690934337646	0.538098521749917	0.999400262816908	YBL024W	NCL1	S-adenosyl-L-methionine-dependent tRNA: m5C-methyltransferase; methylates cytosine to m5C at several positions in tRNAs and intron-containing pre-tRNAs; increases proportion of tRNALeu(CAA) with m5C at wobble position in response to hydrogen peroxide, causing selective translation of mRNA from genes enriched in TTG codon; loss of NCL1 confers hypersensitivity to oxidative stress; similar to Nop2p…
1182	YBL024W_03	363.828970414254	0.402325935446368	0.432817125851336	0.929551793162081	0.352603196917868	0.999400262816908	YBL024W	NCL1	S-adenosyl-L-methionine-dependent tRNA: m5C-methyltransferase; methylates cytosine to m5C at several positions in tRNAs and intron-containing pre-tRNAs; increases proportion of tRNALeu(CAA) with m5C at wobble position in response to hydrogen peroxide, causing selective translation of mRNA from genes enriched in TTG codon; loss of NCL1 confers hypersensitivity to oxidative stress; similar to Nop2p…
1183	YBL024W_05	80.2805640426977	0.575391008505302	0.855408151206268	0.672650836555514	0.501169451791635	0.999400262816908	YBL024W	NCL1	S-adenosyl-L-methionine-dependent tRNA: m5C-methyltransferase; methylates cytosine to m5C at several positions in tRNAs and intron-containing pre-tRNAs; increases proportion of tRNALeu(CAA) with m5C at wobble position in response to hydrogen peroxide, causing selective translation of mRNA from genes enriched in TTG codon; loss of NCL1 confers hypersensitivity to oxidative stress; similar to Nop2p…
1184	YBL024W_08	403.33342234398	0.338619870513273	0.435436064547456	0.777656923904998	0.436771293110068	0.999400262816908	YBL024W	NCL1	S-adenosyl-L-methionine-dependent tRNA: m5C-methyltransferase; methylates cytosine to m5C at several positions in tRNAs and intron-containing pre-tRNAs; increases proportion of tRNALeu(CAA) with m5C at wobble position in response to hydrogen peroxide, causing selective translation of mRNA from genes enriched in TTG codon; loss of NCL1 confers hypersensitivity to oxidative stress; similar to Nop2p…
1185	YBL025W_02	175.782907013035	0.892831211418863	0.54987742449871	1.62369133854295	0.104441700503848	0.999400262816908	YBL025W	RRN10	Protein involved in promoting high level transcription of rDNA; subunit of UAF (upstream activation factor) for RNA polymerase I
1186	YBL025W_03	317.151862252062	-0.117542805435711	0.470332022494322	-0.249914528065395	0.80265344788426	0.999400262816908	YBL025W	RRN10	Protein involved in promoting high level transcription of rDNA; subunit of UAF (upstream activation factor) for RNA polymerase I
1187	YBL025W_05	124.283408253012	1.80339262158178	0.619939557394451	2.9089813677341	0.00362608470057229	0.306478665788096	YBL025W	RRN10	Protein involved in promoting high level transcription of rDNA; subunit of UAF (upstream activation factor) for RNA polymerase I
1188	YBL025W_07	73.9415206440611	-1.33143921890441	0.80397892052112	-1.65606234805435	0.09770919328442	0.996496176544827	YBL025W	RRN10	Protein involved in promoting high level transcription of rDNA; subunit of UAF (upstream activation factor) for RNA polymerase I
1189	YBL025W_08	86.845741227721	0.282290804346673	0.739537251969493	0.381712758342994	0.70267443561859	0.999400262816908	YBL025W	RRN10	Protein involved in promoting high level transcription of rDNA; subunit of UAF (upstream activation factor) for RNA polymerase I
1190	YBL025W_09	162.393630452191	-0.0220548660216499	0.576613028676788	-0.0382489900935145	0.969489161003946	0.999400262816908	YBL025W	RRN10	Protein involved in promoting high level transcription of rDNA; subunit of UAF (upstream activation factor) for RNA polymerase I
1191	YBL026W_00	380.449973882018	-0.139533462355276	0.526473987260641	-0.265033915695056	0.790983334807597	0.999400262816908	YBL026W	LSM2	Lsm (Like Sm) protein; part of heteroheptameric complexes (Lsm2p-7p and either Lsm1p or 8p): cytoplasmic Lsm1p complex involved in mRNA decay; nuclear Lsm8p complex part of U6 snRNP and possibly involved in processing tRNA, snoRNA, and rRNA; relocalizes from nucleus to cytoplasmic foci upon DNA replication stress
1192	YBL026W_02	105.481712321037	1.1908131094608	0.754869670407522	1.5775082191578	0.11467863240629	0.999400262816908	YBL026W	LSM2	Lsm (Like Sm) protein; part of heteroheptameric complexes (Lsm2p-7p and either Lsm1p or 8p): cytoplasmic Lsm1p complex involved in mRNA decay; nuclear Lsm8p complex part of U6 snRNP and possibly involved in processing tRNA, snoRNA, and rRNA; relocalizes from nucleus to cytoplasmic foci upon DNA replication stress
1193	YBL026W_03	46.3130992028311	0.183308953198425	1.02402907485603	0.179007566971863	0.857931760081708	0.999400262816908	YBL026W	LSM2	Lsm (Like Sm) protein; part of heteroheptameric complexes (Lsm2p-7p and either Lsm1p or 8p): cytoplasmic Lsm1p complex involved in mRNA decay; nuclear Lsm8p complex part of U6 snRNP and possibly involved in processing tRNA, snoRNA, and rRNA; relocalizes from nucleus to cytoplasmic foci upon DNA replication stress
1194	YBL026W_04	136.516148497795	-0.731380791917733	0.714737126084871	-1.02328641569808	0.306172444661579	0.999400262816908	YBL026W	LSM2	Lsm (Like Sm) protein; part of heteroheptameric complexes (Lsm2p-7p and either Lsm1p or 8p): cytoplasmic Lsm1p complex involved in mRNA decay; nuclear Lsm8p complex part of U6 snRNP and possibly involved in processing tRNA, snoRNA, and rRNA; relocalizes from nucleus to cytoplasmic foci upon DNA replication stress
1195	YBL026W_05	247.881702561489	0.156495604649126	0.481400059803671	0.325084306622125	0.745117265972088	0.999400262816908	YBL026W	LSM2	Lsm (Like Sm) protein; part of heteroheptameric complexes (Lsm2p-7p and either Lsm1p or 8p): cytoplasmic Lsm1p complex involved in mRNA decay; nuclear Lsm8p complex part of U6 snRNP and possibly involved in processing tRNA, snoRNA, and rRNA; relocalizes from nucleus to cytoplasmic foci upon DNA replication stress
1196	YBL026W_06	249.070135223095	-0.795377869603173	0.623815614948487	-1.27502077624147	0.202301888369036	0.999400262816908	YBL026W	LSM2	Lsm (Like Sm) protein; part of heteroheptameric complexes (Lsm2p-7p and either Lsm1p or 8p): cytoplasmic Lsm1p complex involved in mRNA decay; nuclear Lsm8p complex part of U6 snRNP and possibly involved in processing tRNA, snoRNA, and rRNA; relocalizes from nucleus to cytoplasmic foci upon DNA replication stress
1197	YBL027W_00	140.394201996329	-1.11619274006706	0.65398275709882	-1.70676172720315	0.0878663488098595	0.979074240880944	YBL027W	RPL19B	Ribosomal 60S subunit protein L19B; rpl19a and rpl19b single null mutations result in slow growth, while the double null mutation is lethal; homologous to mammalian ribosomal protein L19, no bacterial homolog; RPL19B has a paralog, RPL19A, that arose from the whole genome duplication
1198	YBL027W_01	176.665155462905	-0.572166927485025	0.603575912580157	-0.947961831410957	0.34314888554856	0.999400262816908	YBL027W	RPL19B	Ribosomal 60S subunit protein L19B; rpl19a and rpl19b single null mutations result in slow growth, while the double null mutation is lethal; homologous to mammalian ribosomal protein L19, no bacterial homolog; RPL19B has a paralog, RPL19A, that arose from the whole genome duplication
1199	YBL027W_02	110.115071530891	-0.131670549284225	0.680829230572375	-0.193397321048524	0.846647813325517	0.999400262816908	YBL027W	RPL19B	Ribosomal 60S subunit protein L19B; rpl19a and rpl19b single null mutations result in slow growth, while the double null mutation is lethal; homologous to mammalian ribosomal protein L19, no bacterial homolog; RPL19B has a paralog, RPL19A, that arose from the whole genome duplication
1200	YBL027W_03	273.081518668468	-0.0803781271540972	0.497331293142622	-0.16161888114096	0.871605987793193	0.999400262816908	YBL027W	RPL19B	Ribosomal 60S subunit protein L19B; rpl19a and rpl19b single null mutations result in slow growth, while the double null mutation is lethal; homologous to mammalian ribosomal protein L19, no bacterial homolog; RPL19B has a paralog, RPL19A, that arose from the whole genome duplication
1201	YBL027W_07	92.4458291954421	2.42210418163848	0.813133139524053	2.97873012906127	0.0028944558471784	0.263678098690669	YBL027W	RPL19B	Ribosomal 60S subunit protein L19B; rpl19a and rpl19b single null mutations result in slow growth, while the double null mutation is lethal; homologous to mammalian ribosomal protein L19, no bacterial homolog; RPL19B has a paralog, RPL19A, that arose from the whole genome duplication
1202	YBL027W_08	30.4629854336642	1.75312707086841	1.15317405783131	1.52026232203436	0.128445059574501	0.999400262816908	YBL027W	RPL19B	Ribosomal 60S subunit protein L19B; rpl19a and rpl19b single null mutations result in slow growth, while the double null mutation is lethal; homologous to mammalian ribosomal protein L19, no bacterial homolog; RPL19B has a paralog, RPL19A, that arose from the whole genome duplication
1203	YBL028C_00	100.203212838171	0.0836511392400326	0.832152037189002	0.100523865233335	0.919928437080718	0.999400262816908	YBL028C		Protein of unknown function that may interact with ribosomes; green fluorescent protein (GFP)-fusion protein localizes to the nucleolus; predicted to be involved in ribosome biogenesis
1204	YBL028C_01	221.136251273023	1.03436331180734	0.518877398733698	1.99346380152935	0.046210683526916	0.870637601994823	YBL028C		Protein of unknown function that may interact with ribosomes; green fluorescent protein (GFP)-fusion protein localizes to the nucleolus; predicted to be involved in ribosome biogenesis
1205	YBL028C_02	147.548304813104	-1.08895031980751	0.64416547244889	-1.69048228503727	0.0909357245553822	0.985142525474078	YBL028C		Protein of unknown function that may interact with ribosomes; green fluorescent protein (GFP)-fusion protein localizes to the nucleolus; predicted to be involved in ribosome biogenesis
1206	YBL028C_03	162.043576658934	-0.0101845955590959	0.553524775662803	-0.0183995297173475	0.985320127611092	0.999761532217726	YBL028C		Protein of unknown function that may interact with ribosomes; green fluorescent protein (GFP)-fusion protein localizes to the nucleolus; predicted to be involved in ribosome biogenesis
1207	YBL028C_05	299.218395413709	0.0180267507329575	0.43976929367267	0.0409913811453494	0.967302766938224	0.999400262816908	YBL028C		Protein of unknown function that may interact with ribosomes; green fluorescent protein (GFP)-fusion protein localizes to the nucleolus; predicted to be involved in ribosome biogenesis
1208	YBL028C_07	99.9620250411361	0.509594566005972	0.756617902032334	0.673516400599513	0.500618818409295	0.999400262816908	YBL028C		Protein of unknown function that may interact with ribosomes; green fluorescent protein (GFP)-fusion protein localizes to the nucleolus; predicted to be involved in ribosome biogenesis
1209	YBL029C-A_00	161.160353861799	0.544919832838405	0.589459457648864	0.924439884316877	0.355257337055779	0.999400262816908	YBL029C-A		Protein of unknown function; green fluorescent protein (GFP)-fusion protein localizes to the cell periphery; protein abundance increases in response to DNA replication stress; has potential orthologs in Saccharomyces species and in Yarrowia lipolytica
1210	YBL029C-A_02	156.650606065476	0.207044382599738	0.76512152229742	0.270603265711372	0.786696183839329	0.999400262816908	YBL029C-A		Protein of unknown function; green fluorescent protein (GFP)-fusion protein localizes to the cell periphery; protein abundance increases in response to DNA replication stress; has potential orthologs in Saccharomyces species and in Yarrowia lipolytica
1211	YBL029C-A_03	145.597471495134	-0.462111374096177	0.631861496472665	-0.731349159073452	0.464565910839766	0.999400262816908	YBL029C-A		Protein of unknown function; green fluorescent protein (GFP)-fusion protein localizes to the cell periphery; protein abundance increases in response to DNA replication stress; has potential orthologs in Saccharomyces species and in Yarrowia lipolytica
1212	YBL029C-A_04	169.109995525292	-0.230648092535142	0.71130032257278	-0.324262600782867	0.745739231498634	0.999400262816908	YBL029C-A		Protein of unknown function; green fluorescent protein (GFP)-fusion protein localizes to the cell periphery; protein abundance increases in response to DNA replication stress; has potential orthologs in Saccharomyces species and in Yarrowia lipolytica
1213	YBL029C-A_06	112.154084571605	-0.837053450646412	0.680954905014379	-1.22923477675623	0.218983793509535	0.999400262816908	YBL029C-A		Protein of unknown function; green fluorescent protein (GFP)-fusion protein localizes to the cell periphery; protein abundance increases in response to DNA replication stress; has potential orthologs in Saccharomyces species and in Yarrowia lipolytica
1214	YBL029C-A_09	69.5180236210916	-0.607199592378033	0.788217658276808	-0.770345076644801	0.441095224035881	0.999400262816908	YBL029C-A		Protein of unknown function; green fluorescent protein (GFP)-fusion protein localizes to the cell periphery; protein abundance increases in response to DNA replication stress; has potential orthologs in Saccharomyces species and in Yarrowia lipolytica
1215	YBL029W_02	107.640813161142	-0.385018204375309	0.822644509824543	-0.468025009317119	0.639766705120641	0.999400262816908	YBL029W		Non-essential protein of unknown function
1216	YBL029W_03	84.6341027907528	0.361843479944393	0.830090366190809	0.435908540421752	0.66290308845753	0.999400262816908	YBL029W		Non-essential protein of unknown function
1217	YBL029W_04	155.340154827208	-0.639563220429213	0.63541517302886	-1.00652808994249	0.314161606297855	0.999400262816908	YBL029W		Non-essential protein of unknown function
1218	YBL029W_05	342.988818413737	0.0624082341727141	0.454140334449706	0.137420593236529	0.890698354414275	0.999400262816908	YBL029W		Non-essential protein of unknown function
1219	YBL029W_07	161.581643226664	-0.00947082950226518	0.576612362263883	-0.0164249504902757	0.98689537481995	0.999761532217726	YBL029W		Non-essential protein of unknown function
1220	YBL029W_08	272.98638624117	0.256717204082855	0.494396466821595	0.519253719051136	0.60358382263052	0.999400262816908	YBL029W		Non-essential protein of unknown function
1221	YBL029W_09	173.016098028141	0.0318312323422473	0.660747443678741	0.0481745826590346	0.961577106761462	0.999400262816908	YBL029W		Non-essential protein of unknown function
1222	YBL030C_02	182.858547391435	0.520003585656056	0.572728997104022	0.907940034964931	0.363909904187794	0.999400262816908	YBL030C	PET9	Major ADP/ATP carrier of the mitochondrial inner membrane; exchanges cytosolic ADP for mitochondrially synthesized ATP; also imports heme and ATP; required for viability in many lab strains that carry a sal1 mutation; PET9 has a paralog, AAC3, that arose from the whole genome duplication; human homolog SLC25A4 implicated in progressive external ophthalmoplegia can complement yeast null mutant
1223	YBL030C_03	142.230713225619	0.137104525857951	0.701802178737454	0.195360644369333	0.845110624196757	0.999400262816908	YBL030C	PET9	Major ADP/ATP carrier of the mitochondrial inner membrane; exchanges cytosolic ADP for mitochondrially synthesized ATP; also imports heme and ATP; required for viability in many lab strains that carry a sal1 mutation; PET9 has a paralog, AAC3, that arose from the whole genome duplication; human homolog SLC25A4 implicated in progressive external ophthalmoplegia can complement yeast null mutant
1224	YBL030C_04	413.566807196372	-0.570899681103841	0.393443357560996	-1.4510339801971	0.146770398421096	0.999400262816908	YBL030C	PET9	Major ADP/ATP carrier of the mitochondrial inner membrane; exchanges cytosolic ADP for mitochondrially synthesized ATP; also imports heme and ATP; required for viability in many lab strains that carry a sal1 mutation; PET9 has a paralog, AAC3, that arose from the whole genome duplication; human homolog SLC25A4 implicated in progressive external ophthalmoplegia can complement yeast null mutant
1225	YBL030C_05	376.780971821114	-0.0246074262059544	0.437250724731576	-0.0562776110229678	0.955120654377834	0.999400262816908	YBL030C	PET9	Major ADP/ATP carrier of the mitochondrial inner membrane; exchanges cytosolic ADP for mitochondrially synthesized ATP; also imports heme and ATP; required for viability in many lab strains that carry a sal1 mutation; PET9 has a paralog, AAC3, that arose from the whole genome duplication; human homolog SLC25A4 implicated in progressive external ophthalmoplegia can complement yeast null mutant
1226	YBL030C_08	115.842273893676	-0.284751966839784	0.728323141891322	-0.390969269629872	0.695819950859807	0.999400262816908	YBL030C	PET9	Major ADP/ATP carrier of the mitochondrial inner membrane; exchanges cytosolic ADP for mitochondrially synthesized ATP; also imports heme and ATP; required for viability in many lab strains that carry a sal1 mutation; PET9 has a paralog, AAC3, that arose from the whole genome duplication; human homolog SLC25A4 implicated in progressive external ophthalmoplegia can complement yeast null mutant
1227	YBL031W_00	68.7962041136052	-0.561293865490383	0.875329509285255	-0.641237224995081	0.521368567642548	0.999400262816908	YBL031W	SHE1	Mitotic spindle protein; interacts with components of the Dam1 (DASH) complex, its effector Sli15p, and microtubule-associated protein Bim1p; also localizes to nuclear microtubules and to the bud neck in a ring-shaped structure; inhibits dynein function
1228	YBL031W_03	167.085908449568	-0.705202449217327	0.608677626816726	-1.15858119002239	0.246626939763874	0.999400262816908	YBL031W	SHE1	Mitotic spindle protein; interacts with components of the Dam1 (DASH) complex, its effector Sli15p, and microtubule-associated protein Bim1p; also localizes to nuclear microtubules and to the bud neck in a ring-shaped structure; inhibits dynein function
1229	YBL031W_05	137.77188525105	0.0541644472921869	0.624243886734623	0.0867680860689199	0.930855855549163	0.999400262816908	YBL031W	SHE1	Mitotic spindle protein; interacts with components of the Dam1 (DASH) complex, its effector Sli15p, and microtubule-associated protein Bim1p; also localizes to nuclear microtubules and to the bud neck in a ring-shaped structure; inhibits dynein function
1230	YBL031W_07	196.711819285625	0.634125215575487	0.673629396191561	0.941356210344419	0.346522346082394	0.999400262816908	YBL031W	SHE1	Mitotic spindle protein; interacts with components of the Dam1 (DASH) complex, its effector Sli15p, and microtubule-associated protein Bim1p; also localizes to nuclear microtubules and to the bud neck in a ring-shaped structure; inhibits dynein function
1231	YBL031W_09	144.293069008178	-0.731749014447051	0.768876563254998	-0.951711951459713	0.341243086473988	0.999400262816908	YBL031W	SHE1	Mitotic spindle protein; interacts with components of the Dam1 (DASH) complex, its effector Sli15p, and microtubule-associated protein Bim1p; also localizes to nuclear microtubules and to the bud neck in a ring-shaped structure; inhibits dynein function
1232	YBL032W_00	120.67287211099	0.000116862531767807	0.816474744300306	0.000143130614368182	0.999885798293007	0.999939819893218	YBL032W	HEK2	RNA binding protein involved in asymmetric localization of ASH1 mRNA; represses translation of ASH1 mRNA, an effect reversed by Yck1p-dependent phosphoryation; regulates telomere position effect and length; similarity to hnRNP-K
1233	YBL032W_02	115.724779765938	1.1458934758219	0.756093816800296	1.51554403747301	0.129634686938457	0.999400262816908	YBL032W	HEK2	RNA binding protein involved in asymmetric localization of ASH1 mRNA; represses translation of ASH1 mRNA, an effect reversed by Yck1p-dependent phosphoryation; regulates telomere position effect and length; similarity to hnRNP-K
1234	YBL032W_03	69.8355857343295	0.40534517690751	0.816575937103684	0.496396181285026	0.619614918778435	0.999400262816908	YBL032W	HEK2	RNA binding protein involved in asymmetric localization of ASH1 mRNA; represses translation of ASH1 mRNA, an effect reversed by Yck1p-dependent phosphoryation; regulates telomere position effect and length; similarity to hnRNP-K
1235	YBL032W_04	159.944656193597	0.250575522916135	0.66418791552024	0.37726600719597	0.705975931279952	0.999400262816908	YBL032W	HEK2	RNA binding protein involved in asymmetric localization of ASH1 mRNA; represses translation of ASH1 mRNA, an effect reversed by Yck1p-dependent phosphoryation; regulates telomere position effect and length; similarity to hnRNP-K
1236	YBL032W_05	214.214229890273	0.949345361465511	0.558885811481832	1.69863922461802	0.0893871810624558	0.98437654419502	YBL032W	HEK2	RNA binding protein involved in asymmetric localization of ASH1 mRNA; represses translation of ASH1 mRNA, an effect reversed by Yck1p-dependent phosphoryation; regulates telomere position effect and length; similarity to hnRNP-K
1237	YBL032W_06	42.2202041202046	0.131884754703172	1.14033556180282	0.115654338179779	0.907926496170284	0.999400262816908	YBL032W	HEK2	RNA binding protein involved in asymmetric localization of ASH1 mRNA; represses translation of ASH1 mRNA, an effect reversed by Yck1p-dependent phosphoryation; regulates telomere position effect and length; similarity to hnRNP-K
1238	YBL032W_07	221.035516465144	0.469420253284276	0.552084548337224	0.850268776219299	0.39517567186199	0.999400262816908	YBL032W	HEK2	RNA binding protein involved in asymmetric localization of ASH1 mRNA; represses translation of ASH1 mRNA, an effect reversed by Yck1p-dependent phosphoryation; regulates telomere position effect and length; similarity to hnRNP-K
1239	YBL032W_08	283.446459225982	0.303969129113523	0.569311922295184	0.533923701945446	0.59339432283778	0.999400262816908	YBL032W	HEK2	RNA binding protein involved in asymmetric localization of ASH1 mRNA; represses translation of ASH1 mRNA, an effect reversed by Yck1p-dependent phosphoryation; regulates telomere position effect and length; similarity to hnRNP-K
1240	YBL032W_09	49.862257479281	-0.333051664428303	1.04439379995723	-0.318894716190333	0.749806351181964	0.999400262816908	YBL032W	HEK2	RNA binding protein involved in asymmetric localization of ASH1 mRNA; represses translation of ASH1 mRNA, an effect reversed by Yck1p-dependent phosphoryation; regulates telomere position effect and length; similarity to hnRNP-K
1241	YBL033C_00	109.590942290908	0.166909293461059	0.754408231692028	0.221245323750916	0.824901420300821	0.999400262816908	YBL033C	RIB1	GTP cyclohydrolase II; catalyzes the first step of the riboflavin biosynthesis pathway
1242	YBL033C_02	181.714187193644	0.534747743114928	0.582195491399719	0.918502034135103	0.358356094500755	0.999400262816908	YBL033C	RIB1	GTP cyclohydrolase II; catalyzes the first step of the riboflavin biosynthesis pathway
1243	YBL033C_03	186.449705985572	-0.546528713556157	0.727738581545909	-0.750995930977283	0.452655104621679	0.999400262816908	YBL033C	RIB1	GTP cyclohydrolase II; catalyzes the first step of the riboflavin biosynthesis pathway
1244	YBL033C_05	279.792237370243	-0.829264415555122	0.522491387791163	-1.58713508955783	0.112482052124365	0.999400262816908	YBL033C	RIB1	GTP cyclohydrolase II; catalyzes the first step of the riboflavin biosynthesis pathway
1245	YBL033C_06	88.2752770924609	0.57447889106903	0.689294941608952	0.833429721286046	0.404602418292897	0.999400262816908	YBL033C	RIB1	GTP cyclohydrolase II; catalyzes the first step of the riboflavin biosynthesis pathway
1246	YBL033C_07	282.246338929877	-0.0668301798230938	0.473017459189248	-0.141284805718674	0.887644952487457	0.999400262816908	YBL033C	RIB1	GTP cyclohydrolase II; catalyzes the first step of the riboflavin biosynthesis pathway
1247	YBL034C_01	161.024683058083	0.182887622856499	0.604975767417762	0.302305700007	0.762419033527999	0.999400262816908	YBL034C	STU1	Component of the mitotic spindle; binds to interpolar microtubules via its association with beta-tubulin (Tub2p); required for interpolar microtubules to provide an outward force on the spindle poles
1248	YBL034C_02	99.4945475005502	-0.521923844308084	0.776161169602886	-0.672442612112534	0.501301962790051	0.999400262816908	YBL034C	STU1	Component of the mitotic spindle; binds to interpolar microtubules via its association with beta-tubulin (Tub2p); required for interpolar microtubules to provide an outward force on the spindle poles
1249	YBL034C_04	69.3612736349158	0.214436014703881	0.82931510649008	0.258570009186786	0.79596702565055	0.999400262816908	YBL034C	STU1	Component of the mitotic spindle; binds to interpolar microtubules via its association with beta-tubulin (Tub2p); required for interpolar microtubules to provide an outward force on the spindle poles
1250	YBL034C_08	100.854912747778	-0.421789709717908	1.04231117176965	-0.404667743320633	0.685721755797001	0.999400262816908	YBL034C	STU1	Component of the mitotic spindle; binds to interpolar microtubules via its association with beta-tubulin (Tub2p); required for interpolar microtubules to provide an outward force on the spindle poles
1251	YBL034C_09	211.074367518534	0.212616215336022	0.538030496953153	0.395175025467998	0.692713722660927	0.999400262816908	YBL034C	STU1	Component of the mitotic spindle; binds to interpolar microtubules via its association with beta-tubulin (Tub2p); required for interpolar microtubules to provide an outward force on the spindle poles
1252	YBL035C_00	533.291717628619	0.749566081181475	0.354333735842395	2.11542397846892	0.0343938279022576	0.809936167142042	YBL035C	POL12	B subunit of DNA polymerase alpha-primase complex; required for initiation of DNA replication during mitotic and premeiotic DNA synthesis; also functions in telomere capping and length regulation
1253	YBL035C_01	223.889615279202	0.69944551989601	0.484925596354628	1.44237698557059	0.149196052726539	0.999400262816908	YBL035C	POL12	B subunit of DNA polymerase alpha-primase complex; required for initiation of DNA replication during mitotic and premeiotic DNA synthesis; also functions in telomere capping and length regulation
1254	YBL035C_02	68.8819300882688	-0.363483794373163	0.863756367636221	-0.420817498999032	0.67388835253759	0.999400262816908	YBL035C	POL12	B subunit of DNA polymerase alpha-primase complex; required for initiation of DNA replication during mitotic and premeiotic DNA synthesis; also functions in telomere capping and length regulation
1255	YBL035C_03	47.0981097721685	-1.10220508109296	1.04832667541624	-1.05139467204278	0.293077361844228	0.999400262816908	YBL035C	POL12	B subunit of DNA polymerase alpha-primase complex; required for initiation of DNA replication during mitotic and premeiotic DNA synthesis; also functions in telomere capping and length regulation
1256	YBL035C_04	104.303215983123	-0.209179915626573	0.788689410493162	-0.265224704228974	0.790836364947429	0.999400262816908	YBL035C	POL12	B subunit of DNA polymerase alpha-primase complex; required for initiation of DNA replication during mitotic and premeiotic DNA synthesis; also functions in telomere capping and length regulation
1257	YBL035C_05	140.856905899774	0.571418807892111	0.629148631646536	0.908241358479407	0.363750717320769	0.999400262816908	YBL035C	POL12	B subunit of DNA polymerase alpha-primase complex; required for initiation of DNA replication during mitotic and premeiotic DNA synthesis; also functions in telomere capping and length regulation
1258	YBL036C_02	142.426711515268	0.970454922556609	0.624745814404963	1.55335962271458	0.12033724349758	0.999400262816908	YBL036C		Putative non-specific single-domain racemase; based on structural similarity; binds pyridoxal 5'-phosphate; expression of GFP-fusion protein induced in response to the DNA-damaging agent MMS
1259	YBL036C_04	149.993695629101	-0.626118793657895	0.657271522120395	-0.952602954161167	0.340791279881201	0.999400262816908	YBL036C		Putative non-specific single-domain racemase; based on structural similarity; binds pyridoxal 5'-phosphate; expression of GFP-fusion protein induced in response to the DNA-damaging agent MMS
1260	YBL036C_05	176.641901638611	0.45597605790145	0.617047838482803	0.738963868705226	0.459928937566128	0.999400262816908	YBL036C		Putative non-specific single-domain racemase; based on structural similarity; binds pyridoxal 5'-phosphate; expression of GFP-fusion protein induced in response to the DNA-damaging agent MMS
1261	YBL036C_09	203.582486490827	-0.875409241966456	0.562756465038243	-1.55557385183832	0.11980946055027	0.999400262816908	YBL036C		Putative non-specific single-domain racemase; based on structural similarity; binds pyridoxal 5'-phosphate; expression of GFP-fusion protein induced in response to the DNA-damaging agent MMS
1262	YBL037W_00	139.373457941742	0.0820172567555315	0.636758056839709	0.128804427167504	0.897512402341672	0.999400262816908	YBL037W	APL3	Alpha-adaptin; large subunit of the clathrin associated protein complex (AP-2); involved in vesicle mediated transport
1263	YBL037W_01	37.9070958010828	1.34860011598278	1.12842973026823	1.19511218094388	0.232043203458292	0.999400262816908	YBL037W	APL3	Alpha-adaptin; large subunit of the clathrin associated protein complex (AP-2); involved in vesicle mediated transport
1264	YBL037W_02	129.23443718082	0.549431887342437	0.774325238269757	0.709562158364038	0.477975692982928	0.999400262816908	YBL037W	APL3	Alpha-adaptin; large subunit of the clathrin associated protein complex (AP-2); involved in vesicle mediated transport
1265	YBL037W_05	156.505801077508	-0.239070448267936	0.647408413094639	-0.369273002068617	0.711924246926271	0.999400262816908	YBL037W	APL3	Alpha-adaptin; large subunit of the clathrin associated protein complex (AP-2); involved in vesicle mediated transport
1266	YBL037W_06	379.965023483574	-0.038342629185419	0.517561402340915	-0.0740832469577452	0.940944145617201	0.999400262816908	YBL037W	APL3	Alpha-adaptin; large subunit of the clathrin associated protein complex (AP-2); involved in vesicle mediated transport
1267	YBL037W_07	138.405272322626	-0.0510233540398181	0.667473289455396	-0.0764425406167923	0.939067026077078	0.999400262816908	YBL037W	APL3	Alpha-adaptin; large subunit of the clathrin associated protein complex (AP-2); involved in vesicle mediated transport
1268	YBL037W_09	146.305885361457	-0.925563613081656	0.734645954399523	-1.25987709799366	0.207713701631214	0.999400262816908	YBL037W	APL3	Alpha-adaptin; large subunit of the clathrin associated protein complex (AP-2); involved in vesicle mediated transport
1269	YBL038W_00	136.749117523336	-0.564887958632684	0.626596277313742	-0.901518216888225	0.367312852501717	0.999400262816908	NA	NA	NA
1270	YBL038W_01	273.175915916942	0.156248191874917	0.431387402106128	0.362199246227587	0.717203142796045	0.999400262816908	YBL038W	MRPL16	Mitochondrial ribosomal protein of the large subunit; homologous to bacterial L16 ribosomal protein; synthetic lethality with hac1 mutation suggests a possible role in synthesis of precursors for protein glycosylation
1271	YBL038W_05	199.990900636528	0.11591913139494	0.555733318617852	0.208587693973863	0.83477011805518	0.999400262816908	YBL038W	MRPL16	Mitochondrial ribosomal protein of the large subunit; homologous to bacterial L16 ribosomal protein; synthetic lethality with hac1 mutation suggests a possible role in synthesis of precursors for protein glycosylation
1272	YBL038W_06	195.45261319467	-0.0035020216300001	0.528629180573743	-0.00662472250623625	0.99471427485509	0.999761532217726	YBL038W	MRPL16	Mitochondrial ribosomal protein of the large subunit; homologous to bacterial L16 ribosomal protein; synthetic lethality with hac1 mutation suggests a possible role in synthesis of precursors for protein glycosylation
1273	YBL038W_07	155.232759478655	0.505524407582909	0.603493332778054	0.837663616358169	0.402219653016177	0.999400262816908	YBL038W	MRPL16	Mitochondrial ribosomal protein of the large subunit; homologous to bacterial L16 ribosomal protein; synthetic lethality with hac1 mutation suggests a possible role in synthesis of precursors for protein glycosylation
1274	YBL038W_08	71.8535193270502	1.69025533863371	0.992795954531999	1.70252037280963	0.0886578627178122	0.982963185927944	YBL038W	MRPL16	Mitochondrial ribosomal protein of the large subunit; homologous to bacterial L16 ribosomal protein; synthetic lethality with hac1 mutation suggests a possible role in synthesis of precursors for protein glycosylation
1275	YBL039C_03	148.842741660291	1.04784241752867	0.667459978841189	1.56989550047312	0.116439424569738	0.999400262816908	YBL039C	URA7	Major CTP synthase isozyme (see also URA8); catalyzes the ATP-dependent transfer of the amide nitrogen from glutamine to UTP, forming CTP, the final step in de novo biosynthesis of pyrimidines; involved in phospholipid biosynthesis; capable of forming cytoplasmic filaments termed cytoophidium, especially during conditions of glucose depletion; URA7 has a paralog, URA8, that arose from the whole g…
1276	YBL039C_04	76.6273750480867	-0.318638283554607	0.961629742252733	-0.331352358973589	0.74037834613942	0.999400262816908	YBL039C	URA7	Major CTP synthase isozyme (see also URA8); catalyzes the ATP-dependent transfer of the amide nitrogen from glutamine to UTP, forming CTP, the final step in de novo biosynthesis of pyrimidines; involved in phospholipid biosynthesis; capable of forming cytoplasmic filaments termed cytoophidium, especially during conditions of glucose depletion; URA7 has a paralog, URA8, that arose from the whole g…
1277	YBL039C_07	158.165590939922	-0.164985957937214	0.714971903109431	-0.230758659493731	0.817502299403195	0.999400262816908	YBL039C	URA7	Major CTP synthase isozyme (see also URA8); catalyzes the ATP-dependent transfer of the amide nitrogen from glutamine to UTP, forming CTP, the final step in de novo biosynthesis of pyrimidines; involved in phospholipid biosynthesis; capable of forming cytoplasmic filaments termed cytoophidium, especially during conditions of glucose depletion; URA7 has a paralog, URA8, that arose from the whole g…
1278	YBL039C-A_03	116.995598268231	-0.672276282081728	0.690257147989298	-0.973950482135611	0.330081126480063	0.999400262816908	NA	NA	NA
1279	YBL039C-A_06	162.495143260239	0.0293168421791358	0.58940342460554	0.0497398572102906	0.960329694291853	0.999400262816908	NA	NA	NA
1280	YBL039C-A_07	316.249099439143	-0.264191215050441	0.489194017007206	-0.540054060077659	0.58915975119971	0.999400262816908	NA	NA	NA
1281	YBL039C-A_08	131.558816664617	-0.399680697521697	0.639819527264792	-0.62467724176897	0.532182912768484	0.999400262816908	NA	NA	NA
1282	YBL039W-B_00	282.065440694009	-0.127631884358308	0.496433335725687	-0.257097731303108	0.797103328858262	0.999400262816908	NA	NA	NA
1283	YBL039W-B_01	1049.21733363687	0.375035357070337	0.300608473323175	1.24758744463982	0.21218217874241	0.999400262816908	YBL039W-B		Putative protein of unknown function; mCherry fusion protein localizes to the vacuole
1284	YBL039W-B_02	51.604381999532	-0.0887259609240382	0.946609182703345	-0.0937302981475976	0.925323401778049	0.999400262816908	YBL039W-B		Putative protein of unknown function; mCherry fusion protein localizes to the vacuole
1285	YBL039W-B_04	158.091517804063	0.704030132736002	0.625436236521113	1.12566252421199	0.260308392078472	0.999400262816908	YBL039W-B		Putative protein of unknown function; mCherry fusion protein localizes to the vacuole
1286	YBL039W-B_05	560.332666429671	-0.0823935349292298	0.399350550642825	-0.206318821387883	0.836541877456616	0.999400262816908	YBL039W-B		Putative protein of unknown function; mCherry fusion protein localizes to the vacuole
1287	YBL039W-B_06	390.340083999443	-0.0382269186580156	0.39935311742645	-0.0957220990394695	0.923741288996212	0.999400262816908	NA	NA	NA
1288	YBL040C_02	159.939201200927	1.03513447052273	0.581220660271015	1.78096640618394	0.074917938937887	0.956696136419654	YBL040C	ERD2	HDEL receptor; an integral membrane protein that binds to the HDEL motif in proteins destined for retention in the endoplasmic reticulum; has a role in maintenance of normal levels of ER-resident proteins
1289	YBL040C_03	61.558221255286	-0.398939667175522	0.964693836951863	-0.413540184351182	0.679210887352754	0.999400262816908	YBL040C	ERD2	HDEL receptor; an integral membrane protein that binds to the HDEL motif in proteins destined for retention in the endoplasmic reticulum; has a role in maintenance of normal levels of ER-resident proteins
1290	YBL040C_04	136.518425030756	-0.27449564232537	0.695722893141941	-0.394547376593755	0.693176956436783	0.999400262816908	YBL040C	ERD2	HDEL receptor; an integral membrane protein that binds to the HDEL motif in proteins destined for retention in the endoplasmic reticulum; has a role in maintenance of normal levels of ER-resident proteins
1291	YBL040C_05	132.232461449302	0.080729079662137	0.629469591847178	0.12824937170553	0.897951629662006	0.999400262816908	YBL040C	ERD2	HDEL receptor; an integral membrane protein that binds to the HDEL motif in proteins destined for retention in the endoplasmic reticulum; has a role in maintenance of normal levels of ER-resident proteins
1292	YBL041W_02	91.0610320760172	0.558723044096352	0.68742501366143	0.812776714540001	0.416346088337431	0.999400262816908	YBL041W	PRE7	Beta 6 subunit of the 20S proteasome
1293	YBL041W_03	276.257812861537	0.262113354847829	0.551238119610006	0.475499326921133	0.634431112870884	0.999400262816908	YBL041W	PRE7	Beta 6 subunit of the 20S proteasome
1294	YBL041W_04	107.265529376302	1.12706099450919	0.608834070329394	1.85117924478081	0.0641437706391764	0.930583788218221	YBL041W	PRE7	Beta 6 subunit of the 20S proteasome
1295	YBL041W_06	39.521770068822	1.75419924060889	1.09029567365451	1.6089206652807	0.107633690155999	0.999400262816908	YBL041W	PRE7	Beta 6 subunit of the 20S proteasome
1296	YBL041W_07	93.678267144584	-1.3362500707863	0.813428341097668	-1.6427385219737	0.100437044894202	0.999400262816908	YBL041W	PRE7	Beta 6 subunit of the 20S proteasome
1297	YBL041W_08	41.2467931567449	0.707574134713744	0.963803588218876	0.734147645187077	0.462858757989371	0.999400262816908	YBL041W	PRE7	Beta 6 subunit of the 20S proteasome
1298	YBL041W_09	333.310889034998	-0.45375149151385	0.401300439401007	-1.13070270292037	0.258180243327536	0.999400262816908	YBL041W	PRE7	Beta 6 subunit of the 20S proteasome
1299	YBL042C_03	76.8382907839073	-0.794516630249196	0.856747670167476	-0.927363630990541	0.35373776695665	0.999400262816908	YBL042C	FUI1	High affinity uridine permease, localizes to the plasma membrane; also mediates low but significant transport of the cytotoxic nucleoside analog 5-fluorouridine; not involved in uracil transport; relative distribution to the vacuole increases upon DNA replication stress
1300	YBL042C_04	940.230968266891	-0.469068580834762	0.424105608075132	-1.10601834048765	0.26871858113463	0.999400262816908	YBL042C	FUI1	High affinity uridine permease, localizes to the plasma membrane; also mediates low but significant transport of the cytotoxic nucleoside analog 5-fluorouridine; not involved in uracil transport; relative distribution to the vacuole increases upon DNA replication stress
1301	YBL042C_06	179.592749823546	1.09341020105104	0.617636566355247	1.77031325639185	0.0766749709452013	0.959714379214761	YBL042C	FUI1	High affinity uridine permease, localizes to the plasma membrane; also mediates low but significant transport of the cytotoxic nucleoside analog 5-fluorouridine; not involved in uracil transport; relative distribution to the vacuole increases upon DNA replication stress
1302	YBL042C_08	257.940449002246	0.339232154519563	0.536936243285044	0.631792244911793	0.527522641784858	0.999400262816908	YBL042C	FUI1	High affinity uridine permease, localizes to the plasma membrane; also mediates low but significant transport of the cytotoxic nucleoside analog 5-fluorouridine; not involved in uracil transport; relative distribution to the vacuole increases upon DNA replication stress
1303	YBL042C_09	448.694197850379	-0.628295597068543	0.435781560934942	-1.44176728294922	0.149368035441305	0.999400262816908	YBL042C	FUI1	High affinity uridine permease, localizes to the plasma membrane; also mediates low but significant transport of the cytotoxic nucleoside analog 5-fluorouridine; not involved in uracil transport; relative distribution to the vacuole increases upon DNA replication stress
1304	YBL043W_00	96.1905958209352	0.748939735241899	0.702032476677326	1.06681636551429	0.286054766979962	0.999400262816908	YBL043W	ECM13	Non-essential protein of unknown function; induced by treatment with 8-methoxypsoralen and UVA irradiation; ECM13 has a paralog, YJR115W, that arose from the whole genome duplication
1305	YBL043W_01	100.858783119436	-0.268305131914058	0.892888555489054	-0.300491175818802	0.763802526294087	0.999400262816908	YBL043W	ECM13	Non-essential protein of unknown function; induced by treatment with 8-methoxypsoralen and UVA irradiation; ECM13 has a paralog, YJR115W, that arose from the whole genome duplication
1306	YBL043W_02	207.677817484791	-0.300143596045681	0.547138296710683	-0.548569891470038	0.583300652973813	0.999400262816908	YBL043W	ECM13	Non-essential protein of unknown function; induced by treatment with 8-methoxypsoralen and UVA irradiation; ECM13 has a paralog, YJR115W, that arose from the whole genome duplication
1307	YBL043W_03	37.667836976813	0.0833414313111922	1.10335405051088	0.0755346221574143	0.939789351710531	0.999400262816908	YBL043W	ECM13	Non-essential protein of unknown function; induced by treatment with 8-methoxypsoralen and UVA irradiation; ECM13 has a paralog, YJR115W, that arose from the whole genome duplication
1308	YBL043W_06	270.626034169905	-0.723473508524195	0.451814611387109	-1.60126186778925	0.109318931018953	0.999400262816908	YBL043W	ECM13	Non-essential protein of unknown function; induced by treatment with 8-methoxypsoralen and UVA irradiation; ECM13 has a paralog, YJR115W, that arose from the whole genome duplication
1309	YBL043W_08	368.214347951589	0.332770317518219	0.449753821006876	0.739894364373017	0.459364094269206	0.999400262816908	YBL043W	ECM13	Non-essential protein of unknown function; induced by treatment with 8-methoxypsoralen and UVA irradiation; ECM13 has a paralog, YJR115W, that arose from the whole genome duplication
1310	YBL044W_00	124.939380549745	0.461968710063853	0.828601872421412	0.557527958166264	0.577166762542601	0.999400262816908	YBL044W		Putative protein of unknown function; YBL044W is not an essential protein
1311	YBL044W_01	80.1454740662456	-0.155408238829424	0.783408807071838	-0.198374383114605	0.842752158472822	0.999400262816908	YBL045C	COR1	Core subunit of the ubiquinol-cytochrome c reductase complex; the ubiquinol-cytochrome c reductase complex (bc1 complex) is a component of the mitochondrial inner membrane electron transport chain
1312	YBL044W_03	122.87683777888	1.06883309278652	0.596192012325893	1.7927665428068	0.0730102613479799	0.950365638221594	YBL044W		Putative protein of unknown function; YBL044W is not an essential protein
1313	YBL044W_05	63.5817464526574	-0.250901457801771	1.04768370612878	-0.239482065373394	0.810731801676473	0.999400262816908	YBL044W		Putative protein of unknown function; YBL044W is not an essential protein
1314	YBL044W_08	41.4049732700561	-0.52619523253326	1.13769622699461	-0.462509429185048	0.643716042056068	0.999400262816908	YBL044W		Putative protein of unknown function; YBL044W is not an essential protein
1315	YBL044W_09	300.045739904547	0.165504111570292	0.512539904853777	0.322909709084035	0.74676362310338	0.999400262816908	YBL044W		Putative protein of unknown function; YBL044W is not an essential protein
1316	YBL045C_00	131.328229369759	1.50345480903357	0.709238521887639	2.11981549596618	0.0340216079722878	0.809936167142042	YBL044W		Putative protein of unknown function; YBL044W is not an essential protein
1317	YBL045C_01	110.296136764667	0.751727767238739	0.696884739052155	1.07869741596175	0.280722637996136	0.999400262816908	YBL044W		Putative protein of unknown function; YBL044W is not an essential protein
1318	YBL045C_02	72.1938555792783	-0.513556180677894	1.04114916682652	-0.493258984438552	0.621829605251775	0.999400262816908	YBL045C	COR1	Core subunit of the ubiquinol-cytochrome c reductase complex; the ubiquinol-cytochrome c reductase complex (bc1 complex) is a component of the mitochondrial inner membrane electron transport chain
1319	YBL045C_03	109.282026783827	0.183959238464931	0.728051006802437	0.252673558234431	0.800520482454355	0.999400262816908	YBL045C	COR1	Core subunit of the ubiquinol-cytochrome c reductase complex; the ubiquinol-cytochrome c reductase complex (bc1 complex) is a component of the mitochondrial inner membrane electron transport chain
1320	YBL045C_04	102.395850344648	0.889959074524774	0.766847489322159	1.16054246368002	0.245828015419063	0.999400262816908	YBL045C	COR1	Core subunit of the ubiquinol-cytochrome c reductase complex; the ubiquinol-cytochrome c reductase complex (bc1 complex) is a component of the mitochondrial inner membrane electron transport chain
1321	YBL045C_07	43.5914770508053	-0.637415321141583	1.00499542262902	-0.634246989378454	0.525919645993774	0.999400262816908	YBL045C	COR1	Core subunit of the ubiquinol-cytochrome c reductase complex; the ubiquinol-cytochrome c reductase complex (bc1 complex) is a component of the mitochondrial inner membrane electron transport chain
1322	YBL045C_09	139.730498095685	-1.85501872611295	0.793997558630725	-2.33630280842676	0.0194754652587346	0.684692995136138	YBL044W		Putative protein of unknown function; YBL044W is not an essential protein
1323	YBL046W_00	215.55851931439	0.629122367477756	0.508154282666604	1.23805385281091	0.215696093287451	0.999400262816908	NA	NA	NA
1324	YBL046W_02	92.4736263320698	0.323653615516962	0.79410144679831	0.407572126737562	0.683587831298665	0.999400262816908	YBL046W	PSY4	Regulatory subunit of protein phosphatase PP4; presence of Psy4p in the PP4 complex (along with catalytic subunit Pph3p and Psy2p) is required for dephosphorylation of the histone variant H2AX, but not for dephosphorylation of Rad53p, during recovery from the DNA damage checkpoint; localization is cell-cycle dependent and regulated by Cdc28p phosphorylation; required for cisplatin resistance; hom…
1325	YBL046W_03	55.3744365664468	-0.218434201881498	0.951722818952685	-0.229514515709387	0.818469039813278	0.999400262816908	YBL046W	PSY4	Regulatory subunit of protein phosphatase PP4; presence of Psy4p in the PP4 complex (along with catalytic subunit Pph3p and Psy2p) is required for dephosphorylation of the histone variant H2AX, but not for dephosphorylation of Rad53p, during recovery from the DNA damage checkpoint; localization is cell-cycle dependent and regulated by Cdc28p phosphorylation; required for cisplatin resistance; hom…
1326	YBL046W_04	154.538078305731	0.148702272371582	0.566689927637191	0.262405003370353	0.793009215667751	0.999400262816908	YBL046W	PSY4	Regulatory subunit of protein phosphatase PP4; presence of Psy4p in the PP4 complex (along with catalytic subunit Pph3p and Psy2p) is required for dephosphorylation of the histone variant H2AX, but not for dephosphorylation of Rad53p, during recovery from the DNA damage checkpoint; localization is cell-cycle dependent and regulated by Cdc28p phosphorylation; required for cisplatin resistance; hom…
1327	YBL046W_05	402.58389086967	0.327184925699157	0.416875120593475	0.784851168938477	0.432540835073586	0.999400262816908	YBL046W	PSY4	Regulatory subunit of protein phosphatase PP4; presence of Psy4p in the PP4 complex (along with catalytic subunit Pph3p and Psy2p) is required for dephosphorylation of the histone variant H2AX, but not for dephosphorylation of Rad53p, during recovery from the DNA damage checkpoint; localization is cell-cycle dependent and regulated by Cdc28p phosphorylation; required for cisplatin resistance; hom…
1328	YBL046W_06	327.664331309983	0.338473773687513	0.446174272391267	0.758613381882075	0.448083865278559	0.999400262816908	NA	NA	NA
1329	YBL046W_07	382.227034122751	-0.251945761613618	0.47688822407275	-0.528311979402503	0.597282818431778	0.999400262816908	NA	NA	NA
1330	YBL046W_08	382.066249461382	0.345323132532189	0.418631203548108	0.824886271270281	0.40943616128861	0.999400262816908	NA	NA	NA
1331	YBL046W_09	548.256556652216	-0.0880757964869935	0.450108223576795	-0.195676932509913	0.844863040552768	0.999400262816908	NA	NA	NA
1332	YBL047C_02	110.02502663221	0.136539450379928	0.888335413952068	0.153702586022643	0.877844245663429	0.999400262816908	YBL047C	EDE1	Scaffold protein involved in the formation of early endocytic sites; putative regulator of cytokinesis; homo-oligomerization is required for localization to and organization of endocytic sites; has a network of interactions with other endocytic proteins; binds membranes in a ubiquitin-dependent manner; may also bind ubiquitinated membrane-associated proteins; interacts with Cmk2 and functions ups…
1333	YBL048W_00	84.7591069722933	-0.59285621803406	0.893784107879183	-0.663310314882214	0.507131831693379	0.999400262816908	NA	NA	NA
1334	YBL048W_01	145.507371554038	-0.339020141551836	0.694631144891936	-0.488057790159376	0.625508907888423	0.999400262816908	NA	NA	NA
1335	YBL048W_03	163.773729429004	-0.0276123080287905	0.724268301892371	-0.0381244187501302	0.969588482112848	0.999400262816908	NA	NA	NA
1336	YBL048W_06	204.687708677939	-0.286168839228483	0.538427197009394	-0.531490312558432	0.595079052625946	0.999400262816908	NA	NA	NA
1337	YBL049W_00	442.263638694472	0.32781115340235	0.395298708779983	0.829274536246473	0.406949076333635	0.999400262816908	YBL049W	MOH1	Protein of unknown function, essential for stationary phase survival; not required for growth on nonfermentable carbon sources; possibly linked with vacuolar transport
1338	YBL049W_01	320.143978231718	0.252671136688438	0.440743968483312	0.573283254579593	0.566452921616834	0.999400262816908	YBL049W	MOH1	Protein of unknown function, essential for stationary phase survival; not required for growth on nonfermentable carbon sources; possibly linked with vacuolar transport
1339	YBL049W_02	104.095503764762	-0.51797691529048	0.674724182533304	-0.767686898883179	0.442673221425758	0.999400262816908	YBL049W	MOH1	Protein of unknown function, essential for stationary phase survival; not required for growth on nonfermentable carbon sources; possibly linked with vacuolar transport
1340	YBL049W_04	58.9351482149844	-0.501571621268413	0.878082694325203	-0.571212283888439	0.567855752427538	0.999400262816908	YBL049W	MOH1	Protein of unknown function, essential for stationary phase survival; not required for growth on nonfermentable carbon sources; possibly linked with vacuolar transport
1341	YBL049W_06	24.2557785735745	-0.822118735643243	1.28150999532717	-0.641523467347874	0.521182638971626	0.999400262816908	YBL049W	MOH1	Protein of unknown function, essential for stationary phase survival; not required for growth on nonfermentable carbon sources; possibly linked with vacuolar transport
1342	YBL049W_07	163.186379992228	-0.274426889448444	0.634499576310452	-0.432509176829097	0.665371383943241	0.999400262816908	YBL049W	MOH1	Protein of unknown function, essential for stationary phase survival; not required for growth on nonfermentable carbon sources; possibly linked with vacuolar transport
1343	YBL049W_08	295.373298153318	0.68255671649534	0.554620472981052	1.23067349610561	0.218445004654849	0.999400262816908	YBL049W	MOH1	Protein of unknown function, essential for stationary phase survival; not required for growth on nonfermentable carbon sources; possibly linked with vacuolar transport
1344	YBL049W_09	56.1981337660262	-0.117586781828544	1.01457570646834	-0.115897493975935	0.907733781830466	0.999400262816908	YBL049W	MOH1	Protein of unknown function, essential for stationary phase survival; not required for growth on nonfermentable carbon sources; possibly linked with vacuolar transport
1345	YBL050W_00	130.028209313689	0.0594552592681323	0.66808569665311	0.0889934623147654	0.929087105822371	0.999400262816908	NA	NA	NA
1346	YBL050W_03	281.399851091339	1.51119565539869	0.408020251422605	3.70372708249101	0.000212454824509318	0.0500960356900315	YBL050W	SEC17	Alpha-SNAP cochaperone; SNARE-complex adaptor for Sec18 (NSF) during the disassembly of postfusion cis-SNARE complexes; stimulates the ATPase activity of Sec18p; peripheral membrane protein required for vesicular transport between ER and Golgi, the 'priming' step in homotypic vacuole fusion, and autophagy; similar to mammalian alpha-SNAP
1347	YBL050W_04	404.857413429915	0.26899007392602	0.376832435545021	0.713818791996962	0.475339237936342	0.999400262816908	YBL050W	SEC17	Alpha-SNAP cochaperone; SNARE-complex adaptor for Sec18 (NSF) during the disassembly of postfusion cis-SNARE complexes; stimulates the ATPase activity of Sec18p; peripheral membrane protein required for vesicular transport between ER and Golgi, the 'priming' step in homotypic vacuole fusion, and autophagy; similar to mammalian alpha-SNAP
1348	YBL050W_05	484.996641834416	-0.542997608271116	0.39117582642931	-1.38811647239976	0.165101581395347	0.999400262816908	NA	NA	NA
1349	YBL050W_08	58.5553591890226	1.20755657063201	0.898375862193372	1.34415518209024	0.178898210966047	0.999400262816908	YBL050W	SEC17	Alpha-SNAP cochaperone; SNARE-complex adaptor for Sec18 (NSF) during the disassembly of postfusion cis-SNARE complexes; stimulates the ATPase activity of Sec18p; peripheral membrane protein required for vesicular transport between ER and Golgi, the 'priming' step in homotypic vacuole fusion, and autophagy; similar to mammalian alpha-SNAP
1350	YBL050W_09	62.0081881455128	1.40138350179791	0.839363069493465	1.66957965239477	0.0950025589702309	0.994062954516096	YBL050W	SEC17	Alpha-SNAP cochaperone; SNARE-complex adaptor for Sec18 (NSF) during the disassembly of postfusion cis-SNARE complexes; stimulates the ATPase activity of Sec18p; peripheral membrane protein required for vesicular transport between ER and Golgi, the 'priming' step in homotypic vacuole fusion, and autophagy; similar to mammalian alpha-SNAP
1351	YBL051C_02	64.8475003451613	-0.918895228883927	1.00699733865894	-0.912510086777052	0.361500262137343	0.999400262816908	YBL051C	PIN4	Protein involved in G2/M phase progression and response to DNA damage; interacts with Rad53p; contains an RNA recognition motif, a nuclear localization signal, and several SQ/TQ cluster domains; hyperphosphorylated in response to DNA damage
1352	YBL051C_03	473.26679616911	-0.739012580694499	0.396489586830445	-1.86388900299299	0.0623372933654025	0.92524081382366	YBL051C	PIN4	Protein involved in G2/M phase progression and response to DNA damage; interacts with Rad53p; contains an RNA recognition motif, a nuclear localization signal, and several SQ/TQ cluster domains; hyperphosphorylated in response to DNA damage
1353	YBL052C_00	162.748865460863	-0.384765740083706	0.585037103189984	-0.657677501111854	0.510745382528343	0.999400262816908	YBL052C	SAS3	Histone acetyltransferase catalytic subunit of NuA3 complex; acetylates histone H3, involved in transcriptional silencing; homolog of the mammalian MOZ proto-oncogene; mutant has aneuploidy tolerance; sas3gcn5 double mutation is lethal
1354	YBL052C_02	139.234749124573	-0.689768334617047	0.574159886581832	-1.20135235974681	0.229614547735435	0.999400262816908	YBL052C	SAS3	Histone acetyltransferase catalytic subunit of NuA3 complex; acetylates histone H3, involved in transcriptional silencing; homolog of the mammalian MOZ proto-oncogene; mutant has aneuploidy tolerance; sas3gcn5 double mutation is lethal
1355	YBL052C_04	103.230941087345	0.618920528832622	0.784311896335983	0.789125514637725	0.430038650773599	0.999400262816908	YBL052C	SAS3	Histone acetyltransferase catalytic subunit of NuA3 complex; acetylates histone H3, involved in transcriptional silencing; homolog of the mammalian MOZ proto-oncogene; mutant has aneuploidy tolerance; sas3gcn5 double mutation is lethal
1356	YBL052C_05	205.647607102747	-0.704054616991546	0.612731157196887	-1.14904327733625	0.250538135856613	0.999400262816908	YBL052C	SAS3	Histone acetyltransferase catalytic subunit of NuA3 complex; acetylates histone H3, involved in transcriptional silencing; homolog of the mammalian MOZ proto-oncogene; mutant has aneuploidy tolerance; sas3gcn5 double mutation is lethal
1357	YBL052C_06	86.7431913962392	-0.990185773855798	0.912196346836143	-1.08549631588655	0.27770189451684	0.999400262816908	YBL052C	SAS3	Histone acetyltransferase catalytic subunit of NuA3 complex; acetylates histone H3, involved in transcriptional silencing; homolog of the mammalian MOZ proto-oncogene; mutant has aneuploidy tolerance; sas3gcn5 double mutation is lethal
1358	YBL053W_00	260.277629460069	-0.242876433142901	0.5228432779038	-0.464530086561788	0.642268008998796	0.999400262816908	NA	NA	NA
1359	YBL053W_03	166.321568260325	-0.0392699523179986	0.569905699062337	-0.0689060530235252	0.945064400357922	0.999400262816908	NA	NA	NA
1360	YBL053W_05	273.134834313932	-0.538889203854929	0.512585152461064	-1.0513164520423	0.293113273422708	0.999400262816908	NA	NA	NA
1361	YBL053W_08	173.487131926801	0.582472639612434	0.772344041834651	0.754162145445973	0.450751864878215	0.999400262816908	NA	NA	NA
1362	YBL053W_09	87.8588497303779	-0.488355407027577	0.809089443232686	-0.603586428067053	0.546118638289418	0.999400262816908	NA	NA	NA
1363	YBL054W_00	473.524131494489	0.273120765125864	0.43453015922987	0.62854271291531	0.529648475030781	0.999400262816908	YBL054W	TOD6	PAC motif binding protein involved in rRNA and ribosome biogenesis; subunit of the RPD3L histone deacetylase complex; Myb-like HTH transcription factor; hypophosphorylated by rapamycin treatment in a Sch9p-dependent manner; activated in stochastic pulses of nuclear localization
1364	YBL054W_01	323.860511372375	0.675638952613303	0.506687984855459	1.33344182772765	0.182386853678344	0.999400262816908	YBL054W	TOD6	PAC motif binding protein involved in rRNA and ribosome biogenesis; subunit of the RPD3L histone deacetylase complex; Myb-like HTH transcription factor; hypophosphorylated by rapamycin treatment in a Sch9p-dependent manner; activated in stochastic pulses of nuclear localization
1365	YBL054W_02	75.2128110790729	1.0846852781571	1.02425761777539	1.05899654474912	0.289601353318396	0.999400262816908	YBL054W	TOD6	PAC motif binding protein involved in rRNA and ribosome biogenesis; subunit of the RPD3L histone deacetylase complex; Myb-like HTH transcription factor; hypophosphorylated by rapamycin treatment in a Sch9p-dependent manner; activated in stochastic pulses of nuclear localization
1366	YBL054W_03	110.693418408952	-0.611500430037548	0.6730069600843	-0.908609370044186	0.363556358763047	0.999400262816908	YBL054W	TOD6	PAC motif binding protein involved in rRNA and ribosome biogenesis; subunit of the RPD3L histone deacetylase complex; Myb-like HTH transcription factor; hypophosphorylated by rapamycin treatment in a Sch9p-dependent manner; activated in stochastic pulses of nuclear localization
1367	YBL054W_04	229.9885725241	0.205493413057971	0.545689306337975	0.376575847595405	0.706488839444968	0.999400262816908	YBL054W	TOD6	PAC motif binding protein involved in rRNA and ribosome biogenesis; subunit of the RPD3L histone deacetylase complex; Myb-like HTH transcription factor; hypophosphorylated by rapamycin treatment in a Sch9p-dependent manner; activated in stochastic pulses of nuclear localization
1368	YBL054W_08	284.078960949897	0.120314108260281	0.681959187665201	0.176424206076314	0.85996068921595	0.999400262816908	YBL054W	TOD6	PAC motif binding protein involved in rRNA and ribosome biogenesis; subunit of the RPD3L histone deacetylase complex; Myb-like HTH transcription factor; hypophosphorylated by rapamycin treatment in a Sch9p-dependent manner; activated in stochastic pulses of nuclear localization
1369	YBL055C_02	577.217485339958	-0.451188624147079	0.38117269366782	-1.18368558829735	0.23653754592903	0.999400262816908	YBL055C		3'-->5' exonuclease and endonuclease with a possible role in apoptosis; has similarity to mammalian and C. elegans apoptotic nucleases
1370	YBL055C_04	74.0256010943448	0.0316964493121329	0.831234936245374	0.0381317578581374	0.969582630606742	0.999400262816908	YBL055C		3'-->5' exonuclease and endonuclease with a possible role in apoptosis; has similarity to mammalian and C. elegans apoptotic nucleases
1371	YBL056W_00	35.797118276878	-1.4264155732387	1.23357660342645	-1.15632508696794	0.247548210661495	0.999400262816908	NA	NA	NA
1372	YBL056W_03	83.5162584730354	-0.835375865659477	0.903327639258458	-0.924776160226025	0.355082353740096	0.999400262816908	YBL056W	PTC3	Type 2C protein phosphatase (PP2C); dephosphorylates Hog1p (see also Ptc2p) to limit maximal kinase activity induced by osmotic stress; dephosphorylates T169 phosphorylated Cdc28p (see also Ptc2p); role in DNA damage checkpoint inactivation; PTC3 has a paralog, PTC2, that arose from the whole genome duplication
1373	YBL056W_04	81.5313217223027	0.335601198117372	0.833830533972678	0.402481300988635	0.687329847181171	0.999400262816908	YBL056W	PTC3	Type 2C protein phosphatase (PP2C); dephosphorylates Hog1p (see also Ptc2p) to limit maximal kinase activity induced by osmotic stress; dephosphorylates T169 phosphorylated Cdc28p (see also Ptc2p); role in DNA damage checkpoint inactivation; PTC3 has a paralog, PTC2, that arose from the whole genome duplication
1374	YBL056W_07	76.0527631803275	-0.422891919931939	0.81659928792324	-0.517869567346097	0.604549276424596	0.999400262816908	YBL056W	PTC3	Type 2C protein phosphatase (PP2C); dephosphorylates Hog1p (see also Ptc2p) to limit maximal kinase activity induced by osmotic stress; dephosphorylates T169 phosphorylated Cdc28p (see also Ptc2p); role in DNA damage checkpoint inactivation; PTC3 has a paralog, PTC2, that arose from the whole genome duplication
1375	YBL056W_08	345.944319012737	0.090416752748557	0.436154548239909	0.2073043904126	0.835772145571636	0.999400262816908	YBL056W	PTC3	Type 2C protein phosphatase (PP2C); dephosphorylates Hog1p (see also Ptc2p) to limit maximal kinase activity induced by osmotic stress; dephosphorylates T169 phosphorylated Cdc28p (see also Ptc2p); role in DNA damage checkpoint inactivation; PTC3 has a paralog, PTC2, that arose from the whole genome duplication
1376	YBL057C_02	190.921709021473	0.29595475627661	0.54156174310662	0.546483868263833	0.584733373581413	0.999400262816908	YBL057C	PTH2	One of two mitochondrially-localized peptidyl-tRNA hydrolases; negatively regulates the ubiquitin-proteasome pathway via interactions with ubiquitin-like ubiquitin-associated proteins; dispensable for cell growth; see also PTH1
1377	YBL057C_03	130.717399030598	-0.565449371573633	0.753418862720471	-0.750511301949475	0.45294681949206	0.999400262816908	YBL057C	PTH2	One of two mitochondrially-localized peptidyl-tRNA hydrolases; negatively regulates the ubiquitin-proteasome pathway via interactions with ubiquitin-like ubiquitin-associated proteins; dispensable for cell growth; see also PTH1
1378	YBL057C_07	521.54337876068	0.0102651529415207	0.367089340149051	0.0279636366922361	0.977691153513354	0.999729202745466	YBL056W	PTC3	Type 2C protein phosphatase (PP2C); dephosphorylates Hog1p (see also Ptc2p) to limit maximal kinase activity induced by osmotic stress; dephosphorylates T169 phosphorylated Cdc28p (see also Ptc2p); role in DNA damage checkpoint inactivation; PTC3 has a paralog, PTC2, that arose from the whole genome duplication
1379	YBL058W_02	327.322217185628	-0.527907446225372	0.425276230373187	-1.24132836147961	0.214484471600269	0.999400262816908	YBL058W	SHP1	UBX domain-containing substrate adaptor for Cdc48p; ubiquitin regulatory X domain-containing protein that acts as a substrate recruiting cofactor for Cdc48p; positively regulates Glc7p PPase activity to promote growth and mitotic progression in complex with Cdc48p; ubiquitinated protein interactor involved in ER-associated degradation (ERAD); regulated by nuclear Ub-dependent degradation (INMAD p…
1380	YBL058W_04	115.960923425814	1.11438962022268	0.701958141245578	1.58754426331643	0.112389430287118	0.999400262816908	YBL058W	SHP1	UBX domain-containing substrate adaptor for Cdc48p; ubiquitin regulatory X domain-containing protein that acts as a substrate recruiting cofactor for Cdc48p; positively regulates Glc7p PPase activity to promote growth and mitotic progression in complex with Cdc48p; ubiquitinated protein interactor involved in ER-associated degradation (ERAD); regulated by nuclear Ub-dependent degradation (INMAD p…
1381	YBL058W_07	58.7714927527941	1.03609269444341	0.830278633581154	1.24788553208281	0.212072979693512	0.999400262816908	YBL058W	SHP1	UBX domain-containing substrate adaptor for Cdc48p; ubiquitin regulatory X domain-containing protein that acts as a substrate recruiting cofactor for Cdc48p; positively regulates Glc7p PPase activity to promote growth and mitotic progression in complex with Cdc48p; ubiquitinated protein interactor involved in ER-associated degradation (ERAD); regulated by nuclear Ub-dependent degradation (INMAD p…
1382	YBL058W_08	163.887663826655	-0.304365527333407	0.579385310780995	-0.525324894625186	0.599357354333605	0.999400262816908	YBL058W	SHP1	UBX domain-containing substrate adaptor for Cdc48p; ubiquitin regulatory X domain-containing protein that acts as a substrate recruiting cofactor for Cdc48p; positively regulates Glc7p PPase activity to promote growth and mitotic progression in complex with Cdc48p; ubiquitinated protein interactor involved in ER-associated degradation (ERAD); regulated by nuclear Ub-dependent degradation (INMAD p…
1383	YBL058W_09	264.952628606518	0.657967577635271	0.499798611789122	1.31646539649231	0.188017885325892	0.999400262816908	YBL058W	SHP1	UBX domain-containing substrate adaptor for Cdc48p; ubiquitin regulatory X domain-containing protein that acts as a substrate recruiting cofactor for Cdc48p; positively regulates Glc7p PPase activity to promote growth and mitotic progression in complex with Cdc48p; ubiquitinated protein interactor involved in ER-associated degradation (ERAD); regulated by nuclear Ub-dependent degradation (INMAD p…
1384	YBL059C-A_00	181.554785574057	0.72577593100157	0.715866672340479	1.01384232433771	0.310657995885111	0.999400262816908	YBL059C-A	CMC2	Protein involved in respiratory chain complex assembly or maintenance; protein of the mitochondrial intermembrane space; contains twin Cx9C motifs that can form coiled coil-helix-coiled-coil helix fold
1385	YBL059C-A_04	54.445325534263	-0.356338121360739	0.945821294590463	-0.37674994568084	0.706359441820066	0.999400262816908	YBL059C-A	CMC2	Protein involved in respiratory chain complex assembly or maintenance; protein of the mitochondrial intermembrane space; contains twin Cx9C motifs that can form coiled coil-helix-coiled-coil helix fold
1386	YBL059C-A_09	259.571146644797	0.277677796129083	0.485644856834896	0.571771310292049	0.567476916233024	0.999400262816908	YBL059C-A	CMC2	Protein involved in respiratory chain complex assembly or maintenance; protein of the mitochondrial intermembrane space; contains twin Cx9C motifs that can form coiled coil-helix-coiled-coil helix fold
1387	YBL059W_03	121.323347191646	0.561204410305044	0.627171804532156	0.894817665988157	0.370884565124921	0.999400262816908	YBL059W		Putative protein of unknown function; the authentic, non-tagged protein is detected in highly purified mitochondria in high-throughput studies; YBL059W has a paralog, YER093C-A, that arose from the whole genome duplication
1388	YBL059W_06	294.630649252437	-0.130258205641261	0.46372066348238	-0.280897997218988	0.778788636821769	0.999400262816908	YBL059W		Putative protein of unknown function; the authentic, non-tagged protein is detected in highly purified mitochondria in high-throughput studies; YBL059W has a paralog, YER093C-A, that arose from the whole genome duplication
1389	YBL059W_07	306.678703993055	0.271892422909648	0.416404546424992	0.652952579994525	0.513786849883221	0.999400262816908	YBL059W		Putative protein of unknown function; the authentic, non-tagged protein is detected in highly purified mitochondria in high-throughput studies; YBL059W has a paralog, YER093C-A, that arose from the whole genome duplication
1390	YBL059W_08	195.976829832437	-0.0254848072494746	0.579943140467461	-0.0439436307996205	0.964949336523472	0.999400262816908	YBL059W		Putative protein of unknown function; the authentic, non-tagged protein is detected in highly purified mitochondria in high-throughput studies; YBL059W has a paralog, YER093C-A, that arose from the whole genome duplication
1391	YBL059W_09	96.4249996594038	-0.0519519010163677	0.758065876974305	-0.0685321719317128	0.945362010771402	0.999400262816908	YBL059W		Putative protein of unknown function; the authentic, non-tagged protein is detected in highly purified mitochondria in high-throughput studies; YBL059W has a paralog, YER093C-A, that arose from the whole genome duplication
1392	YBL060W_01	121.685332247265	-1.18872145459045	0.654399785815908	-1.81650648480629	0.0692927140912811	0.94061944939907	YBL060W	YEL1	Guanine nucleotide exchange factor specific for Arf3p; localized to the bud neck and tip; required for localization of Arf3p to the bud neck and tip
1393	YBL060W_02	57.5810458432949	0.689160470887155	0.978551873383221	0.70426564971407	0.481267353937962	0.999400262816908	YBL060W	YEL1	Guanine nucleotide exchange factor specific for Arf3p; localized to the bud neck and tip; required for localization of Arf3p to the bud neck and tip
1394	YBL060W_06	109.215992755997	0.295609910761958	0.965725345032459	0.306101431719203	0.759527417862688	0.999400262816908	YBL060W	YEL1	Guanine nucleotide exchange factor specific for Arf3p; localized to the bud neck and tip; required for localization of Arf3p to the bud neck and tip
1395	YBL060W_07	166.027376943293	-1.05274915617489	0.581571524160902	-1.81018002505163	0.0702678741901154	0.941140811540143	YBL060W	YEL1	Guanine nucleotide exchange factor specific for Arf3p; localized to the bud neck and tip; required for localization of Arf3p to the bud neck and tip
1396	YBL060W_08	208.756729355873	-0.468210772056997	0.570601731265648	-0.82055617149717	0.411899121279359	0.999400262816908	YBL060W	YEL1	Guanine nucleotide exchange factor specific for Arf3p; localized to the bud neck and tip; required for localization of Arf3p to the bud neck and tip
1397	YBL060W_09	135.755143561639	0.287820229518157	0.679104907761599	0.42382292666216	0.671694956527956	0.999400262816908	YBL060W	YEL1	Guanine nucleotide exchange factor specific for Arf3p; localized to the bud neck and tip; required for localization of Arf3p to the bud neck and tip
1398	YBL061C_03	280.220044024505	-0.00610241732016275	0.486677872958541	-0.0125389249424179	0.989995647535183	0.999761532217726	YBL061C	SKT5	Activator of Chs3p (chitin synthase III) during vegetative growth; recruits Chs3p to the bud neck via interaction with Bni4p; SKT5 has a paralog, SHC1, that arose from the whole genome duplication
1399	YBL062W_01	338.284777250697	-0.540384557361165	0.449844597289355	-1.20126941752192	0.229646709522212	0.999400262816908	NA	NA	NA
1400	YBL062W_02	260.565385666646	-0.417524992696679	0.588462813179512	-0.709518058483181	0.478003049154235	0.999400262816908	NA	NA	NA
1401	YBL062W_03	449.085704820788	0.0856874327218758	0.377285510601922	0.227115620170968	0.820333838256765	0.999400262816908	NA	NA	NA
1402	YBL062W_04	79.7516885955708	-1.44370467119109	0.797137762427837	-1.81111062508695	0.0701237291435642	0.94061944939907	NA	NA	NA
1403	YBL062W_05	269.010903167069	0.00857435966124808	0.455338939939353	0.0188307190735545	0.984976147887238	0.999761532217726	NA	NA	NA
1404	YBL062W_06	208.242965562046	-0.106133688906845	0.585919996676648	-0.181140240150255	0.856257499934068	0.999400262816908	NA	NA	NA
1405	YBL062W_08	86.4743433437316	0.496271456555495	0.759645798155298	0.65329322924003	0.513567256578058	0.999400262816908	NA	NA	NA
1406	YBL062W_09	173.370441855752	-0.233664466462365	0.657290254128948	-0.355496624199945	0.722217573485709	0.999400262816908	NA	NA	NA
1407	YBL063W_00	426.622203242435	-0.427241268951524	0.400698985437684	-1.06623995687148	0.286315184020597	0.999400262816908	YBL063W	KIP1	Kinesin-related motor protein; required for mitotic spindle assembly, chromosome segregation, and 2 micron plasmid partitioning; functionally redundant with Cin8p for chromosomal but not plasmid functions
1408	YBL063W_01	208.426214469755	0.50478810911018	0.513619378616056	0.982805809372551	0.325703022124647	0.999400262816908	YBL063W	KIP1	Kinesin-related motor protein; required for mitotic spindle assembly, chromosome segregation, and 2 micron plasmid partitioning; functionally redundant with Cin8p for chromosomal but not plasmid functions
1409	YBL063W_02	151.333808584242	0.304076955537971	0.600995802679103	0.505955206646144	0.612888095350385	0.999400262816908	YBL063W	KIP1	Kinesin-related motor protein; required for mitotic spindle assembly, chromosome segregation, and 2 micron plasmid partitioning; functionally redundant with Cin8p for chromosomal but not plasmid functions
1410	YBL063W_03	210.10341926264	0.222011684053301	0.601238173265975	0.369257465551989	0.711935826277037	0.999400262816908	YBL063W	KIP1	Kinesin-related motor protein; required for mitotic spindle assembly, chromosome segregation, and 2 micron plasmid partitioning; functionally redundant with Cin8p for chromosomal but not plasmid functions
1411	YBL064C_00	52.2984303800964	0.308541841029789	1.00287037496868	0.307658745069048	0.758342014643096	0.999400262816908	YBL064C	PRX1	Mitochondrial peroxiredoxin with thioredoxin peroxidase activity; has a role in reduction of hydroperoxides; reactivation requires Trr2p and glutathione; induced during respiratory growth and oxidative stress; phosphorylated; protein abundance increases in response to DNA replication stress
1412	YBL064C_01	328.662555071576	-0.433431747743881	0.496711858482641	-0.872601973039122	0.38288006475603	0.999400262816908	YBL064C	PRX1	Mitochondrial peroxiredoxin with thioredoxin peroxidase activity; has a role in reduction of hydroperoxides; reactivation requires Trr2p and glutathione; induced during respiratory growth and oxidative stress; phosphorylated; protein abundance increases in response to DNA replication stress
1413	YBL064C_02	55.5245227611498	-0.255799196499274	0.907298468629486	-0.28193500302681	0.777993349236563	0.999400262816908	YBL064C	PRX1	Mitochondrial peroxiredoxin with thioredoxin peroxidase activity; has a role in reduction of hydroperoxides; reactivation requires Trr2p and glutathione; induced during respiratory growth and oxidative stress; phosphorylated; protein abundance increases in response to DNA replication stress
1414	YBL064C_03	141.455580538548	-1.41145809805746	0.615622803782208	-2.29273199333403	0.0218634394221548	0.707372657145852	YBL064C	PRX1	Mitochondrial peroxiredoxin with thioredoxin peroxidase activity; has a role in reduction of hydroperoxides; reactivation requires Trr2p and glutathione; induced during respiratory growth and oxidative stress; phosphorylated; protein abundance increases in response to DNA replication stress
1415	YBL064C_07	228.059520752714	-0.53491395882966	0.595129654616653	-0.89881919793464	0.368748972591818	0.999400262816908	YBL064C	PRX1	Mitochondrial peroxiredoxin with thioredoxin peroxidase activity; has a role in reduction of hydroperoxides; reactivation requires Trr2p and glutathione; induced during respiratory growth and oxidative stress; phosphorylated; protein abundance increases in response to DNA replication stress
1416	YBL064C_08	351.813923357201	0.128498207354047	0.477709957470611	0.268987919017686	0.787938979392386	0.999400262816908	YBL064C	PRX1	Mitochondrial peroxiredoxin with thioredoxin peroxidase activity; has a role in reduction of hydroperoxides; reactivation requires Trr2p and glutathione; induced during respiratory growth and oxidative stress; phosphorylated; protein abundance increases in response to DNA replication stress
1417	YBL064C_09	168.095678451902	0.0505846060120408	0.577529485149793	0.0875879194270414	0.930204204175935	0.999400262816908	YBL064C	PRX1	Mitochondrial peroxiredoxin with thioredoxin peroxidase activity; has a role in reduction of hydroperoxides; reactivation requires Trr2p and glutathione; induced during respiratory growth and oxidative stress; phosphorylated; protein abundance increases in response to DNA replication stress
1418	YBL065W_00	115.109752941438	0.653392015463842	0.726076578655998	0.899894080970496	0.368176620363019	0.999400262816908	NA	NA	NA
1419	YBL065W_01	202.583113880016	-0.357808769980901	0.556746535009576	-0.642678036558856	0.520433035394649	0.999400262816908	NA	NA	NA
1420	YBL065W_05	444.85682382298	-0.0947307283288473	0.396067511926878	-0.239178234710492	0.810967379118351	0.999400262816908	NA	NA	NA
1421	YBL065W_06	176.220867661344	0.253848026919634	0.572263238782967	0.443586115123336	0.657341846186575	0.999400262816908	NA	NA	NA
1422	YBL065W_07	111.157664899932	-0.18544205581063	0.869327711327062	-0.213316627773829	0.831080004930146	0.999400262816908	NA	NA	NA
1423	YBL065W_09	77.4290873115816	0.8346560878419	0.936793965106473	0.890970820619062	0.372944824500302	0.999400262816908	NA	NA	NA
1424	YBL066C_00	241.252535514602	-0.248628146494467	0.580154470970116	-0.428555081336732	0.668247040554939	0.999400262816908	YBL066C	SEF1	Putative transcription factor; has homolog in Kluyveromyces lactis
1425	YBL066C_01	311.559855579318	0.109884134268656	0.544665166898572	0.201746212070724	0.840115133321033	0.999400262816908	YBL066C	SEF1	Putative transcription factor; has homolog in Kluyveromyces lactis
1426	YBL066C_04	102.536767382445	-0.0374835135723797	0.790974079247529	-0.0473890542760119	0.962203152642846	0.999400262816908	YBL066C	SEF1	Putative transcription factor; has homolog in Kluyveromyces lactis
1427	YBL066C_05	191.407475098184	0.550354014475325	0.556299916787307	0.989311696564111	0.32251066308252	0.999400262816908	YBL066C	SEF1	Putative transcription factor; has homolog in Kluyveromyces lactis
1428	YBL066C_07	199.045041267542	0.66264707908071	0.543871250188052	1.21838960756169	0.223075952457718	0.999400262816908	YBL066C	SEF1	Putative transcription factor; has homolog in Kluyveromyces lactis
1429	YBL066C_08	48.2442410746915	0.917179501182156	0.943152783847271	0.972461214015437	0.330821151439689	0.999400262816908	YBL066C	SEF1	Putative transcription factor; has homolog in Kluyveromyces lactis
1430	YBL066C_09	353.393796158386	0.183104630556695	0.419685646854907	0.436289951607512	0.662626371439856	0.999400262816908	YBL066C	SEF1	Putative transcription factor; has homolog in Kluyveromyces lactis
1431	YBL068W_00	138.042524284085	0.140642503726864	0.619627781658613	0.226979015289459	0.82044005970898	0.999400262816908	YBL068W	PRS4	5-phospho-ribosyl-1(alpha)-pyrophosphate synthetase, synthesizes PRPP; which is required for nucleotide, histidine, and tryptophan biosynthesis; one of five related enzymes, which are active as heteromultimeric complexes; PRS4 has a paralog, PRS2, that arose from the whole genome duplication; a missense mutation in the conserved residue R196 of its human homolog PRPS1 is pathogenic
1432	YBL068W_02	168.657063253352	-1.08347502600518	0.610932765417613	-1.77347670207957	0.076149749092018	0.958593994558648	YBL068W	PRS4	5-phospho-ribosyl-1(alpha)-pyrophosphate synthetase, synthesizes PRPP; which is required for nucleotide, histidine, and tryptophan biosynthesis; one of five related enzymes, which are active as heteromultimeric complexes; PRS4 has a paralog, PRS2, that arose from the whole genome duplication; a missense mutation in the conserved residue R196 of its human homolog PRPS1 is pathogenic
1433	YBL068W_03	90.9395811398382	-0.729280179625145	0.772315705009463	-0.944277288283564	0.34502796877712	0.999400262816908	YBL068W	PRS4	5-phospho-ribosyl-1(alpha)-pyrophosphate synthetase, synthesizes PRPP; which is required for nucleotide, histidine, and tryptophan biosynthesis; one of five related enzymes, which are active as heteromultimeric complexes; PRS4 has a paralog, PRS2, that arose from the whole genome duplication; a missense mutation in the conserved residue R196 of its human homolog PRPS1 is pathogenic
1434	YBL068W_04	276.064289888807	-0.511666439637126	0.449969569330919	-1.1371134283546	0.255490871021774	0.999400262816908	YBL068W	PRS4	5-phospho-ribosyl-1(alpha)-pyrophosphate synthetase, synthesizes PRPP; which is required for nucleotide, histidine, and tryptophan biosynthesis; one of five related enzymes, which are active as heteromultimeric complexes; PRS4 has a paralog, PRS2, that arose from the whole genome duplication; a missense mutation in the conserved residue R196 of its human homolog PRPS1 is pathogenic
1435	YBL068W_05	147.622251425082	0.432999491754432	0.722960124934511	0.59892582843854	0.549222346889625	0.999400262816908	YBL068W	PRS4	5-phospho-ribosyl-1(alpha)-pyrophosphate synthetase, synthesizes PRPP; which is required for nucleotide, histidine, and tryptophan biosynthesis; one of five related enzymes, which are active as heteromultimeric complexes; PRS4 has a paralog, PRS2, that arose from the whole genome duplication; a missense mutation in the conserved residue R196 of its human homolog PRPS1 is pathogenic
1436	YBL068W_07	137.749302851923	-0.586260342566057	0.758406583148428	-0.773015893575543	0.439512974591111	0.999400262816908	YBL068W	PRS4	5-phospho-ribosyl-1(alpha)-pyrophosphate synthetase, synthesizes PRPP; which is required for nucleotide, histidine, and tryptophan biosynthesis; one of five related enzymes, which are active as heteromultimeric complexes; PRS4 has a paralog, PRS2, that arose from the whole genome duplication; a missense mutation in the conserved residue R196 of its human homolog PRPS1 is pathogenic
1437	YBL068W_09	110.866712674449	-0.158549198075878	0.722192103265627	-0.219538814338936	0.826230347772423	0.999400262816908	YBL068W	PRS4	5-phospho-ribosyl-1(alpha)-pyrophosphate synthetase, synthesizes PRPP; which is required for nucleotide, histidine, and tryptophan biosynthesis; one of five related enzymes, which are active as heteromultimeric complexes; PRS4 has a paralog, PRS2, that arose from the whole genome duplication; a missense mutation in the conserved residue R196 of its human homolog PRPS1 is pathogenic
1438	YBL068W-A_00	207.80763076177	-0.47593431193784	0.529164138295514	-0.899407721526382	0.368435527828285	0.999400262816908	NA	NA	NA
1439	YBL068W-A_01	138.840283090451	-0.0991106760704649	0.665435299845318	-0.148941115828246	0.881600097291704	0.999400262816908	NA	NA	NA
1440	YBL068W-A_03	147.287030889797	-0.359672542668835	0.763777749572228	-0.470912569618948	0.637703171498655	0.999400262816908	NA	NA	NA
1441	YBL068W-A_04	110.491407819448	-0.429207873311366	0.730365169503758	-0.587662023372484	0.556759170895097	0.999400262816908	NA	NA	NA
1442	YBL068W-A_08	44.6113618441436	-0.250185353711947	1.12549290987659	-0.222289586648199	0.824088457985281	0.999400262816908	NA	NA	NA
1443	YBL068W-A_09	130.139069320793	0.787681596665791	0.644245434805866	1.22264210828773	0.221464901471323	0.999400262816908	NA	NA	NA
1444	YBL069W_00	423.121812837245	0.010719156522177	0.404687467617405	0.0264874931395477	0.978868509129383	0.999729202745466	YBL069W	AST1	Lipid raft associated protein; interacts with the plasma membrane ATPase Pma1p and has a role in its targeting to the plasma membrane by influencing its incorporation into lipid rafts; sometimes classified in the medium-chain dehydrogenase/reductases (MDRs) superfamily; AST1 has a paralog, AST2, that arose from the whole genome duplication
1445	YBL069W_01	366.509989223358	-0.24975013486861	0.419416856533572	-0.595469950666178	0.551529379584411	0.999400262816908	YBL069W	AST1	Lipid raft associated protein; interacts with the plasma membrane ATPase Pma1p and has a role in its targeting to the plasma membrane by influencing its incorporation into lipid rafts; sometimes classified in the medium-chain dehydrogenase/reductases (MDRs) superfamily; AST1 has a paralog, AST2, that arose from the whole genome duplication
1446	YBL069W_02	188.709803703575	0.459716717648188	0.65062101673628	0.706581413484416	0.479826642693875	0.999400262816908	YBL069W	AST1	Lipid raft associated protein; interacts with the plasma membrane ATPase Pma1p and has a role in its targeting to the plasma membrane by influencing its incorporation into lipid rafts; sometimes classified in the medium-chain dehydrogenase/reductases (MDRs) superfamily; AST1 has a paralog, AST2, that arose from the whole genome duplication
1447	YBL069W_04	417.497544962436	0.12909320687869	0.386443084289624	0.334054902589328	0.738338129632258	0.999400262816908	YBL069W	AST1	Lipid raft associated protein; interacts with the plasma membrane ATPase Pma1p and has a role in its targeting to the plasma membrane by influencing its incorporation into lipid rafts; sometimes classified in the medium-chain dehydrogenase/reductases (MDRs) superfamily; AST1 has a paralog, AST2, that arose from the whole genome duplication
1448	YBL069W_05	83.2231577531051	0.144139799792656	0.798633403068957	0.180483059234389	0.856773352784282	0.999400262816908	YBL069W	AST1	Lipid raft associated protein; interacts with the plasma membrane ATPase Pma1p and has a role in its targeting to the plasma membrane by influencing its incorporation into lipid rafts; sometimes classified in the medium-chain dehydrogenase/reductases (MDRs) superfamily; AST1 has a paralog, AST2, that arose from the whole genome duplication
1449	YBL069W_06	112.654996639132	-0.0462073636653158	0.807564073339835	-0.0572182012434214	0.954371379416671	0.999400262816908	YBL069W	AST1	Lipid raft associated protein; interacts with the plasma membrane ATPase Pma1p and has a role in its targeting to the plasma membrane by influencing its incorporation into lipid rafts; sometimes classified in the medium-chain dehydrogenase/reductases (MDRs) superfamily; AST1 has a paralog, AST2, that arose from the whole genome duplication
1450	YBL070C_01	42.5816007527376	-1.33472149445366	1.25806542440477	-1.06093170399716	0.288720939896328	0.999400262816908	NA	NA	NA
1451	YBL070C_05	49.7797271244996	0.676971698335278	0.972321608800106	0.696242572630568	0.486276930509598	0.999400262816908	NA	NA	NA
1452	YBL070C_06	67.420987585235	0.551877413771327	0.900798350405288	0.612653668296601	0.540105363830276	0.999400262816908	NA	NA	NA
1453	YBL070C_07	386.433710005154	0.0168668422812602	0.407438000478399	0.0413973224428154	0.966979147350242	0.999400262816908	NA	NA	NA
1454	YBL070C_08	184.255474401039	0.105480027424315	0.528739616699762	0.199493331108213	0.84187685951949	0.999400262816908	NA	NA	NA
1455	YBL070C_09	35.5171184411103	0.120822790917242	1.04010205190072	0.116164361657057	0.907522280769352	0.999400262816908	NA	NA	NA
1456	YBL071C_01	194.356952847194	0.991468005264267	0.747078641714174	1.32712669042357	0.184466777605202	0.999400262816908	YBL071C		Putative protein of unknown function; conserved among S. cerevisiae strains; YBL071C is not an essential gene
1457	YBL071C_05	132.483759129114	0.0768613089776674	0.682879862669826	0.112554657384633	0.910383634693385	0.999400262816908	YBL071C		Putative protein of unknown function; conserved among S. cerevisiae strains; YBL071C is not an essential gene
1458	YBL071C_06	235.880397293771	-0.511918923998608	0.512700444039681	-0.998475679024352	0.318048752196601	0.999400262816908	YBL071C		Putative protein of unknown function; conserved among S. cerevisiae strains; YBL071C is not an essential gene
1459	YBL071C_07	251.950675163998	0.0138647278501213	0.519694288173052	0.0266786227319561	0.978716063651719	0.999729202745466	YBL071C		Putative protein of unknown function; conserved among S. cerevisiae strains; YBL071C is not an essential gene
1460	YBL071C_08	116.893439156855	0.202838631934806	0.627623730848035	0.323185089991314	0.746555072004451	0.999400262816908	YBL071C		Putative protein of unknown function; conserved among S. cerevisiae strains; YBL071C is not an essential gene
1461	YBL071C-B_00	354.543476570223	-0.318343313271546	0.412536240556161	-0.771673569435673	0.440307788689029	0.999400262816908	NA	NA	NA
1462	YBL071C-B_01	221.822217067796	1.08393461495674	0.681193098475785	1.59122959023237	0.111557915879697	0.999400262816908	YBL071C-B		Putative protein of unknown function; identified by gene-trapping, microarray-based expression analysis, and genome-wide homology searching
1463	YBL071C-B_03	286.335028497308	0.509944243463501	0.468980862704814	1.08734552732585	0.276884135214589	0.999400262816908	YBL071C-B		Putative protein of unknown function; identified by gene-trapping, microarray-based expression analysis, and genome-wide homology searching
1464	YBL071C-B_06	40.8633458095866	0.722855642304773	1.0647389717926	0.678904089598381	0.497198634312997	0.999400262816908	YBL071C-B		Putative protein of unknown function; identified by gene-trapping, microarray-based expression analysis, and genome-wide homology searching
1465	YBL071C-B_08	317.750383198857	0.621292112674979	0.426563917048139	1.45650414356277	0.145253305009999	0.999400262816908	YBL071C-B		Putative protein of unknown function; identified by gene-trapping, microarray-based expression analysis, and genome-wide homology searching
1466	YBL071C-B_09	594.844093051746	0.268641055784629	0.383062157323207	0.701298864032567	0.483116522507291	0.999400262816908	YBL071C-B		Putative protein of unknown function; identified by gene-trapping, microarray-based expression analysis, and genome-wide homology searching
1467	YBL071W-A_02	132.24453268723	0.840008267233858	0.609090772293093	1.37911836042338	0.167858263800396	0.999400262816908	YBL071W-A	KTI11	Zn-ribbon protein that co-purifies with Dph1 and Dph2; in a complex required for synthesis of diphthamide on translation factor eEF2 and with Elongator subunits Iki3p, Elp2p, and Elp3p; involved in modification of wobble nucleosides in tRNAs; forms a stable heterodimer with Ats1p
1468	YBL071W-A_05	90.5482277968455	-0.826648841954312	0.789582767603648	-1.04694387450116	0.295125464747155	0.999400262816908	YBL071W-A	KTI11	Zn-ribbon protein that co-purifies with Dph1 and Dph2; in a complex required for synthesis of diphthamide on translation factor eEF2 and with Elongator subunits Iki3p, Elp2p, and Elp3p; involved in modification of wobble nucleosides in tRNAs; forms a stable heterodimer with Ats1p
1469	YBL071W-A_06	147.878486617932	-0.0505992480255708	0.582673544948436	-0.0868397895601191	0.930798859575747	0.999400262816908	YBL071W-A	KTI11	Zn-ribbon protein that co-purifies with Dph1 and Dph2; in a complex required for synthesis of diphthamide on translation factor eEF2 and with Elongator subunits Iki3p, Elp2p, and Elp3p; involved in modification of wobble nucleosides in tRNAs; forms a stable heterodimer with Ats1p
1470	YBL071W-A_09	115.620973487234	1.17462323509356	0.631264580707451	1.86074630351852	0.0627800116126988	0.926681032656344	YBL071W-A	KTI11	Zn-ribbon protein that co-purifies with Dph1 and Dph2; in a complex required for synthesis of diphthamide on translation factor eEF2 and with Elongator subunits Iki3p, Elp2p, and Elp3p; involved in modification of wobble nucleosides in tRNAs; forms a stable heterodimer with Ats1p
1471	YBL072C_01	219.694874043832	1.35200943244673	0.454160126701844	2.97694437040334	0.00291136831299237	0.263678098690669	YBL072C	RPS8A	Protein component of the small (40S) ribosomal subunit; homologous to mammalian ribosomal protein S8, no bacterial homolog; RPS8A has a paralog, RPS8B, that arose from the whole genome duplication
1472	YBL072C_05	200.249885175353	1.47387669603103	0.46600661048798	3.16278066203322	0.00156270021738352	0.184827993762102	YBL072C	RPS8A	Protein component of the small (40S) ribosomal subunit; homologous to mammalian ribosomal protein S8, no bacterial homolog; RPS8A has a paralog, RPS8B, that arose from the whole genome duplication
1473	YBL072C_07	130.49293696662	1.79944527941922	0.578652423527361	3.10971700152939	0.00187266670804804	0.208186551146962	YBL072C	RPS8A	Protein component of the small (40S) ribosomal subunit; homologous to mammalian ribosomal protein S8, no bacterial homolog; RPS8A has a paralog, RPS8B, that arose from the whole genome duplication
1474	YBL072C_08	68.0651546459109	0.141859028142798	0.950355272823029	0.149269470270214	0.881341004545914	0.999400262816908	YBL072C	RPS8A	Protein component of the small (40S) ribosomal subunit; homologous to mammalian ribosomal protein S8, no bacterial homolog; RPS8A has a paralog, RPS8B, that arose from the whole genome duplication
1475	YBL072C_09	76.1569515112629	1.41919854768917	0.84386986008949	1.68177418676698	0.0926126360157592	0.986407862387244	YBL071C-B		Putative protein of unknown function; identified by gene-trapping, microarray-based expression analysis, and genome-wide homology searching
1476	YBL073W_00	211.101475048346	-0.954229287813195	0.517952694801715	-1.84230972710451	0.0654298577587548	0.930583788218221	NA	NA	NA
1477	YBL073W_01	76.2198121211393	1.28390856161308	0.88284250614701	1.45428947142163	0.145866068229496	0.999400262816908	NA	NA	NA
1478	YBL073W_03	77.3108489349068	0.822012955157966	0.78809409379029	1.04303910108569	0.296930183670331	0.999400262816908	NA	NA	NA
1479	YBL073W_04	79.8779073298042	0.69528100693863	0.879618534367035	0.790434693874371	0.429273947411341	0.999400262816908	NA	NA	NA
1480	YBL073W_06	103.658090167577	-0.790264932898384	0.790659150037154	-0.999501406973218	0.317551857847487	0.999400262816908	NA	NA	NA
1481	YBL073W_07	53.8832753081892	0.907725478495841	1.13916884281725	0.796831377735868	0.425548969105155	0.999400262816908	NA	NA	NA
1482	YBL073W_08	88.43341148819	0.0337849588612353	0.738485667014934	0.0457489703189487	0.963510331973302	0.999400262816908	NA	NA	NA
1483	YBL073W_09	128.334624885793	-0.89339313433075	0.807020296520386	-1.10702684701088	0.268282321151486	0.999400262816908	NA	NA	NA
1484	YBL074C_00	39.4987857971393	0.0153719341850414	1.18069772006227	0.0130193646721285	0.989612343395451	0.999761532217726	snR56	SNR56	C/D box small nucleolar RNA (snoRNA); guides 2'-O-methylation of small subunit (SSU) rRNA at position G1428
1485	YBL074C_02	679.147844294587	-0.367276987040219	0.337299763180627	-1.08887413254287	0.276209394736522	0.999400262816908	YBL074C	AAR2	Component of the U5 snRNP complex; required for splicing of U3 precursors; originally described as a splicing factor specifically required for splicing pre-mRNA of the MATa1 cistron
1486	YBL074C_03	62.9082882977249	0.161680579602133	0.865538848386274	0.186797600019425	0.851819328704689	0.999400262816908	YBL074C	AAR2	Component of the U5 snRNP complex; required for splicing of U3 precursors; originally described as a splicing factor specifically required for splicing pre-mRNA of the MATa1 cistron
1487	YBL074C_06	105.191108808247	0.637013856204618	0.763865296653297	0.833934803682731	0.404317723653702	0.999400262816908	YBL074C	AAR2	Component of the U5 snRNP complex; required for splicing of U3 precursors; originally described as a splicing factor specifically required for splicing pre-mRNA of the MATa1 cistron
1488	YBL074C_07	209.47505518936	0.281880971958519	0.555589461194243	0.507354785586852	0.61190590448061	0.999400262816908	YBL074C	AAR2	Component of the U5 snRNP complex; required for splicing of U3 precursors; originally described as a splicing factor specifically required for splicing pre-mRNA of the MATa1 cistron
1489	YBL074C_08	146.890161397485	0.891671492262537	0.57909402267404	1.53976980826901	0.123616473772176	0.999400262816908	YBL074C	AAR2	Component of the U5 snRNP complex; required for splicing of U3 precursors; originally described as a splicing factor specifically required for splicing pre-mRNA of the MATa1 cistron
[truncated: 35,531 more rows]
